# Supplementary material for: Magnesium(0) complexes and their reduction reactions with binary transition metal carbonyls
Source: Royal Society of Chemistry journal article supplement (doi:10.1039/d6sc01992g), 2026-04-20
Supplement: d6sc01992g1.pdf [file d6sc01992g1.pdf]

## ASSOCIATED CONTENT

### ELECTRONIC SUPPLEMENTARY INFORMATION

#### **Magnesium(0) Complexes and their Reduction Reactions with Binary Transition Metal Carbonyls**

Yixiao Jiang,<sup>a</sup> Maryam Niksefat,<sup>a</sup> Sophie G. Unsworth,<sup>a</sup> Joseph M. Parr,<sup>a</sup> Matthew J. Evans,<sup>a,b</sup>

Cameron Jones<sup>a,\*</sup>

<sup>a</sup> *School of Chemistry, PO Box 23, Monash University, VIC, 3800, Australia.*

<sup>b</sup> *College of Science and Engineering, Flinders University, Bedford Park, SA, 5042, Australia.*

#### **Contents (115 pages)**

|                                 |             |
|---------------------------------|-------------|
| <b>1. Syntheses and Spectra</b> | <b>S2</b>   |
| <b>2. X-ray Crystallography</b> | <b>S68</b>  |
| <b>3. Computational Details</b> | <b>S92</b>  |
| <b>4. References</b>            | <b>S114</b> |

## 1. Syntheses and Spectra

### *General Experimental*

All manipulations were carried out using standard Schlenk and glove box techniques under an atmosphere of high purity dinitrogen. Pentane and diethyl ether were distilled over Na/K alloy (50:50), while hexane, toluene and THF were distilled over molten potassium.  $^1\text{H}$  and  $^{13}\text{C}\{^1\text{H}\}$  NMR spectra were recorded on either Bruker DPX300, Bruker AvanceIII 600 or Bruker AvanceIII 400 spectrometers and were referenced to the resonances of the solvent used. FTIR spectra were collected for solid samples or Nujol mulls on an Agilent Cary 630 attenuated total reflectance (ATR) spectrometer. Microanalyses were carried out at by the Elemental Analysis Service at London Metropolitan University. Melting points were determined in sealed glass capillaries under dinitrogen and are uncorrected. 2,6-Dicyclohexylaniline,<sup>[S1]</sup> 2,4,6-tricyclohexylaniline,<sup>[S2]</sup> Na/NaCl<sup>[S3]</sup> (5 wt%), *N*-(2,6-diisopropylphenyl)-3,3-dimethylbutan-2-imine<sup>[S4]</sup> were prepared according to their literature procedures. Unless otherwise stated, chemicals were purchased from Sigma-Aldrich and used as received.

## Preparation of *N*-(2,6-dicyclohexylphenyl)pivalamide

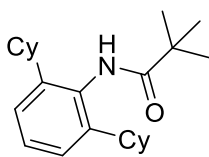

2,6-dicyclohexylaniline (20.00 g, 77.7 mmol) and triethylamine (10.80 mL, 77.7 mmol) were suspended in dichloromethane (250 mL) and transferred to a 500 mL round bottom flask fitted with a reflux condenser (under anaerobic conditions). Pivaloyl chloride (9.51 mL, 77.7 mmol) was added dropwise with vigorous stirring. Upon complete addition, the resultant mixture was heated at reflux (in a 50 °C oil bath) for 3 hours. A white precipitate formed during this period. The mixture was cooled, the reaction volume reduced by half *in vacuo*, then filtered through a glass frit. The solid material was then washed with water (3 x 75 mL), hexane (3 x 50 mL) and dried *in vacuo*. The product was obtained as a white solid that was sufficiently pure for the following synthetic procedure. **Yield:** 21.5 g, 81 %.

**M.p.:** > 260 °C

**<sup>1</sup>H NMR** (400 MHz, CDCl<sub>3</sub>): δ 1.16 – 1.44 (m, 10H, Cy-H), 1.38 (s, 9H, C(CH<sub>3</sub>)<sub>3</sub>), 1.65 – 1.89 (m, 10H, Cy-H), 2.63 – 2.50 (m, 2H, Cy-H), 6.81 (s, 1H, NHCO), 7.12 (d, J = 7.8 Hz, 2H, DCHPAr-H), 7.21 – 7.27 (m, 1H, DCHPAr-H).

**<sup>13</sup>C{<sup>1</sup>H} NMR** (101 MHz, CDCl<sub>3</sub>): δ 26.4, 27.4 (Cy-C), 28.0 (C(CH<sub>3</sub>)<sub>3</sub>), 34.0, 39.4 (Cy-C), 39.8 (C(CH<sub>3</sub>)<sub>3</sub>), 124.0, 128.1, 131.8, 145.3 (DCHPAr-C), 177.3 (NHCO).

**I.R.** (solid, cm<sup>-1</sup>): 3295 (m), 2922 (s), 2848 (s), 1640 (s), 1502 (s), 1446 (s), 1360 (m), 1308 (w), 1256 (w), 1170 (m), 1133 (w), 1103 (w), 1025 (w), 943 (m), 887 (w), 790 (m), 738 (m).

**HRMS (ESI) m/z:** [M + H]<sup>+</sup> calc. for C<sub>23</sub>H<sub>35</sub>NO: 342.2792; Found: 342.2795.

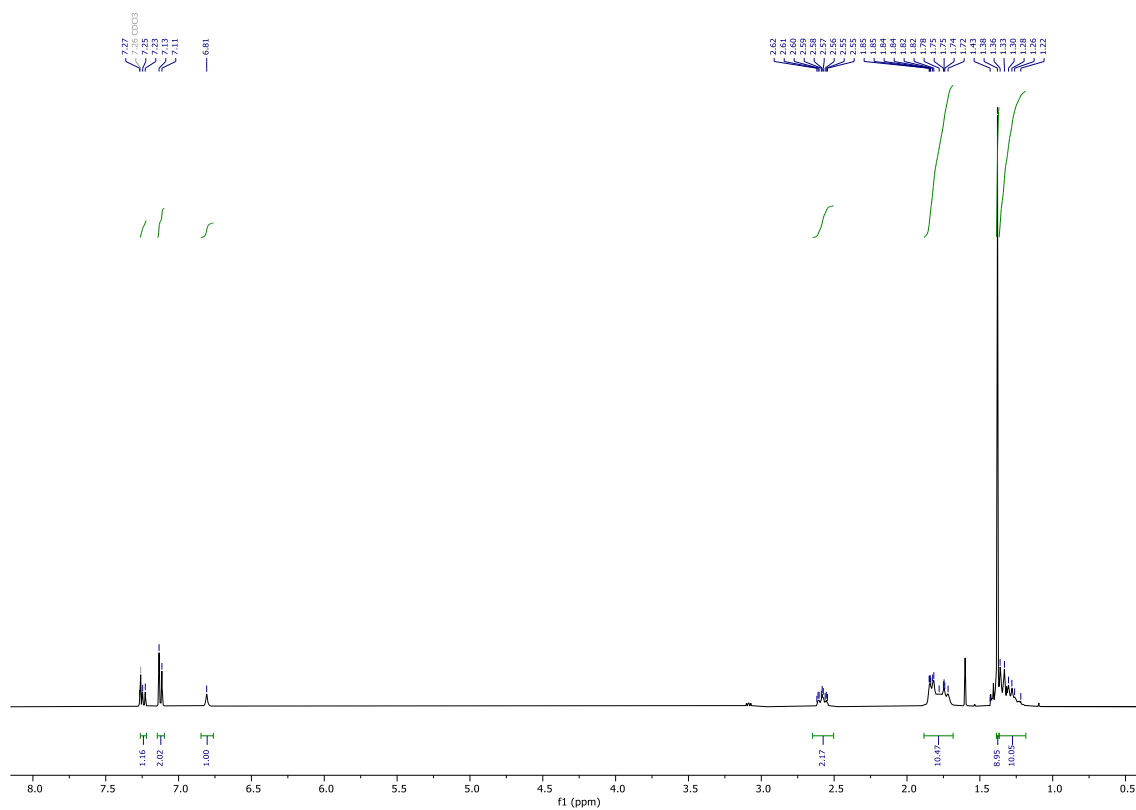

**Figure S1:**  $^1\text{H}$  NMR spectrum (400 MHz, 298 K,  $\text{CDCl}_3$ ) of *N*-(2,6-dicyclohexylphenyl)pivalamide.

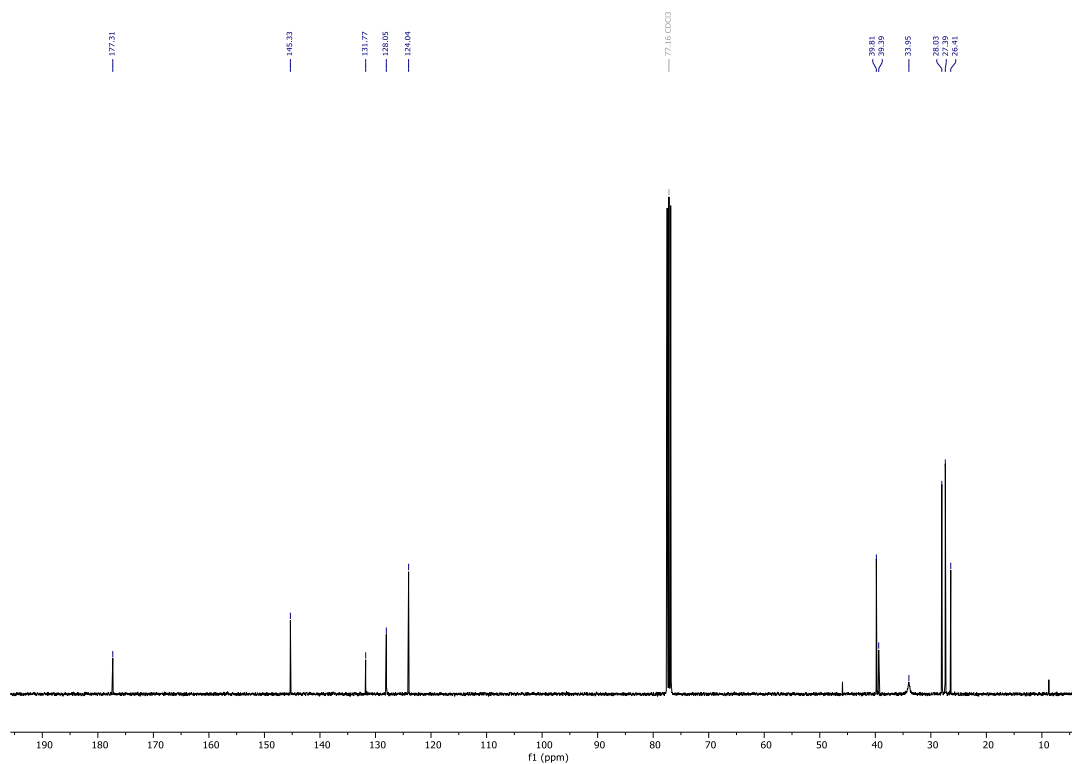

**Figure S2:**  $^{13}\text{C}\{^1\text{H}\}$  NMR spectrum (101 MHz, 298 K,  $\text{CDCl}_3$ ) of *N*-(2,6-dicyclohexylphenyl)pivalamide.

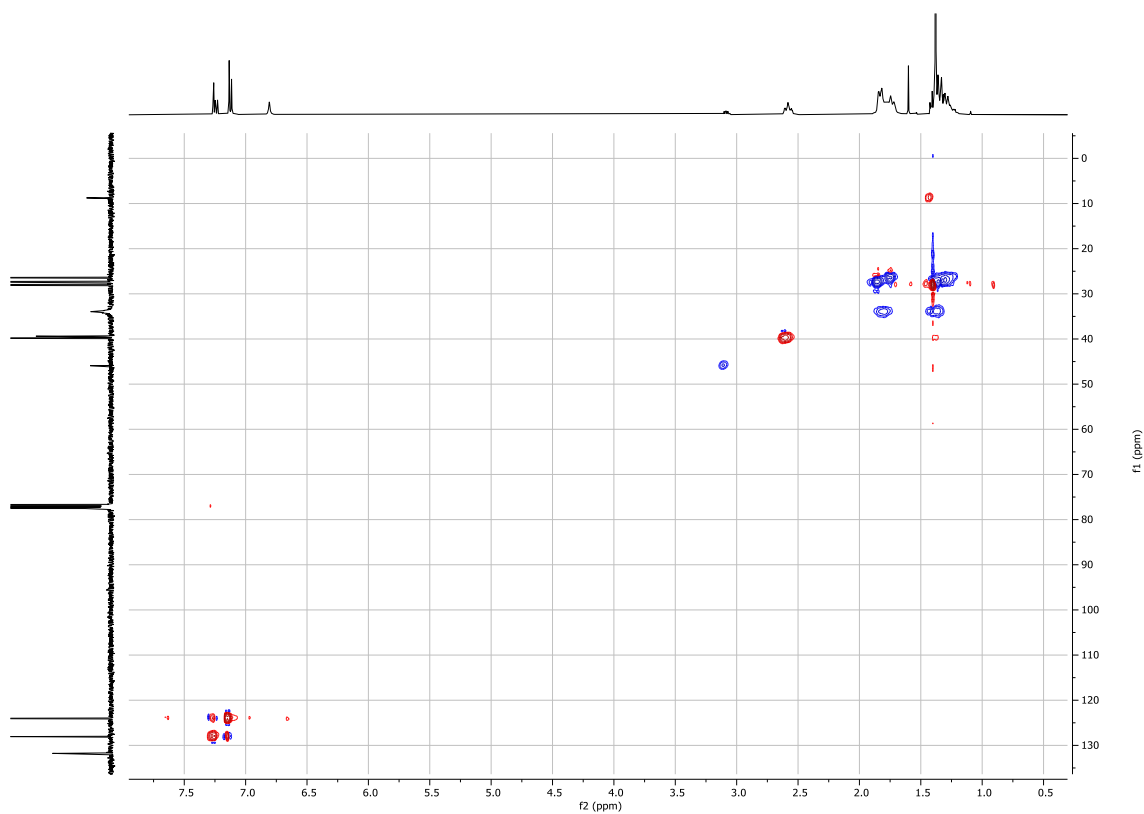

**Figure S3:** HSQC NMR spectrum (298 K, CDCl<sub>3</sub>) of *N*-(2,6-dicyclohexylphenyl)pivalamide.

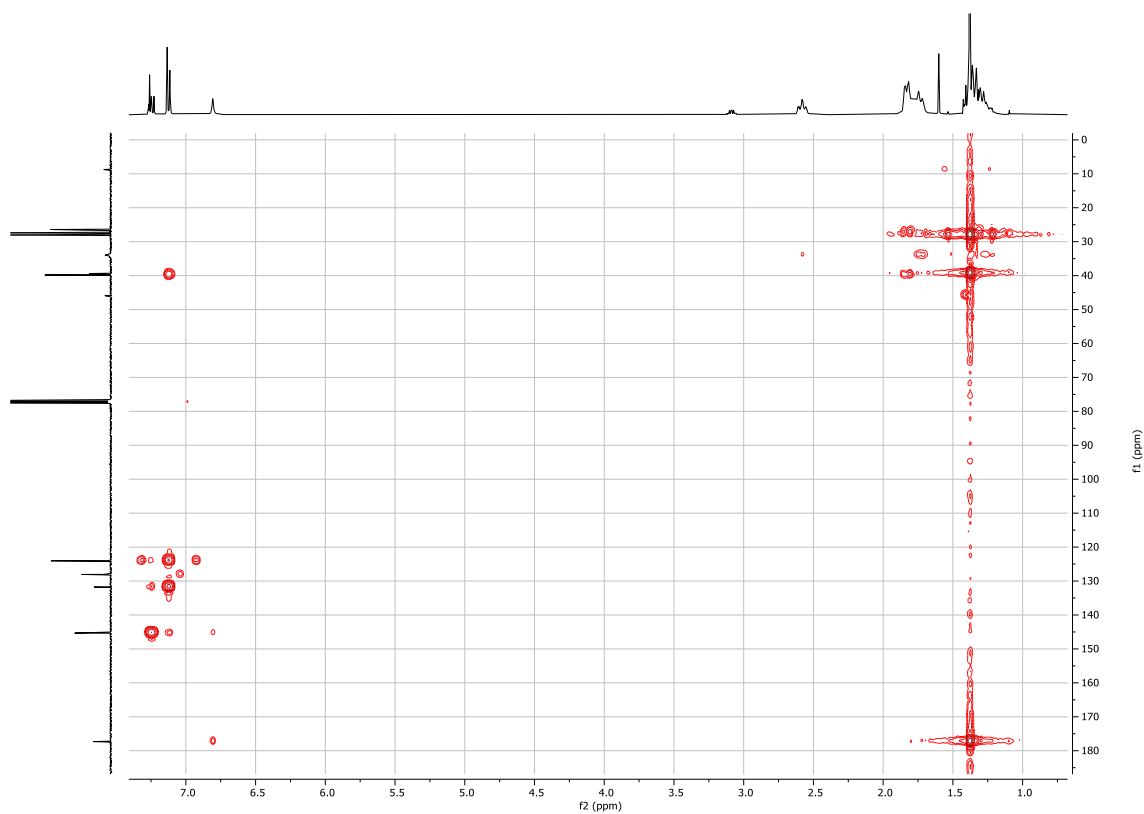

**Figure S4:** HMBC NMR spectrum (298 K, CDCl<sub>3</sub>) of *N*-(2,6-dicyclohexylphenyl)pivalamide.

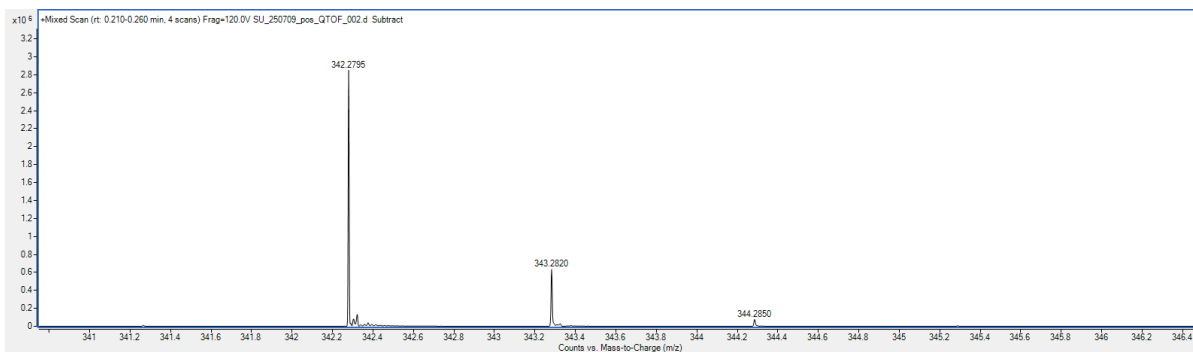

**Figure S5:** HRMS spectrum of *N*-(2,6-dicyclohexylphenyl)pivalamide.

### Preparation of *N*-(2,4,6-tricyclohexylphenyl)pivalamide

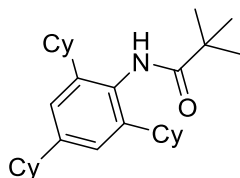

2,4,6-tricyclohexylaniline (5.00 g, 14.7 mmol) and triethylamine (2.10 mL, 15.0 mmol) were suspended in dichloromethane (150 mL) and transferred to a 500 mL round bottom flask fitted with a reflux condenser (under anaerobic conditions). Pivaloyl chloride (1.86 mL, 15.0 mmol) was added dropwise with vigorous stirring. Upon complete addition, the resultant mixture was heated at reflux (in a 50 °C oil bath) for 3 hours. A white precipitate formed during this time. The mixture was cooled and filtered through a glass frit. The solid material was washed with water (3 x 75 mL), hexane (3 x 50 mL) and then dried *in vacuo*. The product was obtained as a white solid that was sufficiently pure for the following synthetic procedure. **Yield:** 6.00 g, 96 %.

**M.p.:** > 260 °C.

**<sup>1</sup>H NMR** (400 MHz, C<sub>6</sub>D<sub>6</sub>): δ 1.20 (s, 9H, C(CH<sub>3</sub>)<sub>3</sub>), 1.22 – 1.53 (m, 14H, Cy-H), 1.59 – 2.05 (m, 16H, Cy-H), 2.52 (tt, J = 11.8, 3.4 Hz, 1H, Cy-H), 2.73 (tt, J = 11.8, 3.4 Hz, 2H, Cy-H), 6.29 (s, 1H, NHCO), 7.14 (s, 3H, TCHPAr-H).

**<sup>13</sup>C{<sup>1</sup>H} NMR** (101 MHz, C<sub>6</sub>D<sub>6</sub>): δ 26.6, 26.8, 27.4 (Cy-C), 27.8 (C(CH<sub>3</sub>)<sub>3</sub>), 28.0, 34.4, 35.0 (Cy-C), 39.2 (C(CH<sub>3</sub>)<sub>3</sub>), 40.3, 45.2 (Cy-C), 122.6, 130.5, 145.5, 147.5 (TCHPAr-C), 176.7 (NHCO).

**I.R.** (solid, cm<sup>-1</sup>): 3293 (m), 2920 (s), 2845 (s), 2588 (w), 2485 (w), 1635 (s), 1506 (s), 1471 (s), 1438 (s), 1396 (w), 1361 (m), 1240 (w), 1170 (w), 1032 (w), 957 (m), 935 (m), 854 (w), 806 (w), 656 (s).

**HRMS (ESI) m/z:** [M + H]<sup>+</sup> calc. for C<sub>29</sub>H<sub>45</sub>NO: 423.3574; Found: 424.3606.

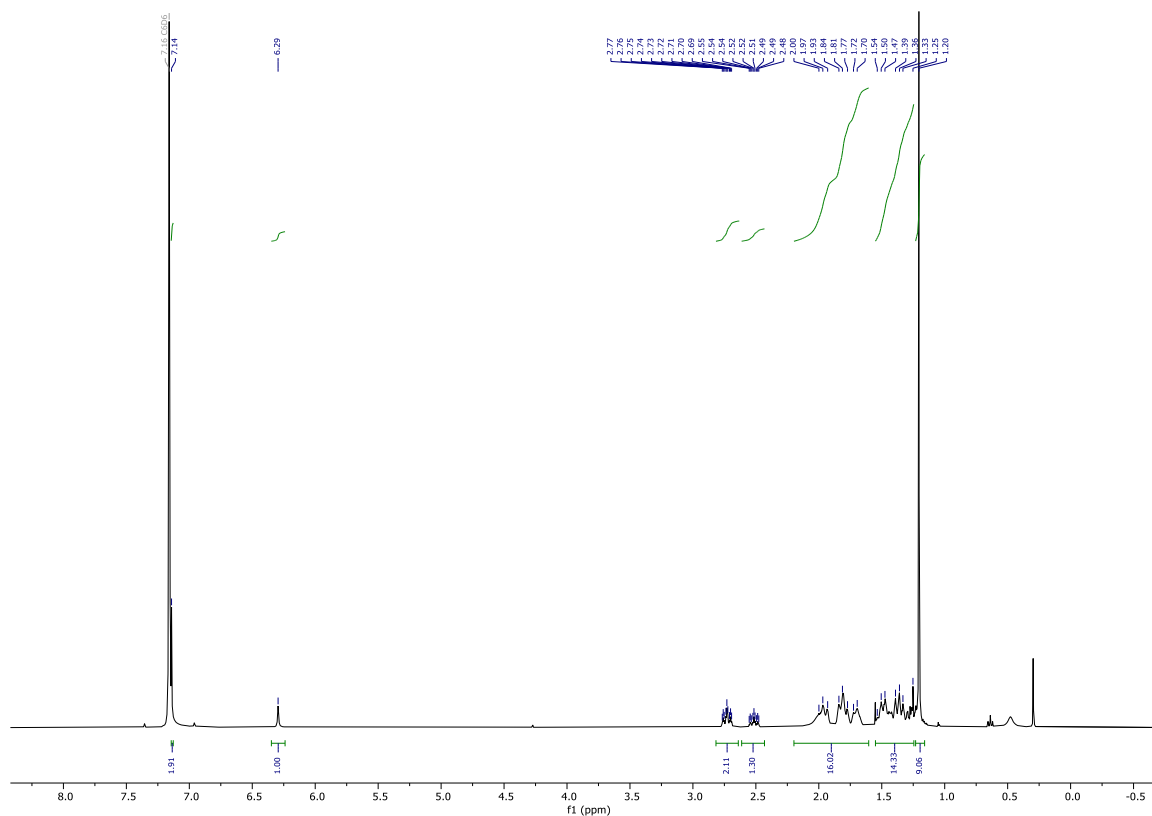

**Figure S6:**  $^1\text{H}$  NMR spectrum (400 MHz, 298 K,  $\text{C}_6\text{D}_6$ ) of *N*-(2,4,6-tricyclohexylphenyl)pivalamide.

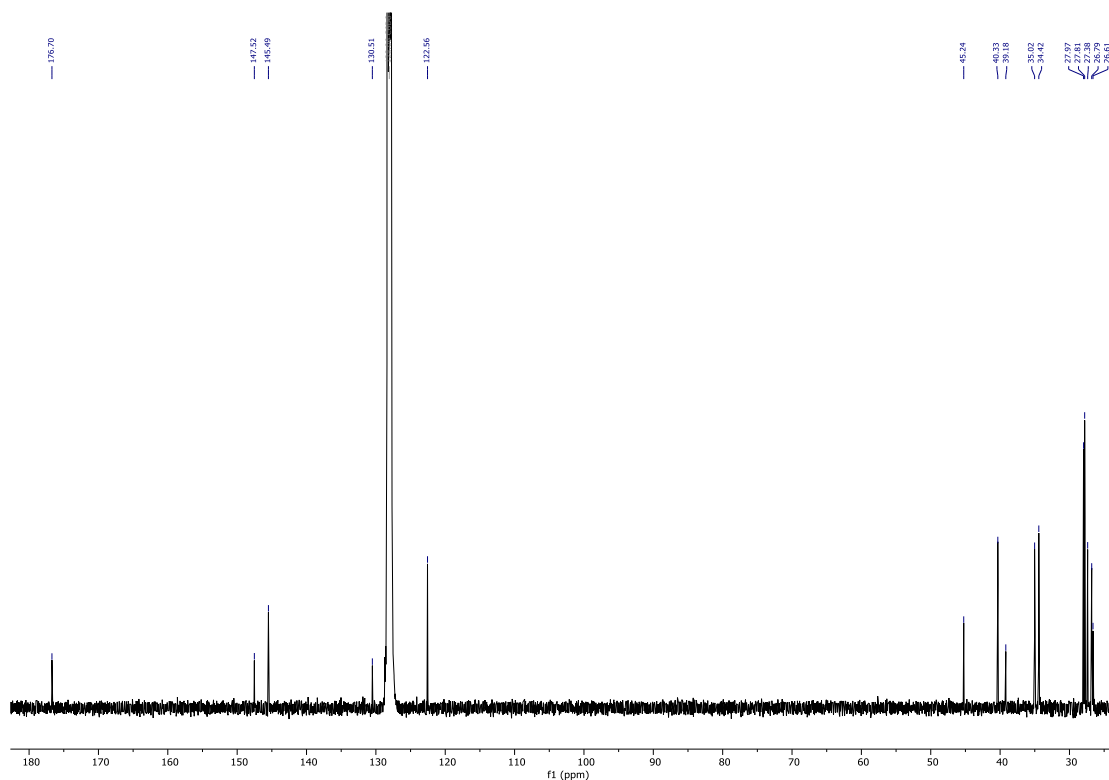

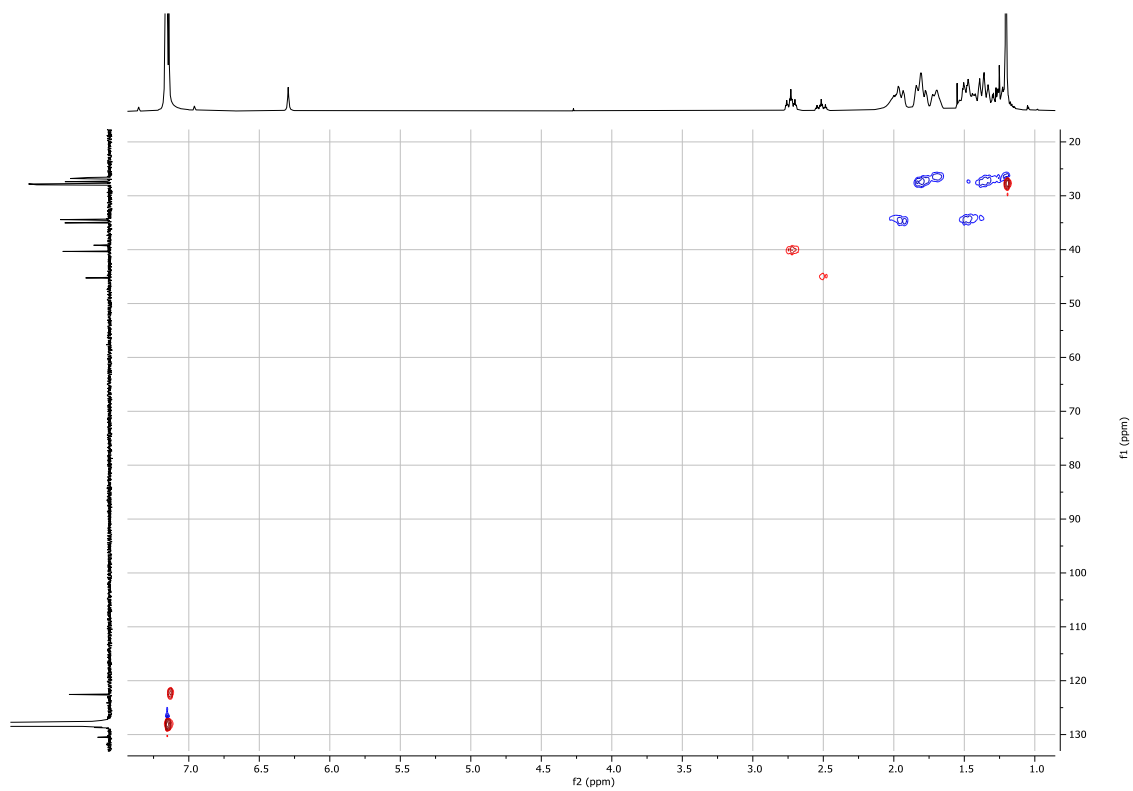

Figure S8: HSQC NMR spectrum (298 K, C<sub>6</sub>D<sub>6</sub>) of *N*-(2,4,6-tricyclohexylphenyl)pivalamide.

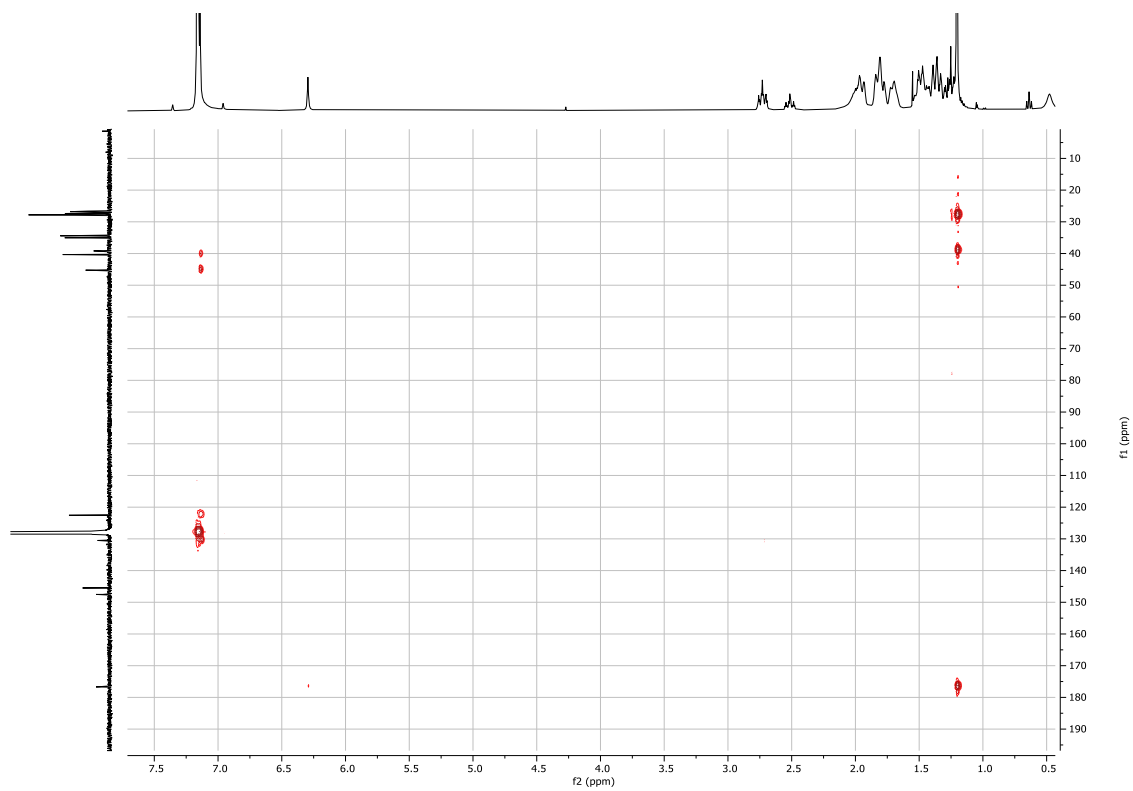

Figure S9: HMBC NMR spectrum (298 K, C<sub>6</sub>D<sub>6</sub>) of *N*-(2,4,6-tricyclohexylphenyl)pivalamide.

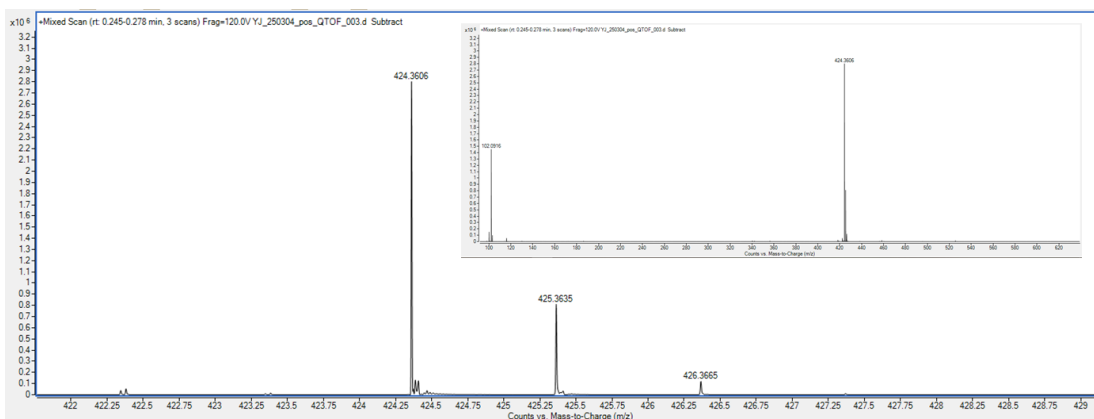

**Figure S10:** HRMS spectrum of *N*-(2,4,6-tricyclohexylphenyl)pivalamide.

### Preparation of *N*-(2,6-dicyclohexylphenyl)pivalimidoyl chloride

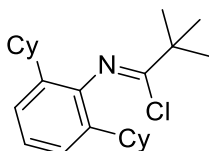

*N*-(2,6-dicyclohexylphenyl)pivalamide (21.50 g, 0.063 mol) was dissolved in toluene (~200 mL) and stirred under an inert atmosphere. To this suspension was added phosphorus pentachloride (19.66 g, 0.094 mol) in one portion. The reaction mixture was heated at reflux for 16 hours to give a clear yellow solution. Volatiles were removed *in vacuo* and the residue heated under vacuum at 90 °C for 2 hours. The residue was then dissolved in diethyl ether (~100 mL) and the product obtained as a pale-yellow solid by fractional crystallisation. **Yield:** 17.95 g, 79 %.

**M.p.:** 94–95 °C.

**<sup>1</sup>H NMR** (400 MHz, C<sub>6</sub>D<sub>6</sub>): δ 1.06 – 1.34 (m, 8H, Cy-H), 1.36 (s, 9H, C(CH<sub>3</sub>)<sub>3</sub>), 1.40 – 1.54 (m, 2H, Cy-H), 1.61 – 1.83 (m, 6H, Cy-H), 1.89 – 2.04 (m, 4H, Cy-H), 2.44 – 2.61 (m, 2H, Cy-H), 7.12 – 7.15 (m, 3H, DCHPAr-H).

**<sup>13</sup>C{<sup>1</sup>H} NMR** (101 MHz, C<sub>6</sub>D<sub>6</sub>): δ 26.7, 27.7 (Cy-C), 28.6 (C(CH<sub>3</sub>)<sub>3</sub>), 33.5, 33.8, 39.9 (Cy-C), 44.1 (C(CH<sub>3</sub>)<sub>3</sub>), 124.1, 125.0, 135.8, 143.9 (DCHPAr-C), 154.5 (NCCl).

**I.R.** (solid, cm<sup>-1</sup>): 2972 (w), 2920 (s), 2843 (s), 1981 (w), 1700 (s), 1460 (m), 1441 (s), 1360 (w), 1243 (w), 1031 (w), 995 (w), 931 (m), 856 (s), 818 (s), 629 (m).

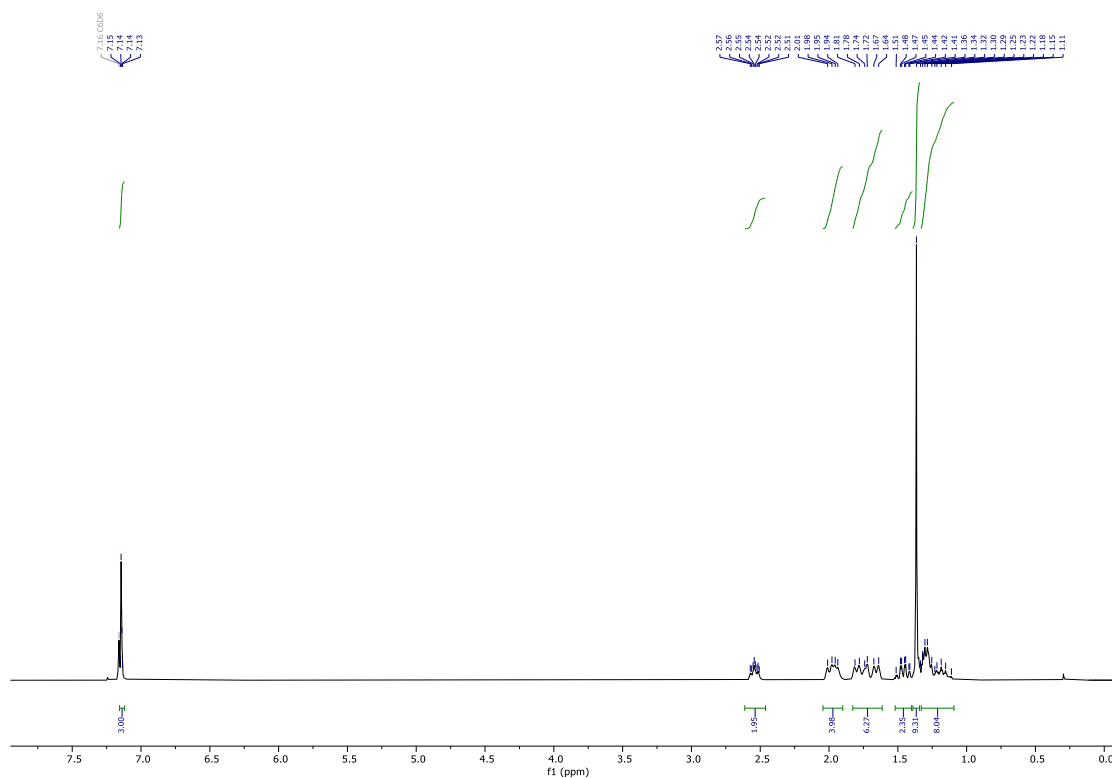

**Figure S11:**  $^1\text{H}$  NMR spectrum (400 MHz, 298 K,  $\text{C}_6\text{D}_6$ ) of *N*-(2,6-dicyclohexylphenyl)pivalimidoyl chloride.

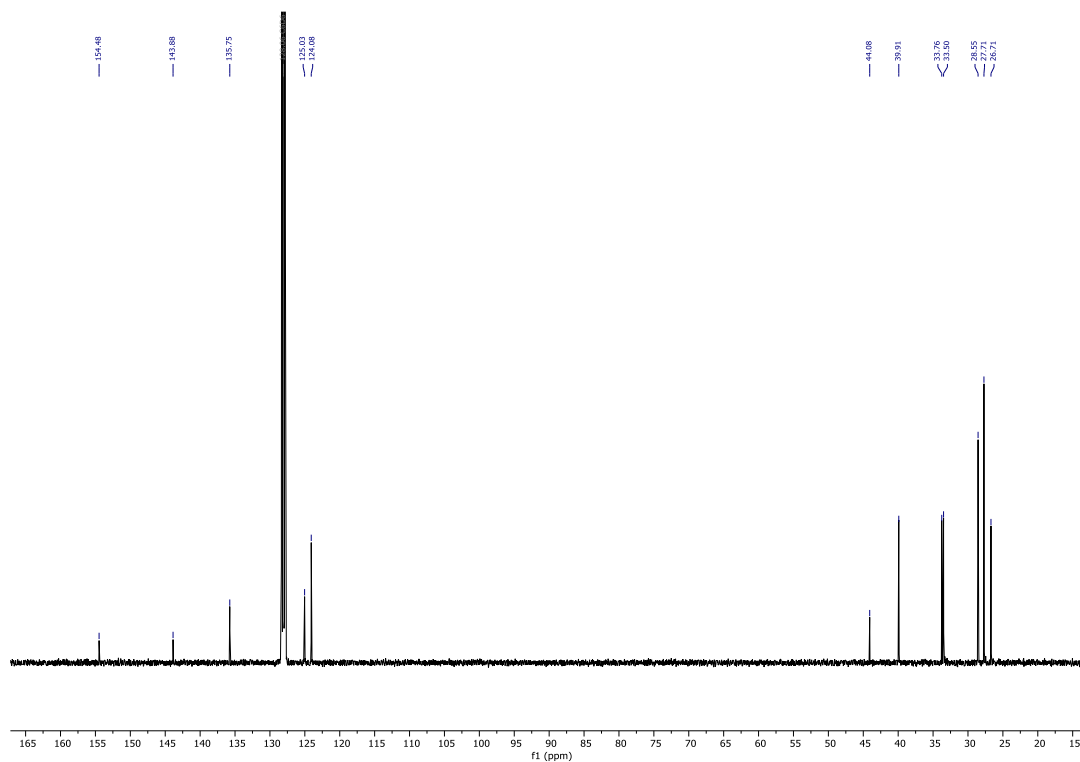

**Figure S12:**  $^{13}\text{C}\{^1\text{H}\}$  NMR spectrum (101 MHz, 298 K,  $\text{C}_6\text{D}_6$ ) of *N*-(2,6-dicyclohexylphenyl)pivalimidoyl chloride.

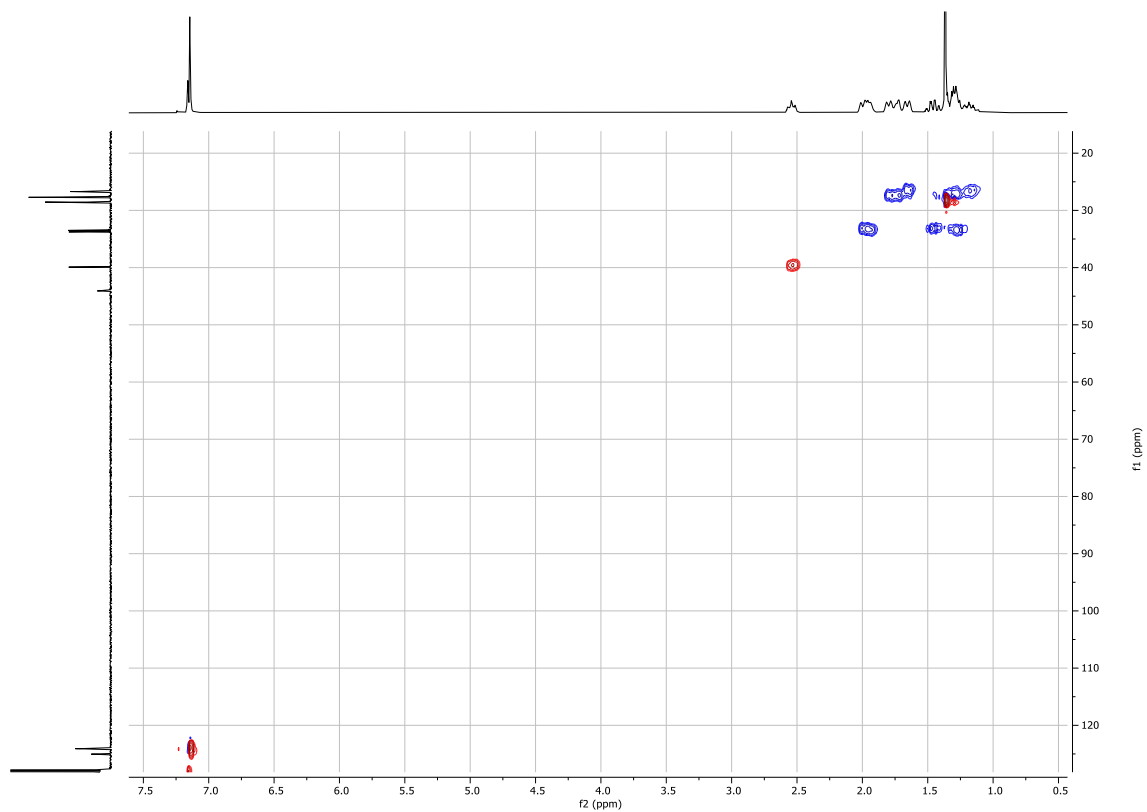

**Figure S13:** HSQC NMR spectrum (298 K,  $C_6D_6$ ) of *N*-(2,6-dicyclohexylphenyl)pivalimidoyl chloride.

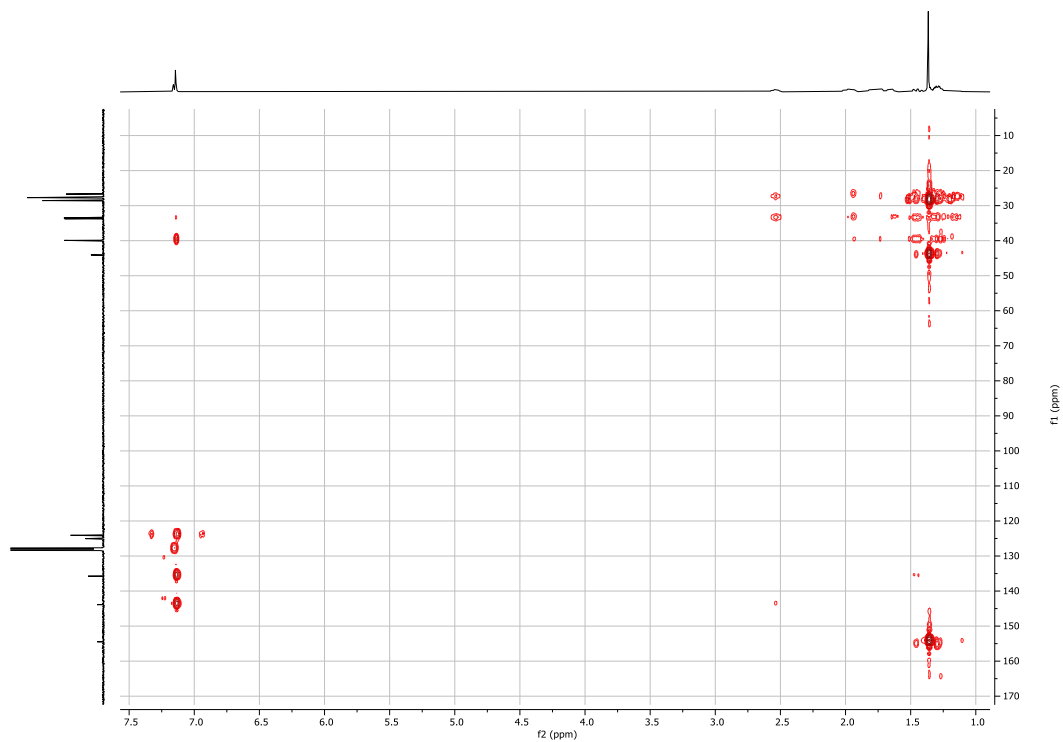

**Figure S14:** HMBC NMR spectrum (298 K,  $C_6D_6$ ) of *N*-(2,6-dicyclohexylphenyl)pivalimidoyl chloride.

## Preparation of *N*-(2,4,6-tricyclohexylphenyl)pivalimidoyl chloride

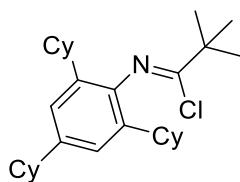

*N*-(2,4,6-tricyclohexylphenyl)pivalamide (5.00 g, 0.011 mol) was dissolved in toluene (~200 mL) and stirred under an inert atmosphere. To this suspension was added phosphorus pentachloride (3.53 g, 0.017 mol) in one portion. The reaction mixture was heated at reflux for 16 hours to give a clear yellow solution. Volatiles were removed *in vacuo* and the residue heated under vacuum at 90 °C for 2 hours. The residue was then dissolved in diethyl ether (~100 mL) and the product obtained as a pale-yellow solid by fractional crystallisation. **Yield:** 4.50 g, 87%.

**M.p.:** > 260 °C

**<sup>1</sup>H NMR** (400 MHz, C<sub>6</sub>D<sub>6</sub>) δ 1.18 – 1.36 (m, 8H, Cy-H), 1.38 (s, 9H, C(CH<sub>3</sub>)<sub>3</sub>), 1.44 – 2.12 (m, 22H, Cy-H), 2.40 – 2.67 (m, 3H, Cy-H), 7.15 (s, 2H, TCHPAr-H).

**<sup>13</sup>C{<sup>1</sup>H} NMR** (101 MHz, C<sub>6</sub>D<sub>6</sub>): δ 26.7, 26.8, 27.4, 27.8 (Cy-C), 28.6 (C(CH<sub>3</sub>)<sub>3</sub>), 33.7, 33.9, 35.2, 40.1 (Cy-C), 44.1 (C(CH<sub>3</sub>)<sub>3</sub>), 45.2 (Cy-C), 122.4, 135.5, 141.9, 144.3 (TCHPAr-C), 154.2 (NCCl).

**I.R.** (solid, cm<sup>-1</sup>): 2972 (w), 2920 (s), 2843 (s), 1981 (w), 1700 (s), 1460 (m), 1441 (s), 1360 (w), 1243 (w), 1031 (w), 995 (w), 931 (m), 856 (s), 818 (s), 629 (m).

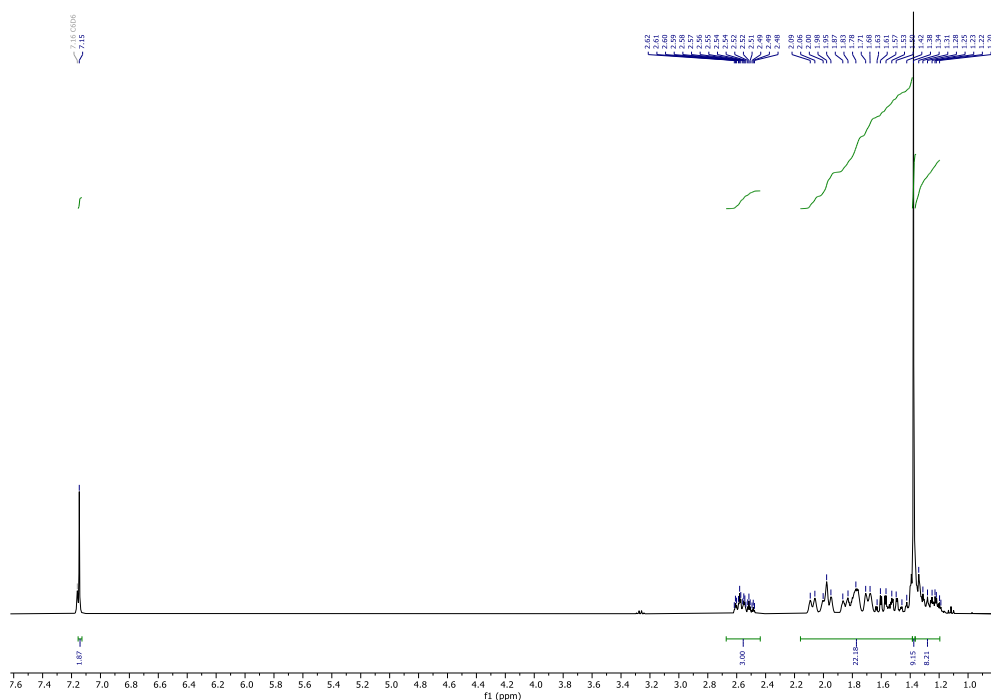

**Figure S15:** <sup>1</sup>H NMR spectrum (400 MHz, 298 K, C<sub>6</sub>D<sub>6</sub>) of *N*-(2,4,6-tricyclohexylphenyl)pivalimidoyl chloride.

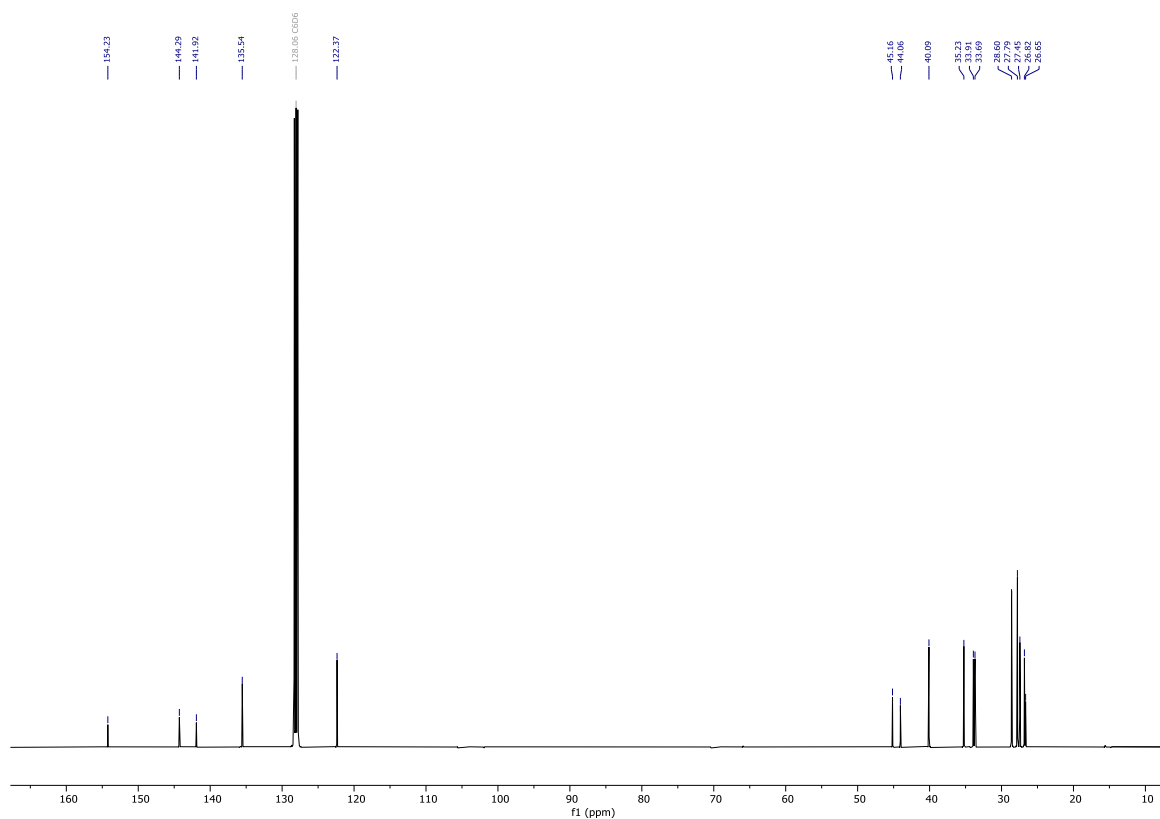

**Figure S16:**  $^{13}\text{C}\{^1\text{H}\}$  NMR spectrum (101 MHz, 298 K,  $\text{C}_6\text{D}_6$ ) of *N*-(2,4,6-tricyclohexylphenyl)pivalimidoyl chloride.

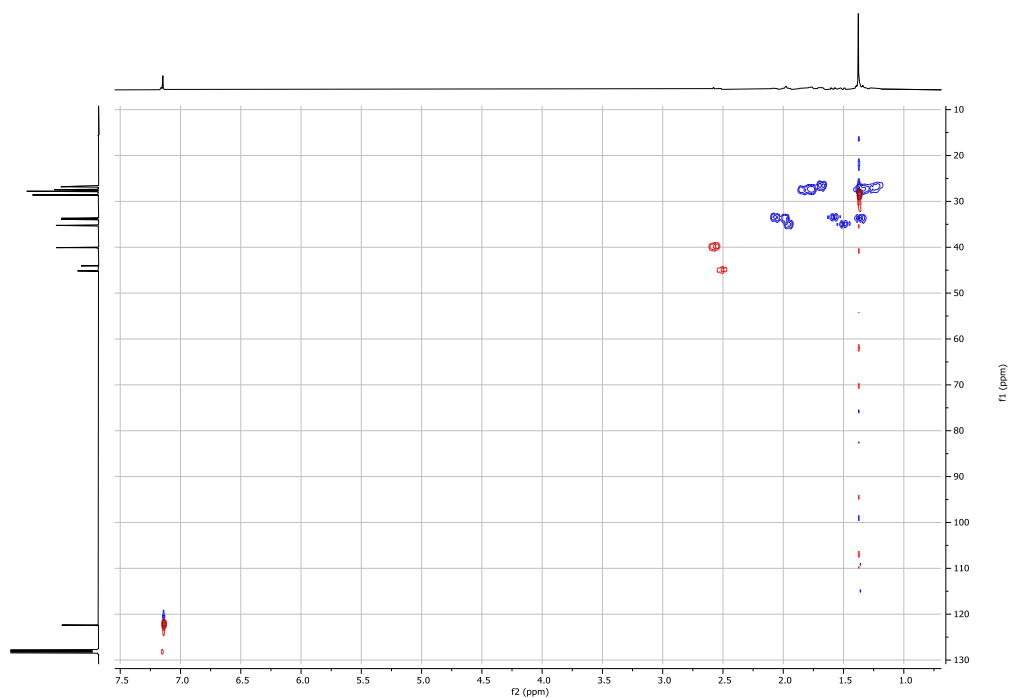

**Figure S17:** HSQC NMR spectrum (298 K,  $\text{C}_6\text{D}_6$ ) of *N*-(2,4,6-tricyclohexylphenyl)pivalimidoyl chloride.

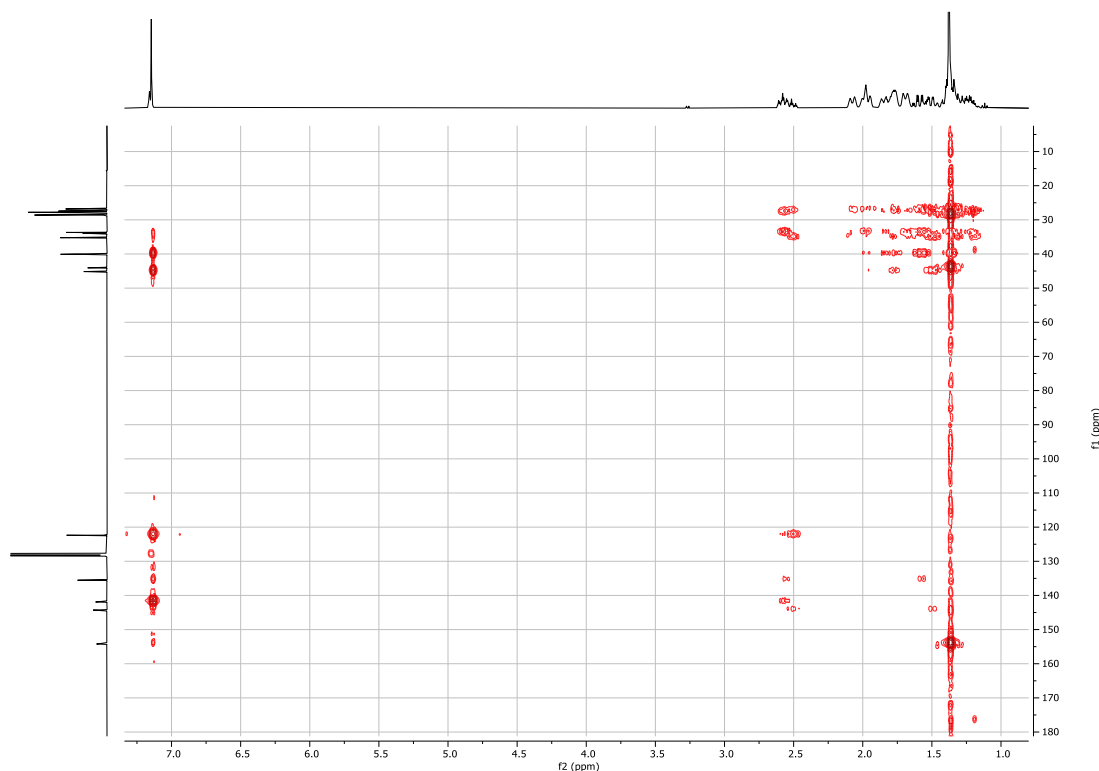

**Figure S18:** HMBC NMR spectrum (298 K,  $C_6D_6$ ) of *N*-(2,4,6-tricyclohexylphenyl)pivalimidoyl chloride.

### Preparation of *N*-(2,6-dicyclohexylphenyl)-3,3-dimethylbutan-2-imine

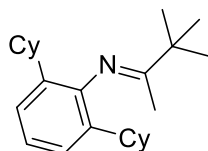

*N*-(2,6-dicyclohexylphenyl)pivalimidoyl chloride (11.00 g, 0.031 mol) was dissolved in diethyl ether (~200 mL) and cooled to  $-78$  °C. To this mixture was added a solution of methyl magnesium bromide (3M in  $Et_2O$ , 13.3 mL, 0.040 mol). The mixture was allowed to warm to room temperature and stirred for 16 hours. The mixture was then cooled to 0 °C in an ice bath and water (~50 mL) added slowly. The organic layer was extracted with diethyl ether (3 x 100 mL), dried over anhydrous  $MgSO_4$  and filtered. Volatiles were removed *in vacuo* and the obtained off-white solid used without further purification.

**Yield:** 10.01 g, 96 %.

**M.p.:** 84–86 °C

$^1H$  NMR (400 MHz,  $CDCl_3$ ):  $\delta$  1.17 – 1.28 (m, 8H, Cy-H), 1.29 (s, 9H, C(CH<sub>3</sub>)<sub>3</sub>), 1.52 – 1.63 (m, 4H, Cy-H), 1.65 (s, 3H, NCCH<sub>3</sub>), 1.68 – 1.92 (m, 8H, Cy-H), 2.20 – 2.31 (m, 2H, Cy-H), 6.94 – 7.01 (m, 1H, DCHPAr-H), 7.02 – 7.07 (m, 2H, DCHPAr-H).

$^{13}\text{C}\{^1\text{H}\}$  NMR (101 MHz,  $\text{CDCl}_3$ ):  $\delta$  16.1 ( $\text{NCCH}_3$ ), 26.5, 27.3, 27.5 ( $\text{Cy-C}$ ), 28.3 ( $\text{C(CH}_3)_3$ ), 33.3, 33.4, 39.0 ( $\text{Cy-C}$ ), 40.6 ( $\text{C(CH}_3)_3$ ), 122.7, 123.5, 135.0, 146.9 ( $\text{DCHPAr-C}$ ), 176.6 ( $\text{NC}$ ).

**I.R.** (solid,  $\text{cm}^{-1}$ ): 2918 (s), 2847 (s), 1647 (s), 1442 (s), 1364 (s), 1308 (w), 1259 (w), 1230 (m), 1181 (w), 1140 (s), 1092 (w), 1028 (w), 943 (w), 887 (w), 793 (m), 760 (s), 700 (w).

**HRMS (ESI) m/z:**  $[\text{M} + \text{H}]^+$  calc. for  $\text{C}_{24}\text{H}_{37}\text{N}$ : 340.2999; Found: 340.3004.

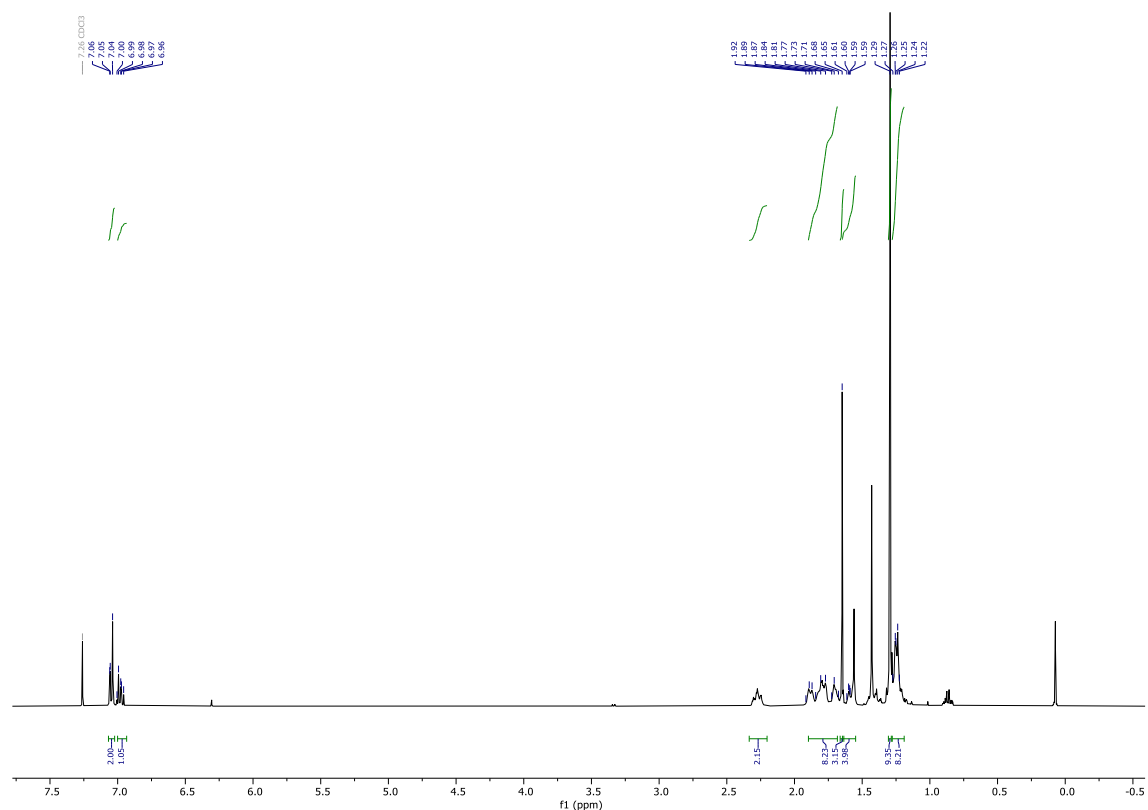

**Figure S19:**  $^1\text{H}$  NMR spectrum (400 MHz, 298 K,  $\text{CDCl}_3$ ) of *N*-(2,6-dicyclohexylphenyl)-3,3-dimethylbutan-2-imine.

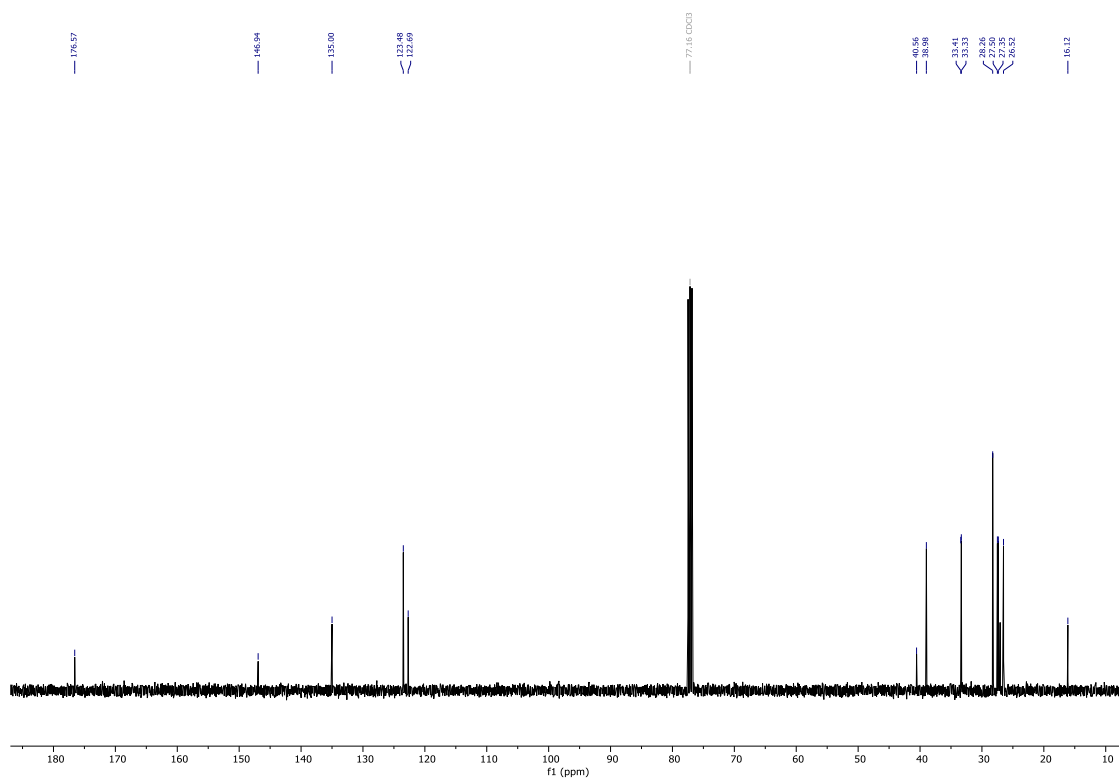

**Figure S20:**  $^{13}\text{C}\{^1\text{H}\}$  NMR spectrum (101 MHz, 298 K,  $\text{CDCl}_3$ ) of *N*-(2,6-dicyclohexylphenyl)-3,3-dimethylbutan-2-imine.

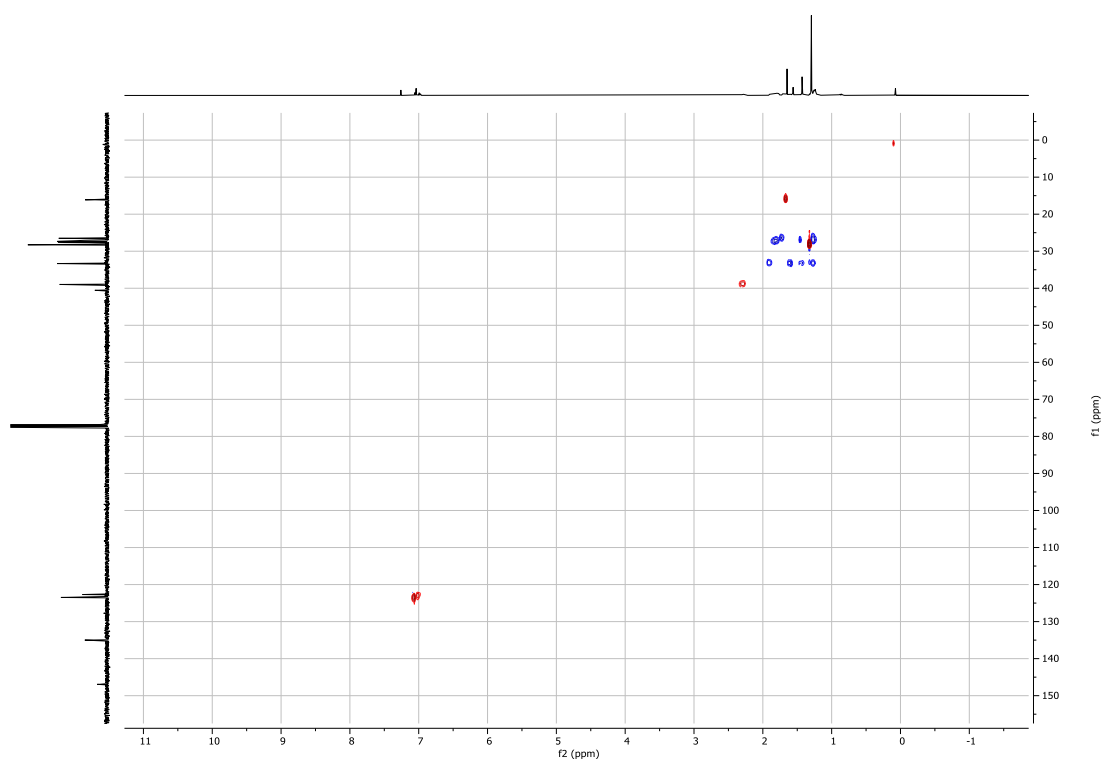

**Figure S21:** HSQC NMR spectrum (298 K,  $\text{CDCl}_3$ ) of *N*-(2,6-dicyclohexylphenyl)-3,3-dimethylbutan-2-imine.

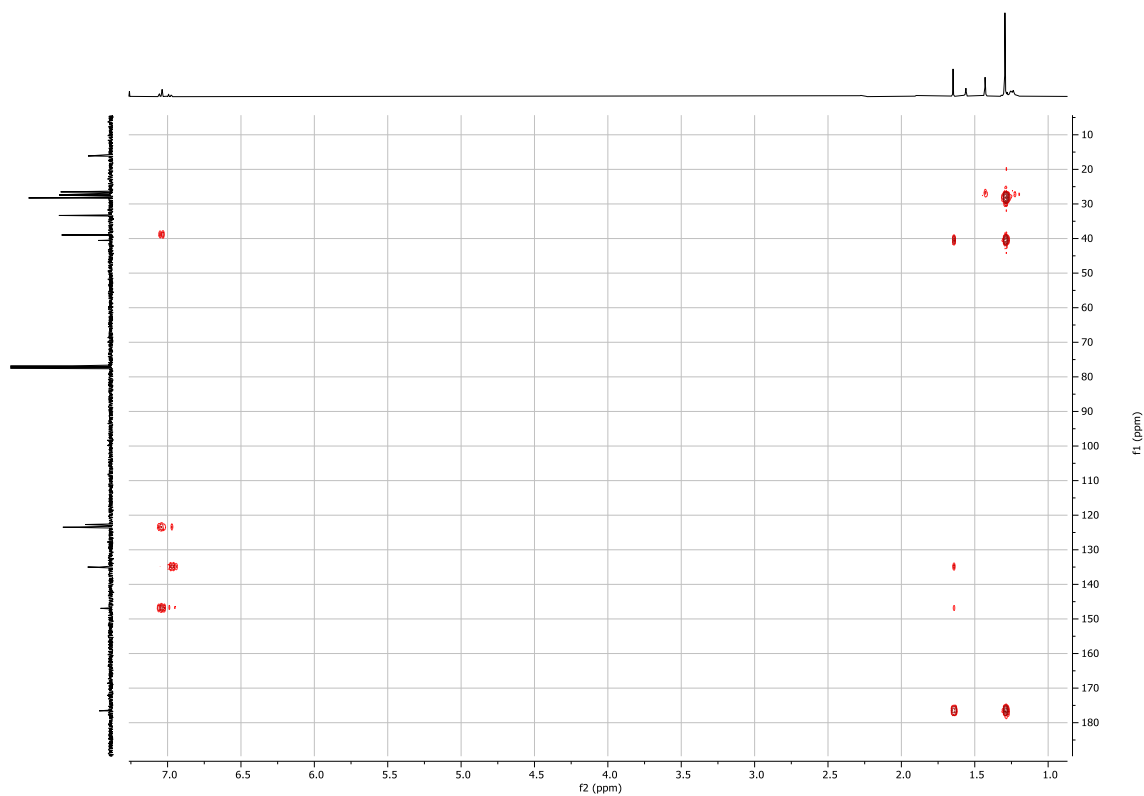

**Figure S22:** HMBC NMR spectrum (298 K, CDCl<sub>3</sub>) of *N*-(2,6-dicyclohexylphenyl)-3,3-dimethylbutan-2-imine.

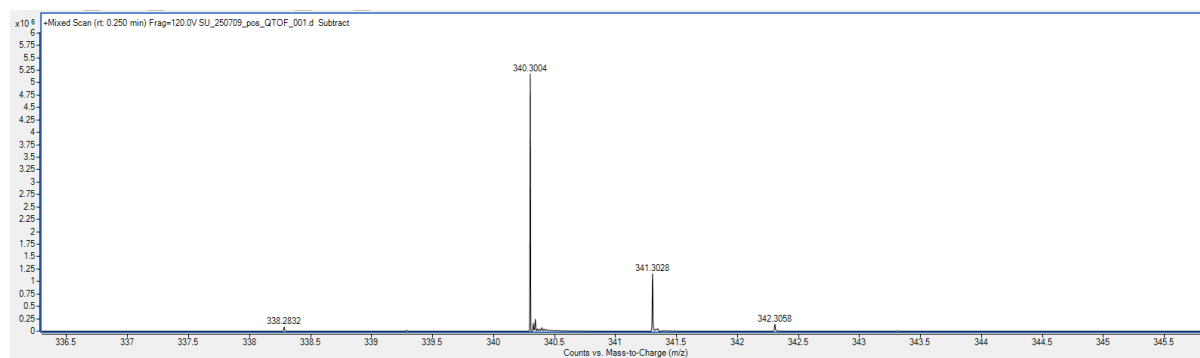

**Figure S23:** HRMS spectrum of *N*-(2,6-dicyclohexylphenyl)-3,3-dimethylbutan-2-imine.

### Preparation of *N*-(2,4,6-tricyclohexylphenyl)-3,3-dimethylbutan-2-imine

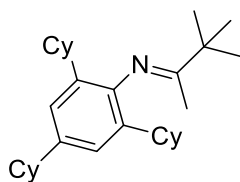

*N*-(2,4,6-tricyclohexylphenyl)pivalimidoyl chloride (4.00 g, 0.009 mol) was dissolved in diethyl ether (~200 mL) and cooled to  $-78$  °C. To this mixture was added a solution of methyl magnesium bromide (3M in Et<sub>2</sub>O, 6.45 mL, 0.019 mol). The mixture was allowed to warm to room temperature and stirred for 16 hours. The mixture was then cooled to 0 °C in an ice bath and water (~50 mL) added slowly. The organic layer was extracted with diethyl ether (3 x 100 mL), dried over anhydrous MgSO<sub>4</sub> and filtered. Volatiles were removed *in vacuo* and the obtained off-white solid used without further purification. **Yield:** 3.50 g, 92%.

**M.p.:** 150–152 °C.

**<sup>1</sup>H NMR** (400 MHz, CDCl<sub>3</sub>):  $\delta$  1.14 – 1.25 (m, 8H, Cy-H), 1.28 (s, 9H, C(CH<sub>3</sub>)<sub>3</sub>), 1.34 – 1.50 (m, 6H, Cy-H), 1.53 – 1.62 (m, 2H, Cy-H), 1.65 (s, 3H, CH<sub>3</sub>), 1.67 – 1.94 (m, 14H, Cy-H), 2.15 – 2.32 (m, 2H, Cy-H), 2.36 – 2.48 (m, 1H, Cy-H), 6.86 (s, 2H, TCHPAr-H).

**<sup>13</sup>C{<sup>1</sup>H} NMR** (101 MHz, CDCl<sub>3</sub>):  $\delta$  16.1 (CH<sub>3</sub>), 26.5, 26.6, 27.2, 27.4, 27.6 (Cy-C), 28.3 (C(CH<sub>3</sub>)<sub>3</sub>), 33.4, 33.5, 34.9, 39.1 (Cy-C), 40.5 (C(CH<sub>3</sub>)<sub>3</sub>), 44.6 (Cy-C), 121.8, 134.4, 142.0, 144.5 (TCHPAr-C), 176.3 (NC).

**I.R.** (solid, cm<sup>-1</sup>): 2965 (w), 2919 (s), 2846 (s), 1654 (s), 1444 (s), 1360 (m), 1240 (w), 1146 (s), 1031 (w), 952 (w), 885 (m), 843 (m), 808 (s), 706 (w), 629 (w).

**HRMS (ESI) m/z:** [M + H]<sup>+</sup> calc. for C<sub>30</sub>H<sub>47</sub>N: 422.3782; Found: 422.3813.

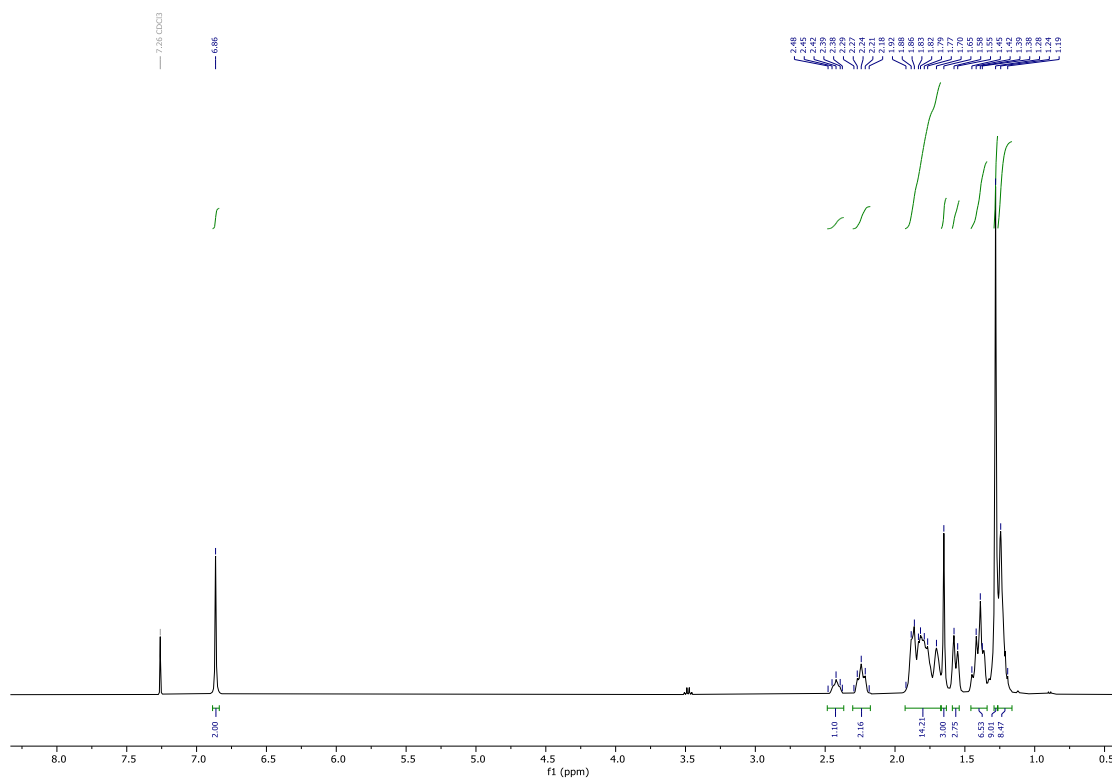

**Figure S24:**  $^1\text{H}$  NMR spectrum (400 MHz, 298 K,  $\text{CDCl}_3$ ) of *N*-(2,4,6-tricyclohexylphenyl)-3,3-dimethylbutan-2-imine

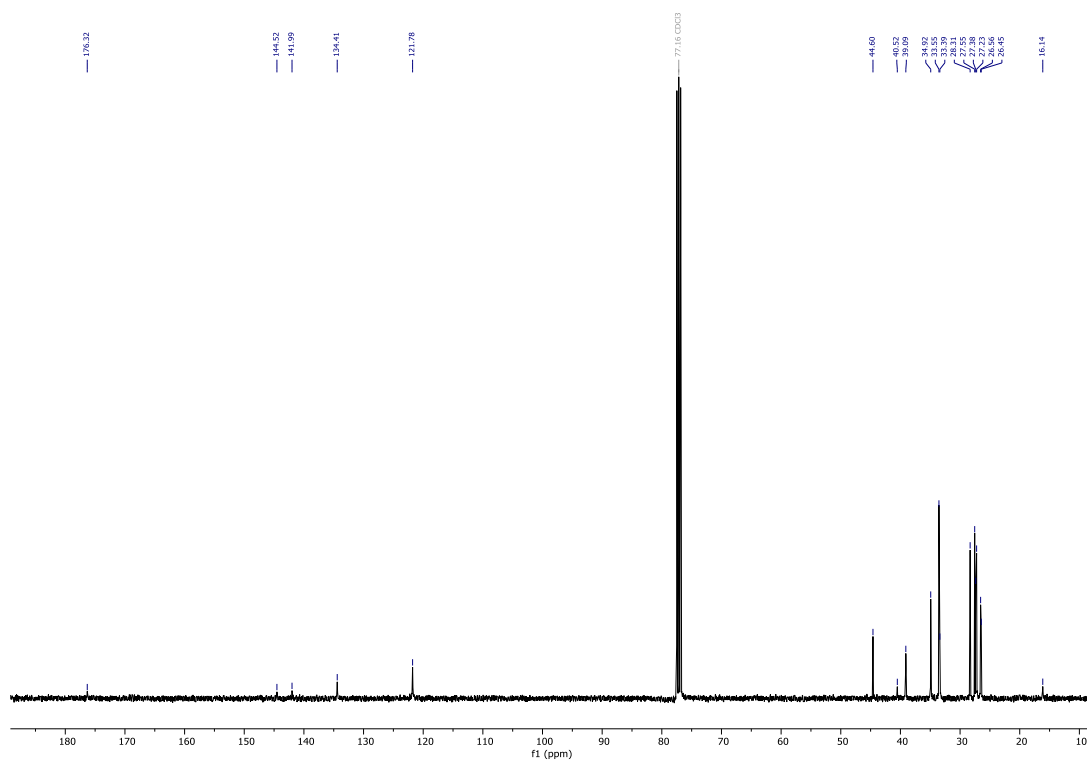

**Figure S25:**  $^{13}\text{C}\{^1\text{H}\}$  NMR spectrum (101 MHz, 298 K,  $\text{CDCl}_3$ ) of *N*-(2,4,6-tricyclohexylphenyl)-3,3-dimethylbutan-2-imine

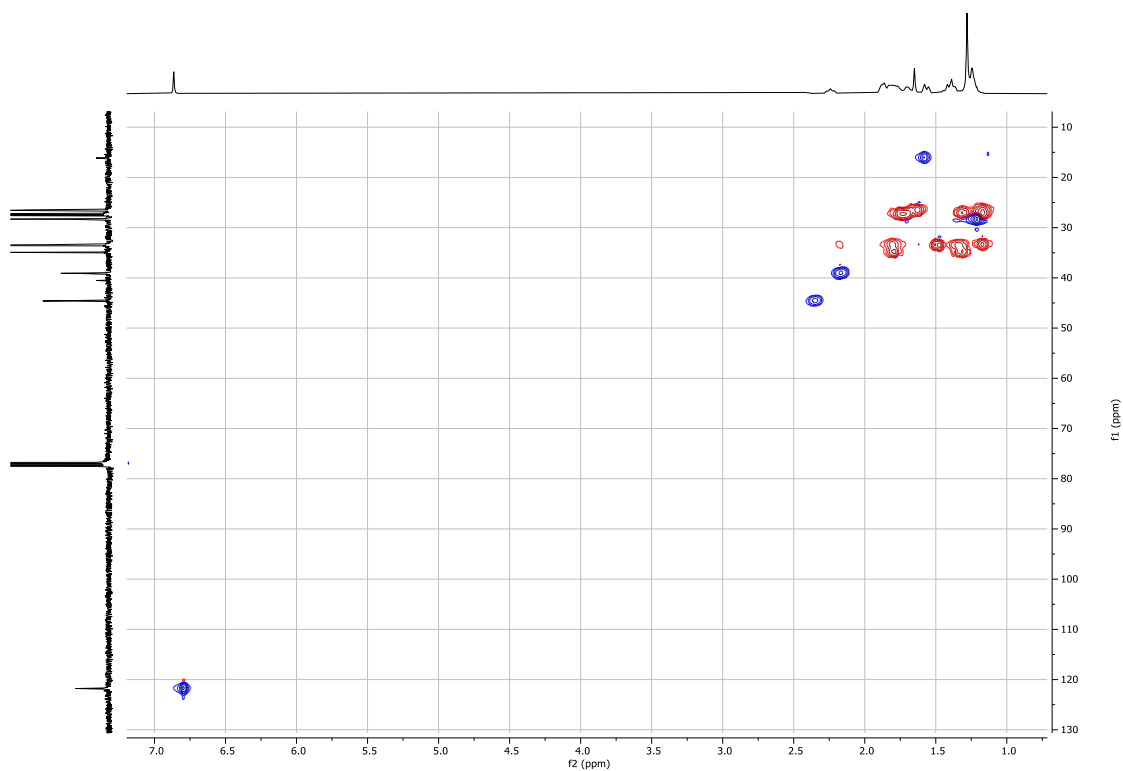

**Figure S26:** HSQC NMR spectrum (298 K,  $\text{CDCl}_3$ ) of *N*-(2,4,6-tricyclohexylphenyl)-3,3-dimethylbutan-2-imine

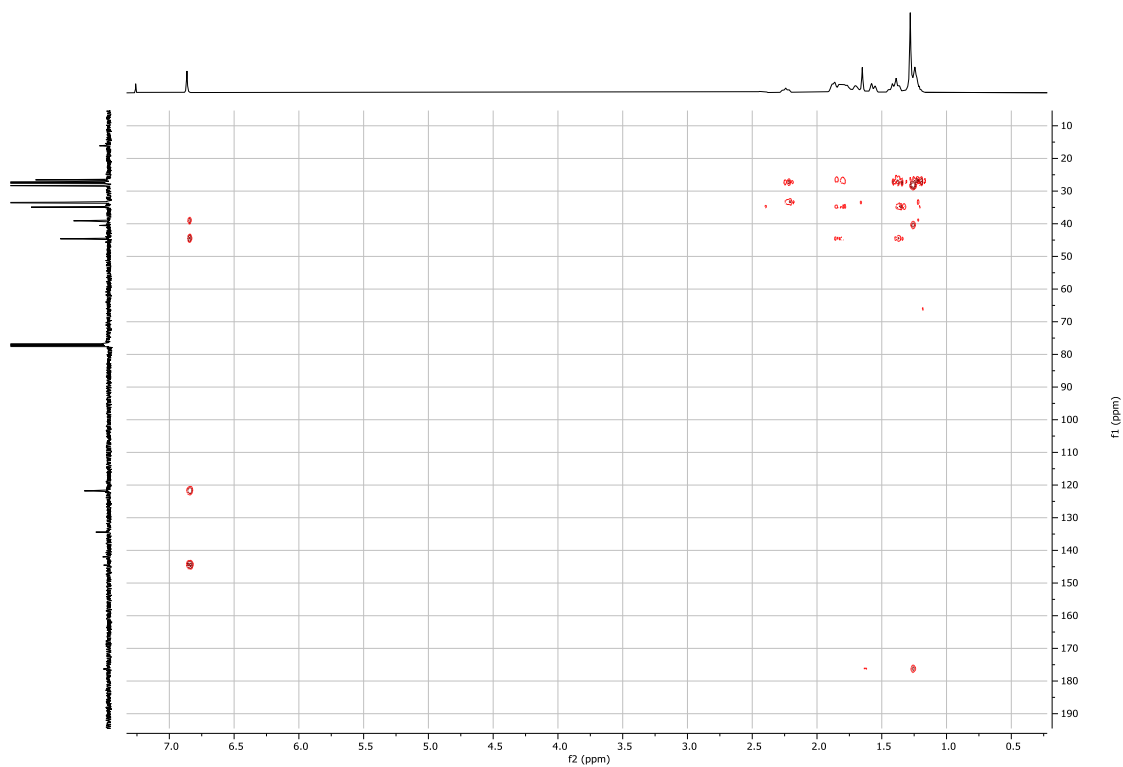

**Figure S27:** HMBC NMR spectrum (298 K,  $\text{CDCl}_3$ ) of *N*-(2,4,6-tricyclohexylphenyl)-3,3-dimethylbutan-2-imine

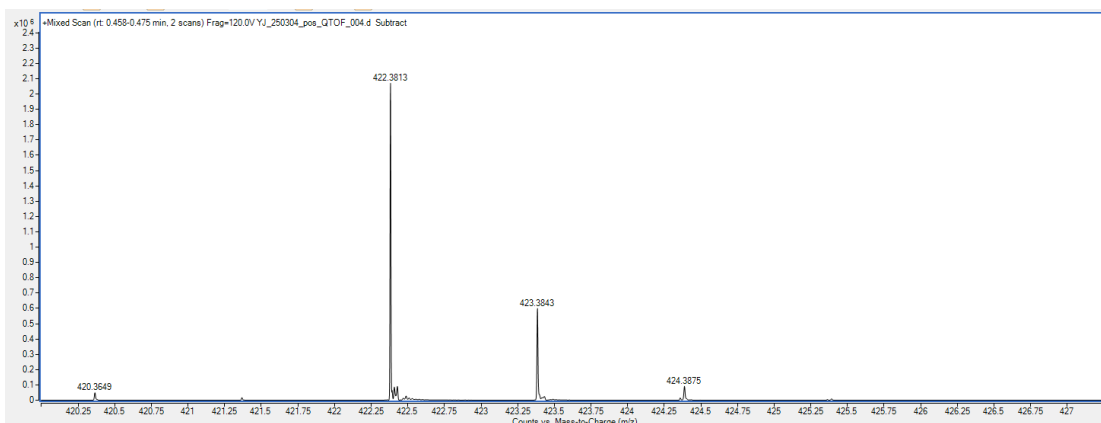

**Figure S28:** HRMS spectrum of *N*-(2,4,6-tricyclohexylphenyl)-3,3-dimethylbutan-2-imine

### Preparation of <sup>D</sup>CHP<sub>N</sub>acnacH

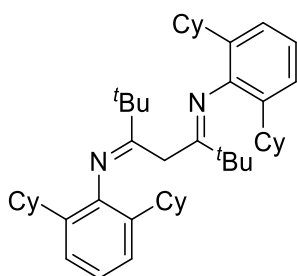

*N*-(2,6-dicyclohexylphenyl)-3,3-dimethylbutan-2-imine (7.55 g, 0.022 mol) was dissolved in hexane (~150 mL) and TMEDA (3.34 mL, 0.022 mol) was added. The solution was cooled to  $-78\text{ }^{\circ}\text{C}$  and *n*-butyllithium (1.6 M in hexanes, 13.9 mL, 0.022 mol) was then added dropwise. The resultant mixture was allowed to warm to room temperature and stirred for 16 hours to give a yellow suspension. *N*-(2,6-dicyclohexylphenyl)pivalimidoyl chloride (8.00 g, 0.022 mol) was dissolved in hexane (~100 mL) and transferred to the reaction mixture which was stirred at reflux for 5 hours. The solution was cooled to room temperature and quenched with water (~100 mL) to give a clear biphasic mixture. The organic layer was extracted with diethyl ether (3 x 100 mL) and then washed with brine (2 x 100 mL). The organic layer was then dried with  $\text{MgSO}_4$ , filtered and the volatiles removed *in vacuo*. The oily residue was dissolved in hexane and the product isolated as a solid by fractional crystallisation. **Yield:** 10.21 g, 69%.

**M.p.:** 204–208  $^{\circ}\text{C}$ .

<sup>1</sup>H NMR (400 MHz,  $\text{C}_6\text{D}_6$ ):  $\delta$  0.89 – 1.16 (m, 8H, Cy-H), 1.21 (s, 18H, C(CH<sub>3</sub>)<sub>3</sub>), 1.33 – 1.98 (m, 32H, Cy-H), 2.37 – 2.56 (m, 2H, Cy-H), 2.63 – 2.81 (m, 2H, Cy-H), 3.35 (s, 1H, CH<sub>2</sub>), 7.03 – 7.20 (m, 6H, <sup>D</sup>CHPAr-H).

$^{13}\text{C}\{^1\text{H}\}$  NMR (101 MHz,  $\text{C}_6\text{D}_6$ ):  $\delta$  26.8, 27.3, 27.6, 27.8 (Cy-C), 29.3 (C(CH $_3$ ) $_3$ ), 30.9, 31.3 (Cy-C), 32.2 (CH $_2$ ), 34.9, 35.3, 39.3, 40.4 (Cy-C), 41.8 (C(CH $_3$ ) $_3$ ), 123.5, 124.0, 134.1, 136.9, 145.2 (DCHPAr-C), 172.7 (NC).

I.R. (solid,  $\text{cm}^{-1}$ ): 3302 (br), 2914 (s), 2847 (s), 1640 (s), 1617 (m), 1502 (m), 1446 (s), 1360 (w), 1308 (w), 1259 (w), 1170 (w), 1103 (m), 1021 (m), 943 (m), 887 (w), 790 (w), 760 (s).

HRMS (ESI)  $m/z$ :  $[\text{M} + \text{H}]^+$  calc. for  $\text{C}_{47}\text{H}_{70}\text{N}_2$ : 663.5612; Found: 663.5602.

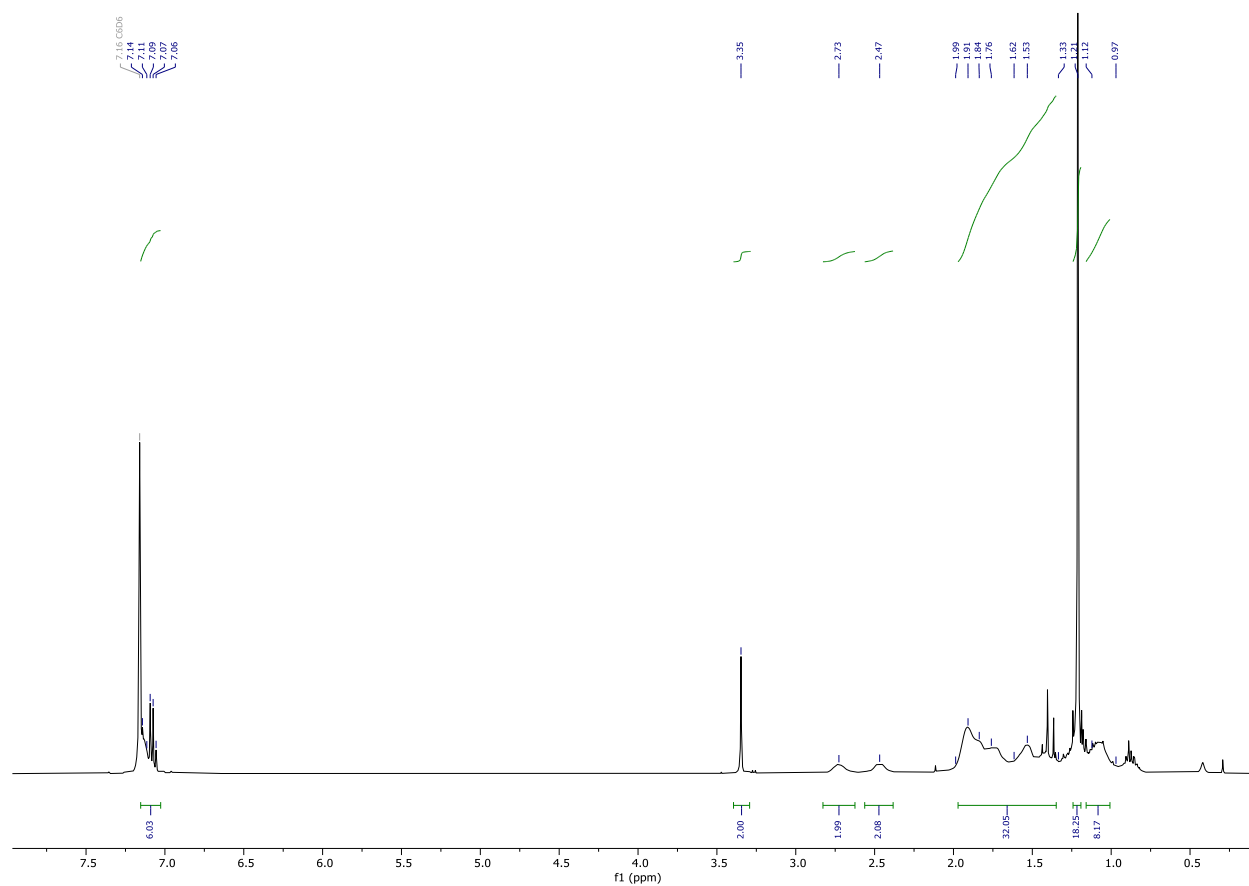

Figure S29:  $^1\text{H}$  NMR spectrum (400 MHz, 298 K,  $\text{C}_6\text{D}_6$ ) of  $\text{DCHPNacnACH}$ .

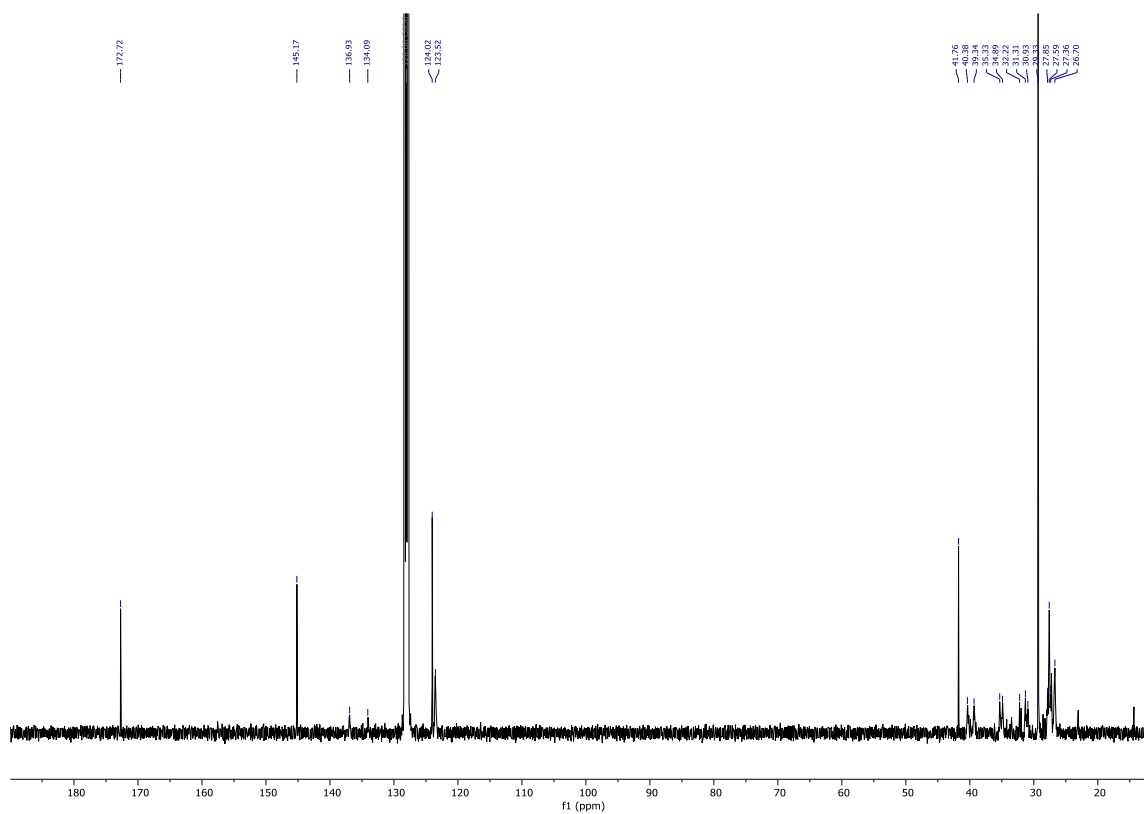

Figure S30:  $^{13}\text{C}\{^1\text{H}\}$  NMR spectrum (101 MHz, 298 K,  $\text{C}_6\text{D}_6$ ) of  $\text{DCHPNacnacH}$ .

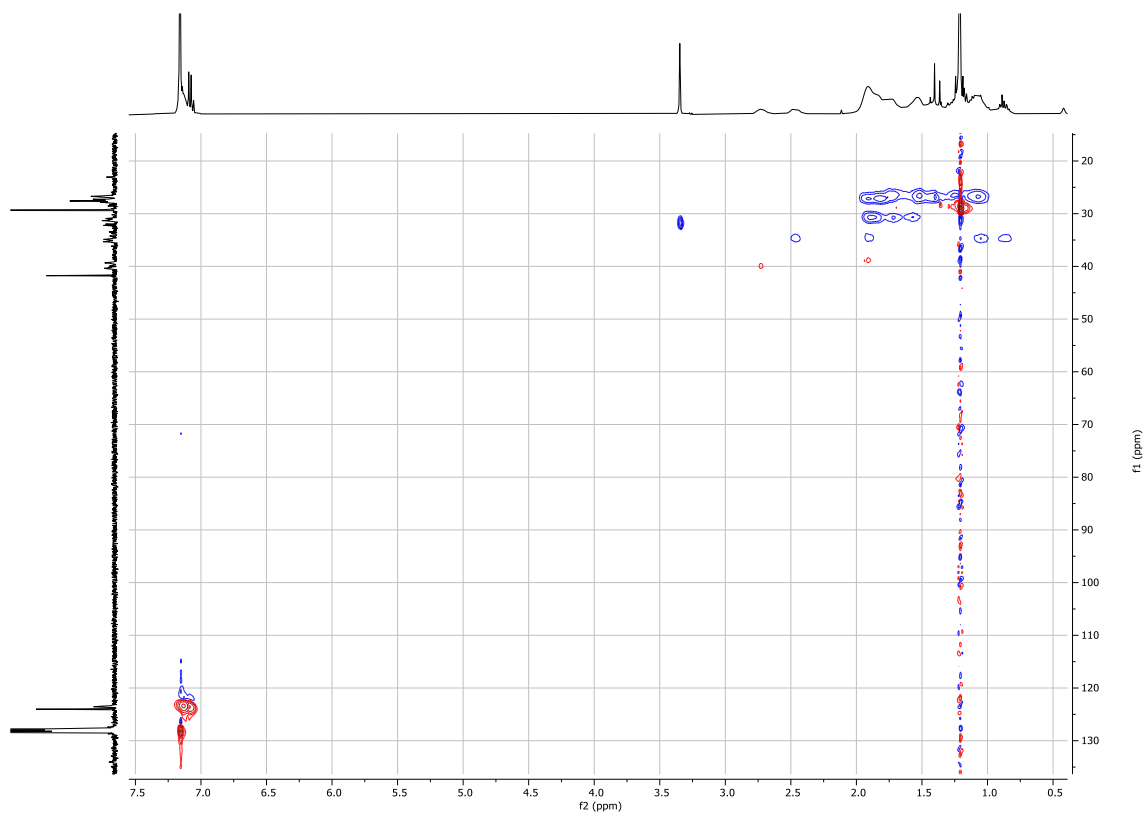

Figure S31: HSQC NMR spectrum (298 K,  $\text{C}_6\text{D}_6$ ) of  $\text{DCHPNacnacH}$ .

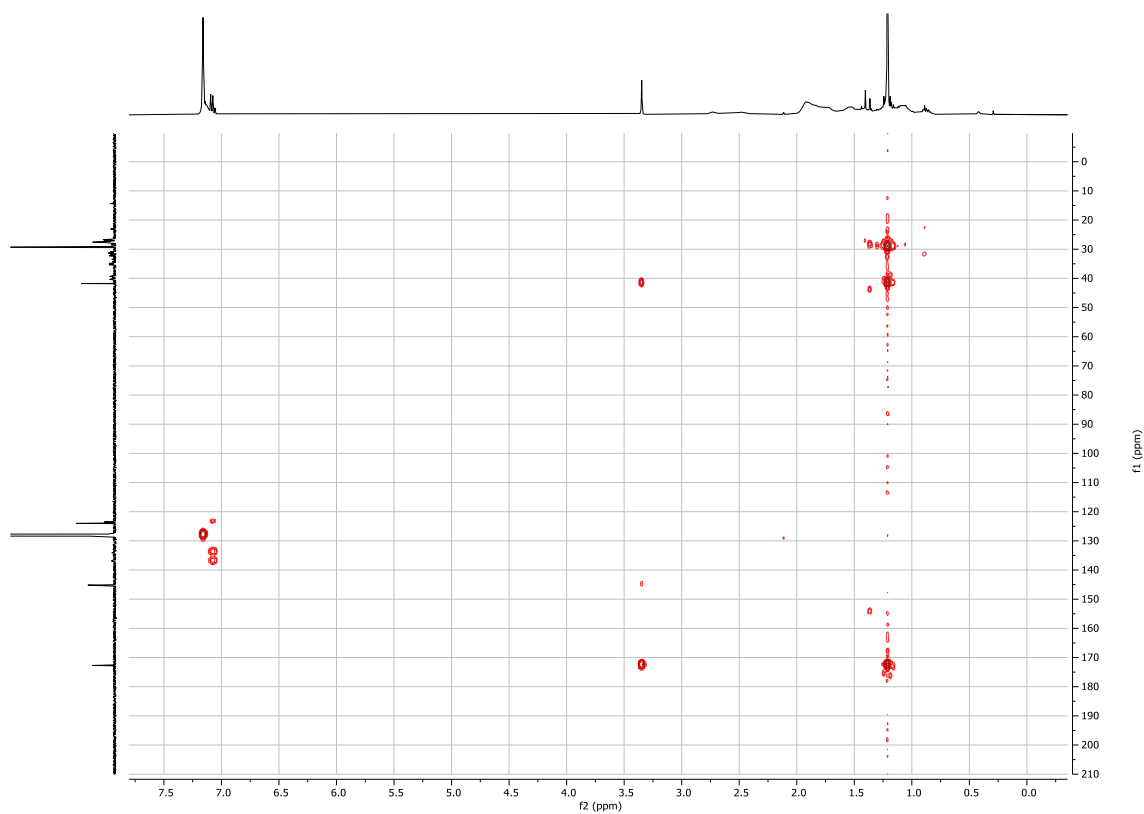

**Figure S32:** HMBC NMR spectrum (298 K, C<sub>6</sub>D<sub>6</sub>) of <sup>D</sup>CHPNacnacH.

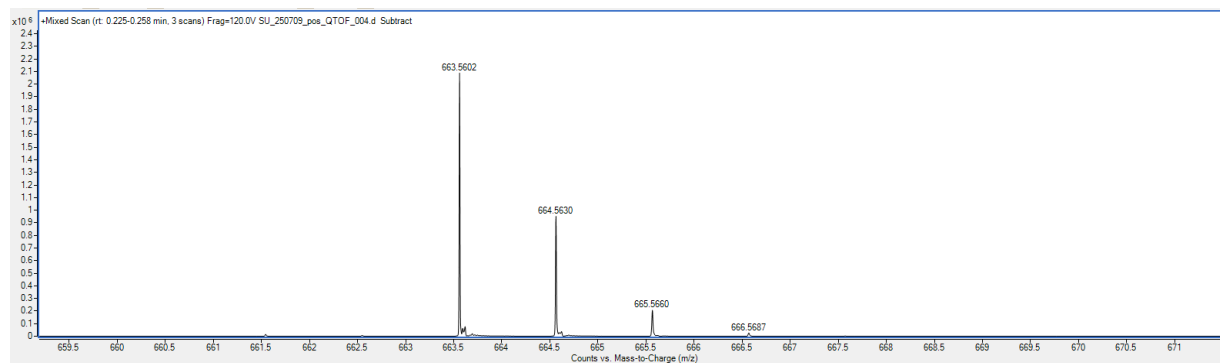

**Figure S33:** HRMS Spectrum of <sup>D</sup>CHPNacnacH.

## Preparation of <sup>TCHP</sup>NacnacH

### Bis(imine) Tautomer

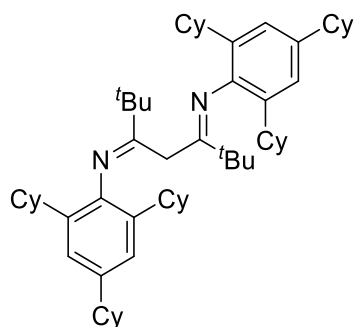

*N*-(2,4,6-tricyclohexylphenyl)-3,3-dimethylbutan-2-imine (3.00 g, 0.007 mol) was dissolved in hexane (~150 mL) and TMEDA (3.00 mL, 0.020 mol) was added. The solution was cooled to  $-78\text{ }^{\circ}\text{C}$  and *n*-butyllithium (1.6 M in hexanes, 5.00 mL, 0.008 mol) was added dropwise. The resulting mixture was allowed to warm to room temperature and stirred for 16 hours to give a yellow suspension. *N*-(2,4,6-tricyclohexylphenyl)pivalimidoyl chloride (3.15 g, 0.007 mol) was dissolved in hexane (~100 mL) and transferred to the reaction mixture was then heated at reflux for 5 hours. The solution was cooled to room temperature and quenched with water (~100 mL) to give a clear biphasic mixture. The organic layer was extracted with diethyl ether (3 x 100 mL) and then washed with brine (2 x 100 mL). The organic layer was dried with  $\text{MgSO}_4$ , filtered and the volatiles removed *in vacuo*. The oily residue was dissolved in hexane and the product isolated as a solid by fractional crystallisation. **Yield:** 5.00 g, 84%.

**M.p.:** 174–177  $^{\circ}\text{C}$ .

**<sup>1</sup>H NMR** (400 MHz,  $\text{C}_6\text{D}_6$ ):  $\delta$  1.25 (s, 18H,  $\text{C}(\underline{\text{CH}_3})_3$ ), 1.38 – 1.42 (m, 16H,  $\text{Cy}-\underline{\text{H}}$ ), 1.43 – 1.61 (m, 12H,  $\text{Cy}-\underline{\text{H}}$ ), 1.64 – 2.09 (m, 32H,  $\text{Cy}-\underline{\text{H}}$ ), 2.45 – 2.60 (m, 4H,  $\text{Cy}-\underline{\text{H}}$ ), 2.69 – 2.87 (m, 2H,  $\text{Cy}-\underline{\text{H}}$ ), 3.38 (s, 2H,  $\underline{\text{CH}_2}$ ), 7.05 – 7.15 (m, 4H,  $\text{TCHPAr}-\underline{\text{H}}$ ).

**<sup>13</sup>C{<sup>1</sup>H} NMR** (101 MHz,  $\text{C}_6\text{D}_6$ ):  $\delta$  26.7, 26.8, 27.0, 27.3, 27.5, 27.7, 27.8, 27.9 ( $\text{Cy}-\underline{\text{C}}$ ), 29.4 ( $\text{C}(\underline{\text{CH}_3})_3$ ), 31.2, 31.6 ( $\text{Cy}-\underline{\text{C}}$ ), 32.4 ( $\underline{\text{CH}_2}$ ), 34.4, 35.0, 35.2, 35.4, 35.6, 39.5, 40.5 ( $\text{Cy}-\underline{\text{C}}$ ), 41.8 ( $\underline{\text{C}}(\text{CH}_3)_3$ ), 45.0 ( $\text{Cy}-\underline{\text{C}}$ ), 121.6, 121.9, 133.9, 136.7, 143.1, 143.4 ( $\text{TCHPAr}-\underline{\text{C}}$ ), 173.1 ( $\underline{\text{N}}\underline{\text{C}}$ ).

**I.R.** (solid,  $\text{cm}^{-1}$ ): 2918 (s), 2845 (s), 1643 (w), 1614 (s), 1439 (s), 1358 (w), 1293 (w), 1235 (w), 1175 (w), 1107 (m), 1000 (w), 952 (w), 862 (m), 625 (w).

**HRMS (ESI) m/z:**  $[\text{M} + \text{H}]^+$  calc. for  $\text{C}_{59}\text{H}_{90}\text{N}_2$ : 827.7177; found: 827.7162.

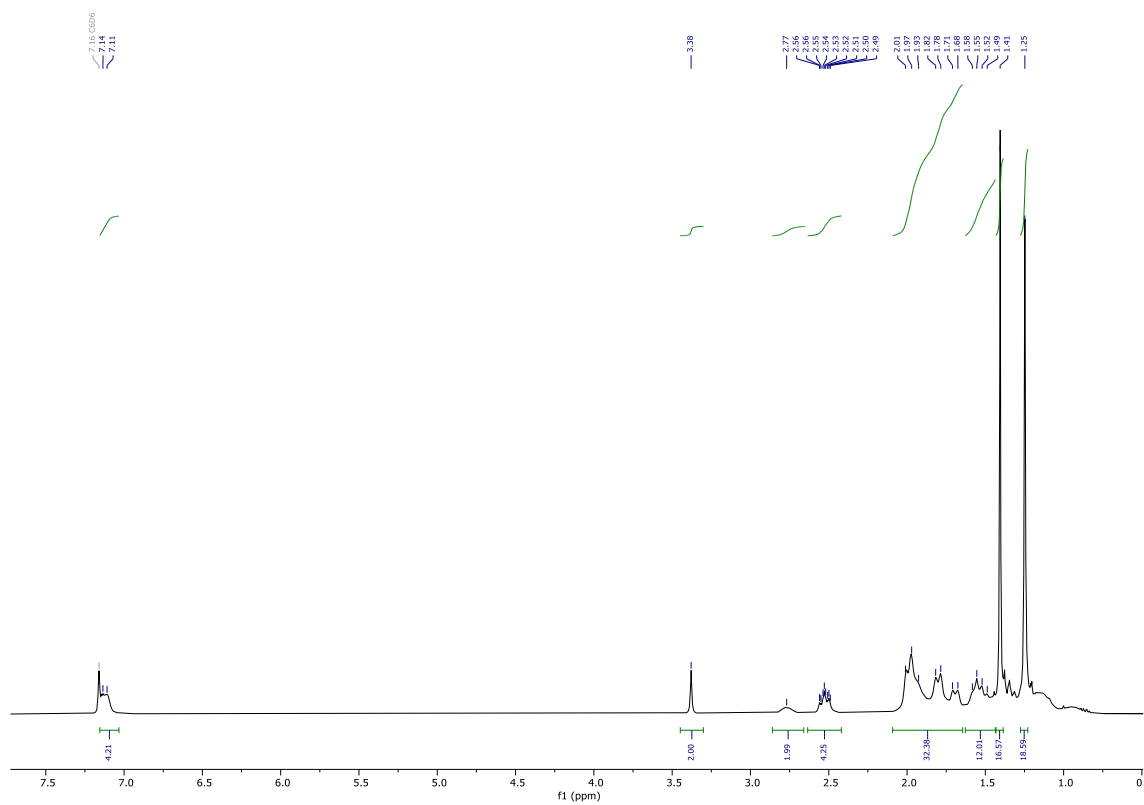

**Figure S34:**  $^1\text{H}$  NMR spectrum (400 MHz, 298 K,  $\text{C}_6\text{D}_6$ ) of  $^{\text{TCHP}}\text{NacnacH}$  (bis(imine) tautomer).

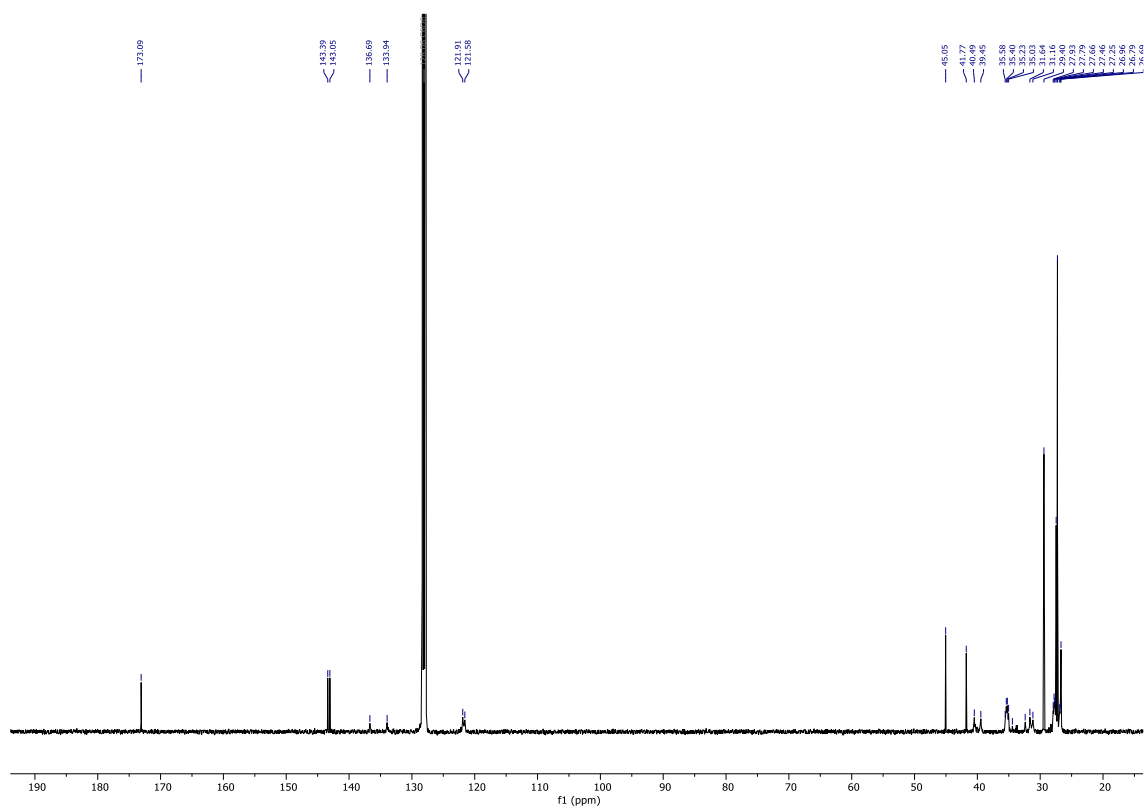

**Figure S35:**  $^{13}\text{C}\{^1\text{H}\}$  NMR spectrum (101 MHz, 298 K,  $\text{C}_6\text{D}_6$ ) of  $^{\text{TCHP}}\text{NacnacH}$  (bis(imine) tautomer).

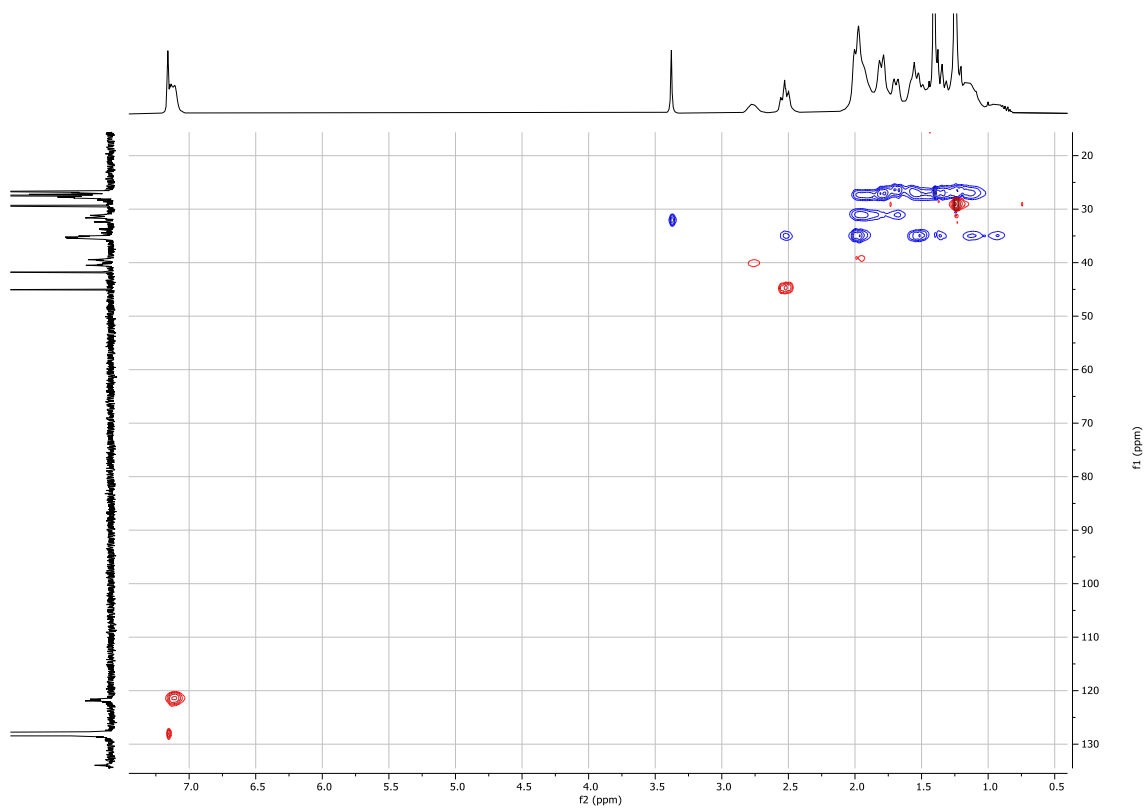

Figure S36: HSQC NMR spectrum (298 K, C<sub>6</sub>D<sub>6</sub>) of <sup>13</sup>CHPNacnacH (bis(imine) tautomer).

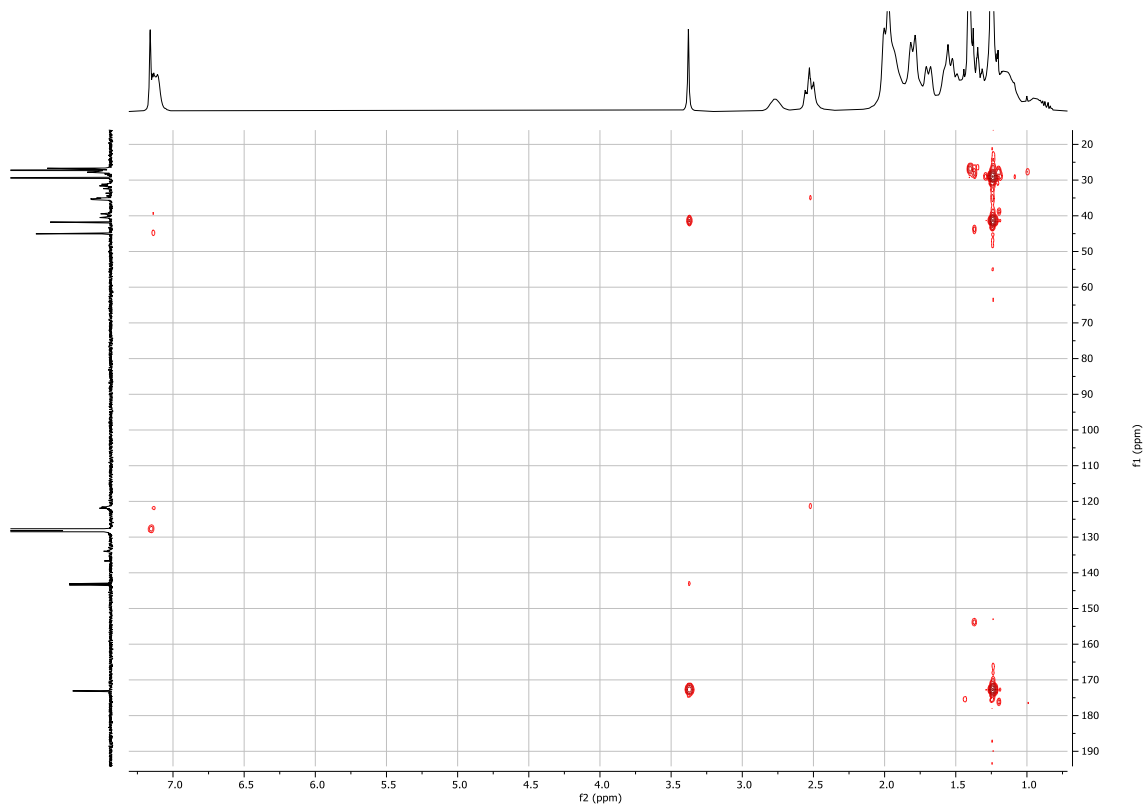

Figure S37: HMBC NMR spectrum (298 K, C<sub>6</sub>D<sub>6</sub>) of <sup>13</sup>CHPNacnacH (bis(imine) tautomer).

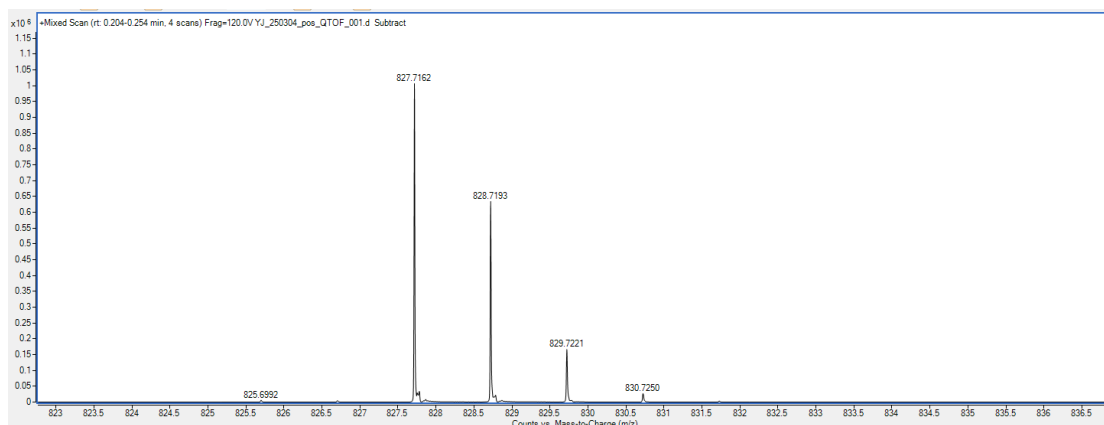

**Figure S38:** HRMS spectrum of  $\text{TCHP}^{\text{NacnacH}}$  (bis(imine) tautomer).

### Enamine Tautomer

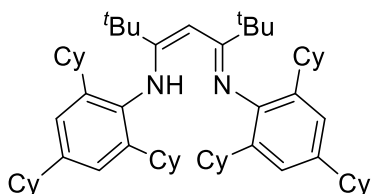

A diethyl ether solution (~20 mL) of [ $\text{TCHP}^{\text{Nacnac}}\text{Li}(\text{OEt}_2)$ ] (see below, 1.00 g, 1.10 mol) was carefully quenched by the dropwise addition of cold water (~10 mL). The aqueous layer was discarded and the organic layer washed with water (2 x 10 mL) and brine (1 x 10 mL), dried with  $\text{MgSO}_4$ , filtered, and the volatiles removed *in vacuo* to afford a yellow oil. Bright yellow crystals were obtained from a hexane solution of the crude product. **Yield:** 850 mg, 93%.

**M.p.:** 174–177 °C.

$^1\text{H NMR}$  (400 MHz,  $\text{C}_6\text{D}_6$ ):  $\delta$  1.21 (s, 18H,  $\text{C}(\underline{\text{C}}\text{H}_3)_3$ ), 1.25 – 1.55 (m, 22H,  $\text{Cy}-\underline{\text{H}}$ ), 1.63 – 1.82 (m, 18H,  $\text{Cy}-\underline{\text{H}}$ ), 1.85 – 2.12 (m, 20H,  $\text{Cy}-\underline{\text{H}}$ ), 2.39 – 2.52 (m, 2H,  $\text{Cy}-\underline{\text{H}}$ ), 2.95 – 3.08 (m, 4H,  $\text{Cy}-\underline{\text{H}}$ ), 5.64 (s, 1H,  $\text{NCC}\underline{\text{H}}$ ), 7.06 (s, 4H,  $\text{TCHPAr}-\underline{\text{H}}$ ), 12.01 (s, 1H,  $\text{NH}$ ).

$^{13}\text{C}\{^1\text{H}\}$  NMR (101 MHz,  $\text{C}_6\text{D}_6$ ):  $\delta$  26.7, 26.9, 27.2, 27.5, 27.6 ( $\text{Cy}-\underline{\text{C}}$ ), 31.4 ( $\text{C}(\underline{\text{C}}\text{H}_3)_3$ ), 33.0, 35.2, 35.8, 39.3 ( $\text{Cy}-\underline{\text{C}}$ ), 41.6 ( $\underline{\text{C}}(\text{CH}_3)_3$ ), 45.0 ( $\text{Cy}-\underline{\text{C}}$ ), 96.0 ( $\text{NCC}\underline{\text{H}}$ ), 122.1, 139.0, 141.2, 143.0 ( $\text{TCHPAr}-\underline{\text{C}}$ ), 170.4 ( $\text{NC}$ ).

**I.R.** (solid,  $\text{cm}^{-1}$ ): 2918 (s), 2847 (s), 1612 (m), 1547 (s), 1447 (s), 1391 (w), 1354 (w), 1291 (w), 1264 (m), 1208 (w), 1104 (s), 1020 (m), 989 (w), 947 (w), 856 (s), 781 (w), 725 (w), 677 (m).

**HRMS (ESI) m/z:**  $[\text{M} + \text{H}]^+$  calc. for  $\text{C}_{59}\text{H}_{90}\text{N}_2$ : 827.7177; 827.7169.



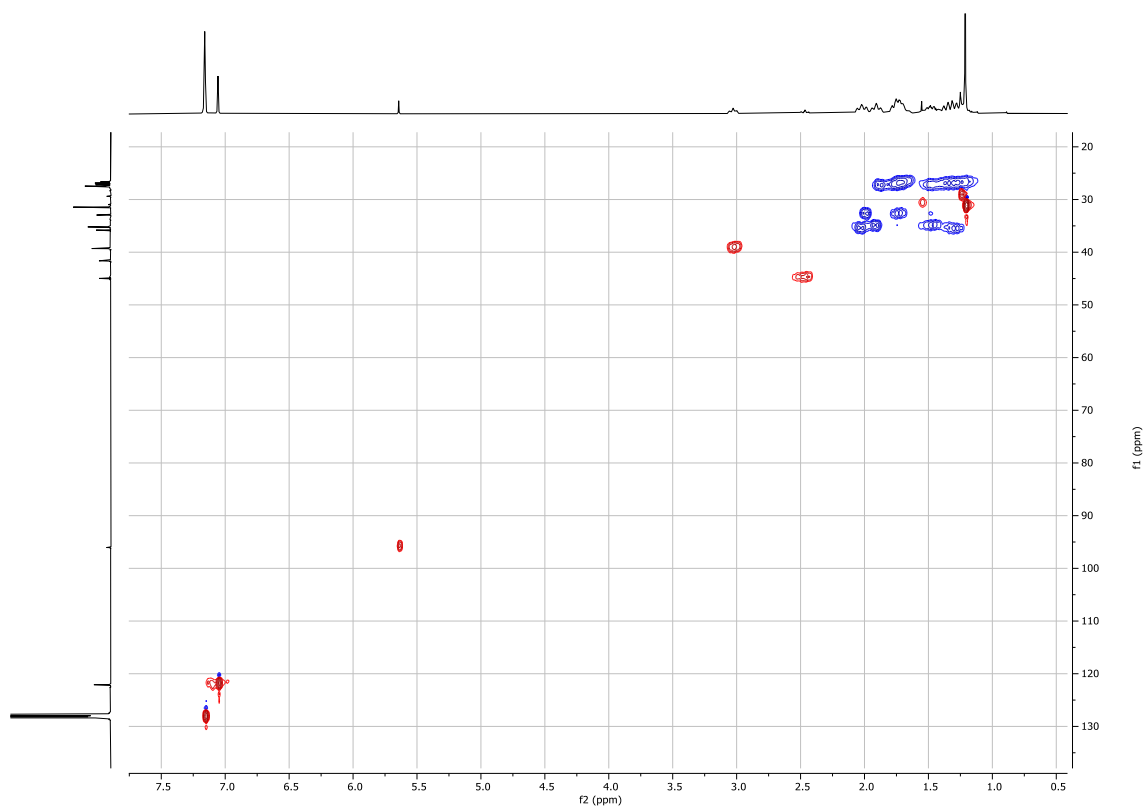

Figure S41: HSQC NMR spectrum (298 K, C<sub>6</sub>D<sub>6</sub>) of <sup>13</sup>C<sup>H</sup>P<sup>N</sup>acnacH (enamine tautomer).

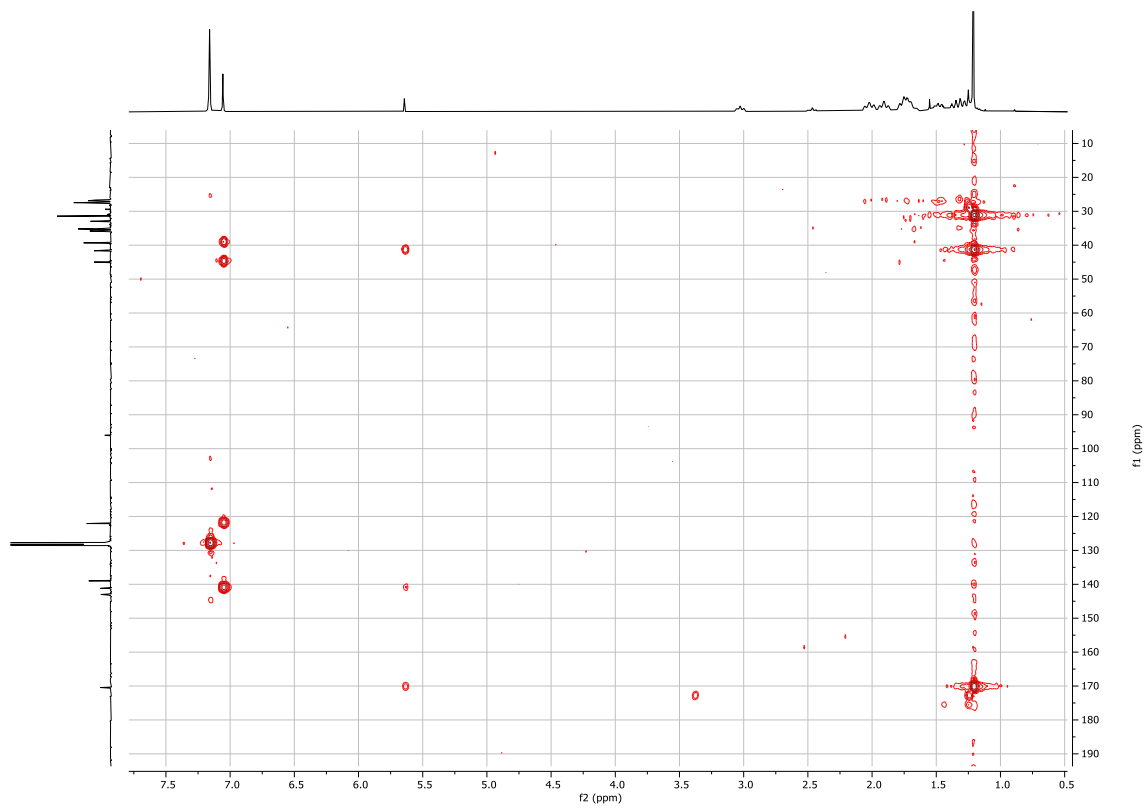

Figure S42: HMBC NMR spectrum (298 K, C<sub>6</sub>D<sub>6</sub>) of <sup>13</sup>C<sup>H</sup>P<sup>N</sup>acnacH (enamine tautomer).

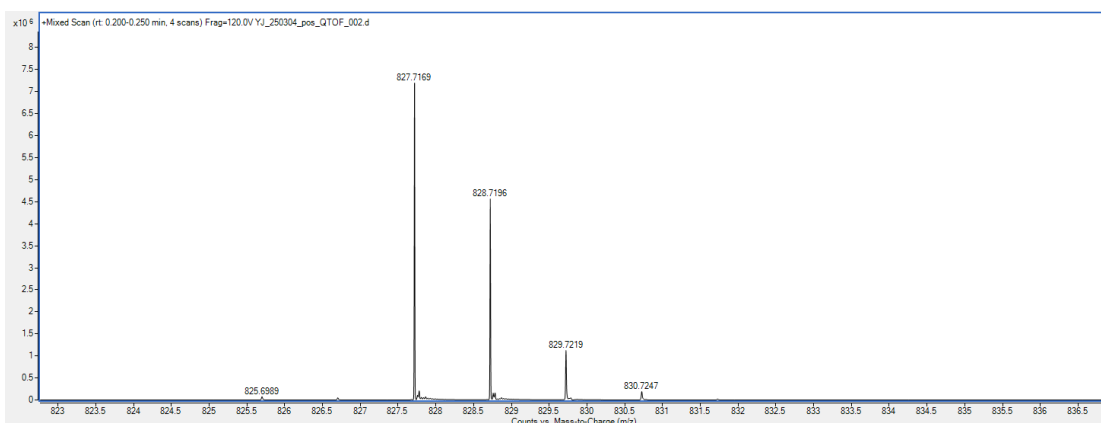

**Figure S43:** HRMS spectrum of <sup>TCHP</sup>NacnacH (enamine tautomer).

### Preparation of <sup>TCHP/Dip</sup>NacnacH.

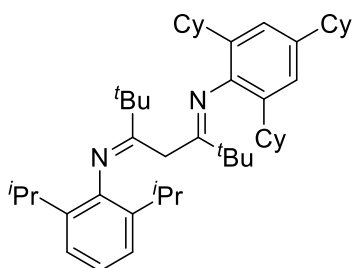

*N*-(2,6-diisopropylphenyl)-3,3-dimethylbutan-2-imine (13.00 g, 0.050 mol) was dissolved in diethyl ether (~150 mL) and TMEDA (10.28 mL, 0.069 mol) was added. The solution was cooled to  $-78\text{ }^{\circ}\text{C}$  and *n*-butyllithium (2 M in hexanes, 24.66 mL, 0.049 mol) was added dropwise. The resultant mixture was allowed to warm to room temperature and stirred for 16 hours to give a yellow suspension. *N*-(2,4,6-tricyclohexylphenyl)pivalimidoyl chloride (21.50 g, 0.049 mol) was dissolved in diethyl ether (~100 mL) and transferred to the reaction mixture, then heated at reflux for 5 hours. The solution was then cooled to room temperature and quenched with water (~100 mL) to give a clear biphasic mixture. The organic layer was extracted with diethyl ether (3 x 100 mL) and then washed with brine (2 x 100 mL). The organic layer was dried with  $\text{MgSO}_4$ , filtered and the volatiles removed *in vacuo*. The oily residue was dissolved in hexane and the product isolated as a solid by fractional crystallisation. **Yield:** 27.20 g, 84%.

**M.p.:** 208–210  $^{\circ}\text{C}$ .

<sup>1</sup>H NMR (400 MHz,  $\text{C}_6\text{D}_6$ ):  $\delta$  1.18 (s, 9H, C(CH<sub>3</sub>)<sub>3</sub>), 1.23 (s, 9H, C(CH<sub>3</sub>)<sub>3</sub>), 1.26 – 1.38 (m, 12H, CH(CH<sub>3</sub>)<sub>2</sub>), 1.42 – 2.04 (m, 30H, Cy-H), 2.24 – 2.41 (m, 1H, CH(CH<sub>3</sub>)<sub>2</sub>), 2.50 (tt, J = 11.9, 3.4 Hz, 2H,

Cy-H), 2.64 – 2.81 (m, 1H, Cy-H), 3.04 – 3.21 (m, 1H, CH(CH<sub>3</sub>)<sub>2</sub>), 3.29 – 3.46 (m, 2H, CH<sub>2</sub>), 7.06 (t, J = 7.6 Hz, 1H, DippAr-H), 7.09 – 7.15 (m, 4H, TCHPAr-H, DippAr-H).

<sup>13</sup>C{<sup>1</sup>H} NMR (101 MHz, C<sub>6</sub>D<sub>6</sub>): δ 20.8, 24.1, 24.6 (CH(CH<sub>3</sub>)<sub>2</sub>), 26.7, 26.8, 27.4, 27.7, 27.8 (Cy-C), 29.0, 29.4 (C(CH<sub>3</sub>)<sub>3</sub>), 31.7 (Cy-C), 32.3 (CH<sub>2</sub>), 34.4, 35.3, 35.3, 39.3, 40.3 (Cy-C), 41.9 (C(CH<sub>3</sub>)<sub>3</sub>), 45.0 (Cy-C), 121.9, 122.6, 122.9, 123.3, 124.0, 143.1, 143.2, 145.2 (TCHPAr-C, DippAr-C), 172.8, 173.0 (NC).

**I.R.** (solid, cm<sup>-1</sup>): 3302 (w), 3058 (m), 2960 (s), 2920 (s), 2846 (s), 1638 (s), 1612 (s), 1498 (w), 1446 (s), 1381 (w), 1362 (m), 1325 (w), 1295 (w), 1256 (w), 1241 (w), 1217 (w), 1180 (w), 1109 (m), 1044 (w), 1025 (w), 952 (w), 934 (w), 893 (w), 859 (m), 842 (w), 814 (w), 796 (w), 760 (s), 708 (w).

**HRMS (ESI) m/z:** [M + H]<sup>+</sup> calc. for C<sub>47</sub>H<sub>73</sub>N<sub>2</sub>: 665.5769; Found: 665.5768.

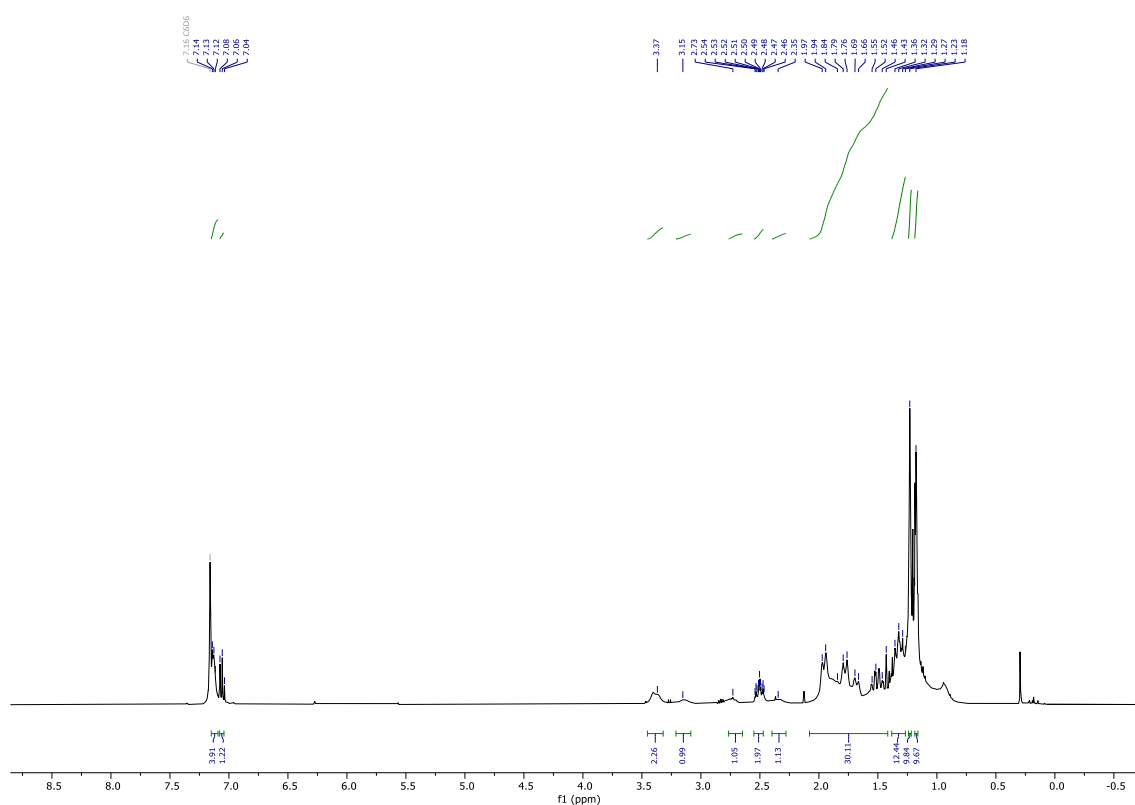

**Figure S44:** <sup>1</sup>H NMR spectrum (400 MHz, 298 K, C<sub>6</sub>D<sub>6</sub>) of <sup>TCHP/Dip</sup>NacnacH.

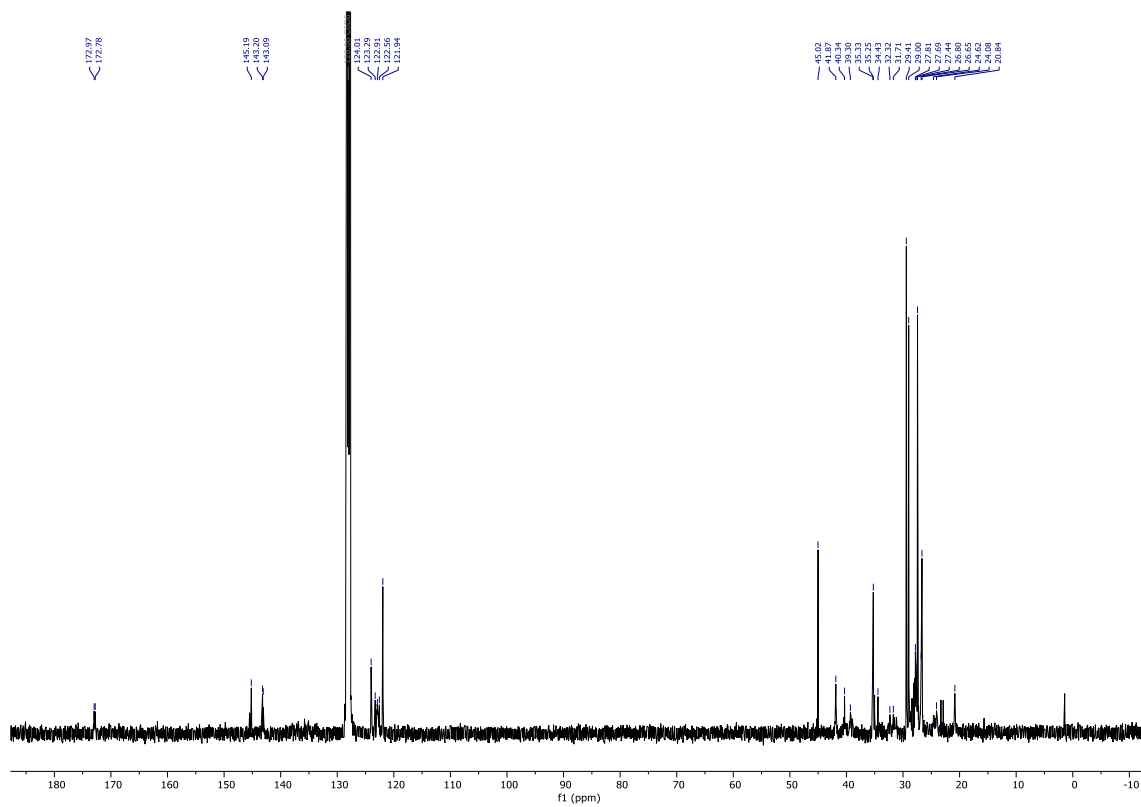

Figure S45:  $^{13}\text{C}\{^1\text{H}\}$  NMR spectrum (101 MHz, 298 K,  $\text{C}_6\text{D}_6$ ) of  $^{\text{TCHP/DipNacnacH}}$ .

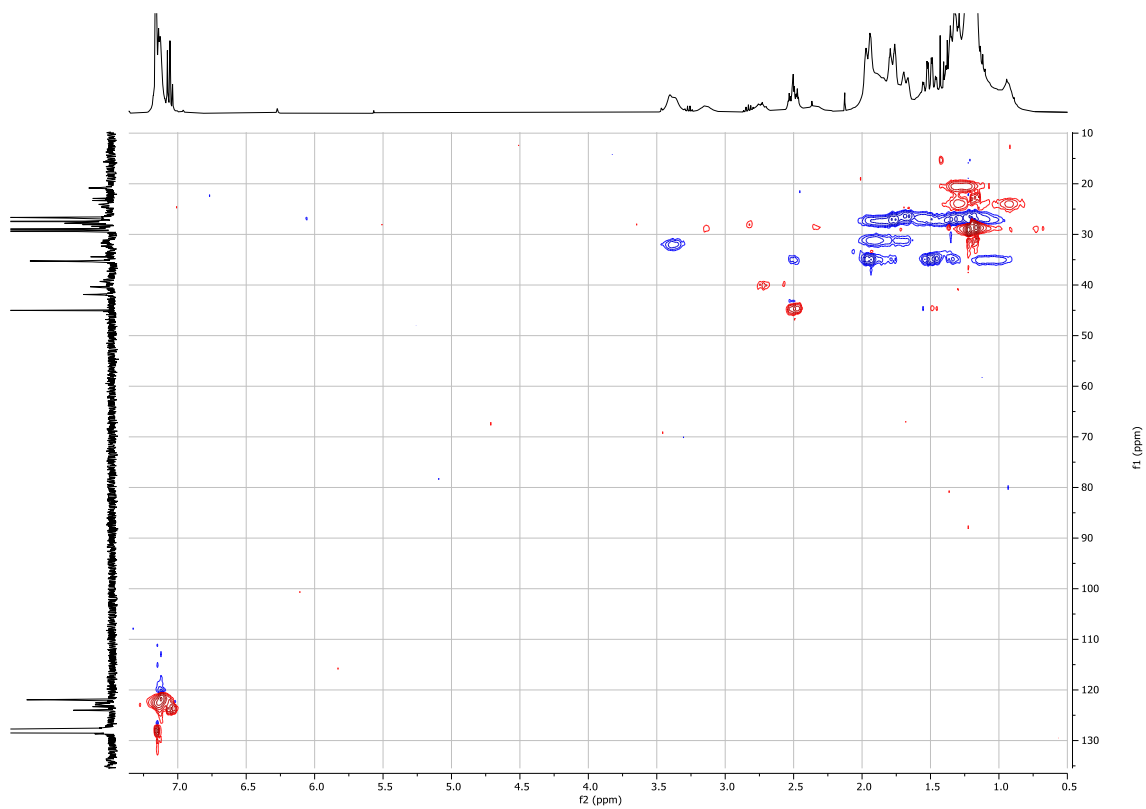

Figure S46: HSQC NMR spectrum (298 K,  $\text{C}_6\text{D}_6$ ) of  $^{\text{TCHP/DipNacnacH}}$ .

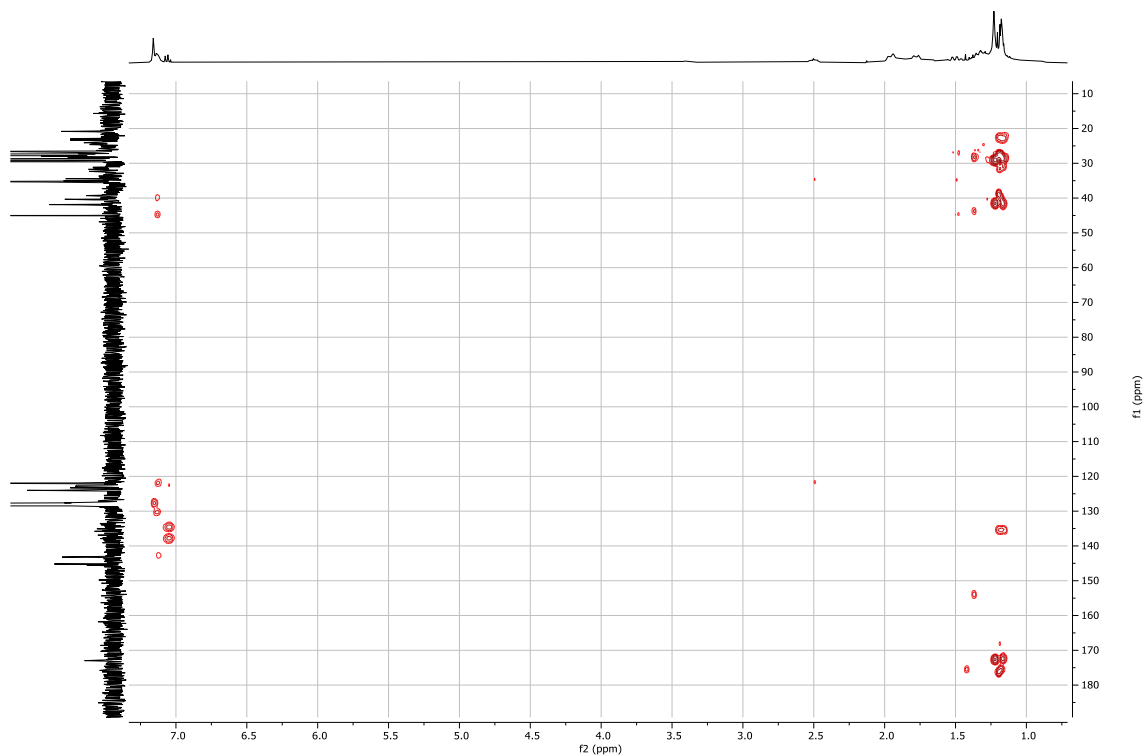

**Figure S47:** HMBC NMR spectrum (298 K, C<sub>6</sub>D<sub>6</sub>) of <sup>TCHP/DipNacnacH</sup>.

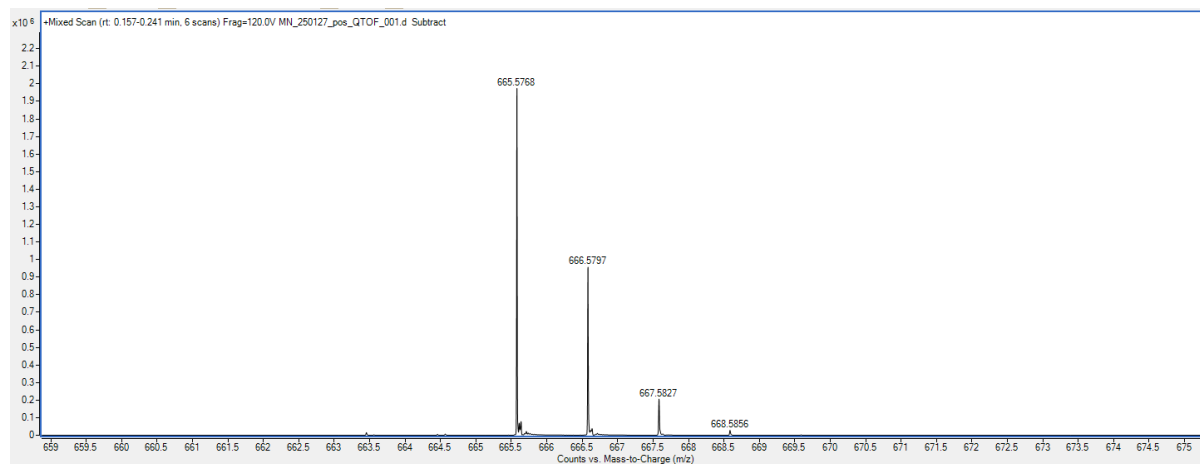

**Figure S48:** HRMS spectrum of <sup>TCHP/DipNacnacH</sup>.

### Preparation of [ $^{DCHP}$ Nacnac]Li(OEt<sub>2</sub>)

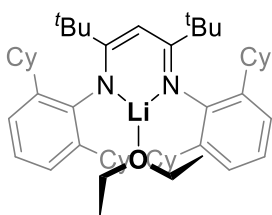

$^{DCHP}$ NacnacH (500 mg, 0.75 mmol) was charged to a flame-dried ampule and toluene (~5 mL) was added. To this stirred suspension was added methyl lithium/lithium bromide (1.5 M in Et<sub>2</sub>O, 0.98 mmol, 0.65 mL) at room temperature. The mixture was allowed to stir at room temperature for 1 hour and then sealed and stirred at 120 °C for 16 hours. The formed yellow solution was filtered via cannula and the volatiles removed *in vacuo*. The oily residue was suspended in hexane (~5 mL) to give an off-white solid, which was collected by filtration and washed with hexane (3 x 3 mL). The supernatant was reduced in volume under vacuum to provide a second yield of pale-yellow crystals. **Yield:** 374 mg, 66 %.

**M.p.:** 222–226 °C (dec).

**<sup>1</sup>H NMR** (400 MHz, C<sub>6</sub>D<sub>6</sub>): δ 0.42 (t, J = 7.0 Hz, 6H, Et<sub>2</sub>O), 1.13 – 1.35 (m, 3H, Cy-H), 1.37 (s, 18H, C(CH<sub>3</sub>)<sub>3</sub>), 1.45 – 1.65 (m, 12H, Cy-H), 1.71 – 1.96 (m, 20H, Cy-H), 2.04 – 2.13 (m, 5H, Cy-H), 2.44 (q, J = 7.0 Hz, 4H, Et<sub>2</sub>O), 2.98 – 3.10 (m, 4H, Cy-H), 5.38 (s, 1H, NCCH), 6.92 – 6.98 (m, 2H, DCHPAr-H), 7.03 (d, J = 7.6 Hz, 4H, DCHPAr-H).

**<sup>13</sup>C{<sup>1</sup>H} NMR** (101 MHz, C<sub>6</sub>D<sub>6</sub>): δ 13.5 (Et<sub>2</sub>O), 27.0, 27.7, 27.9 (Cy-C), 33.4 (C(CH<sub>3</sub>)<sub>3</sub>), 33.8, 34.7, 38.9 (Cy-C), 44.7 (C(CH<sub>3</sub>)<sub>3</sub>), 64.0 (Et<sub>2</sub>O), 93.1 (NCCH), 121.1, 124.2, 138.2, 151.9 (DCHPAr-C), 172.1 (NC).

**<sup>7</sup>Li NMR** (156 MHz, C<sub>6</sub>D<sub>6</sub>): δ 1.18 (LiOEt<sub>2</sub>).

**I.R.** (solid, cm<sup>-1</sup>): 2918 (s), 2851 (s), 1621 (w), 1457 (s), 1375 (s), 1344 (w), 1310 (w), 1209 (w), 1138 (w), 1105 (w), 846 (w), 723 (w).

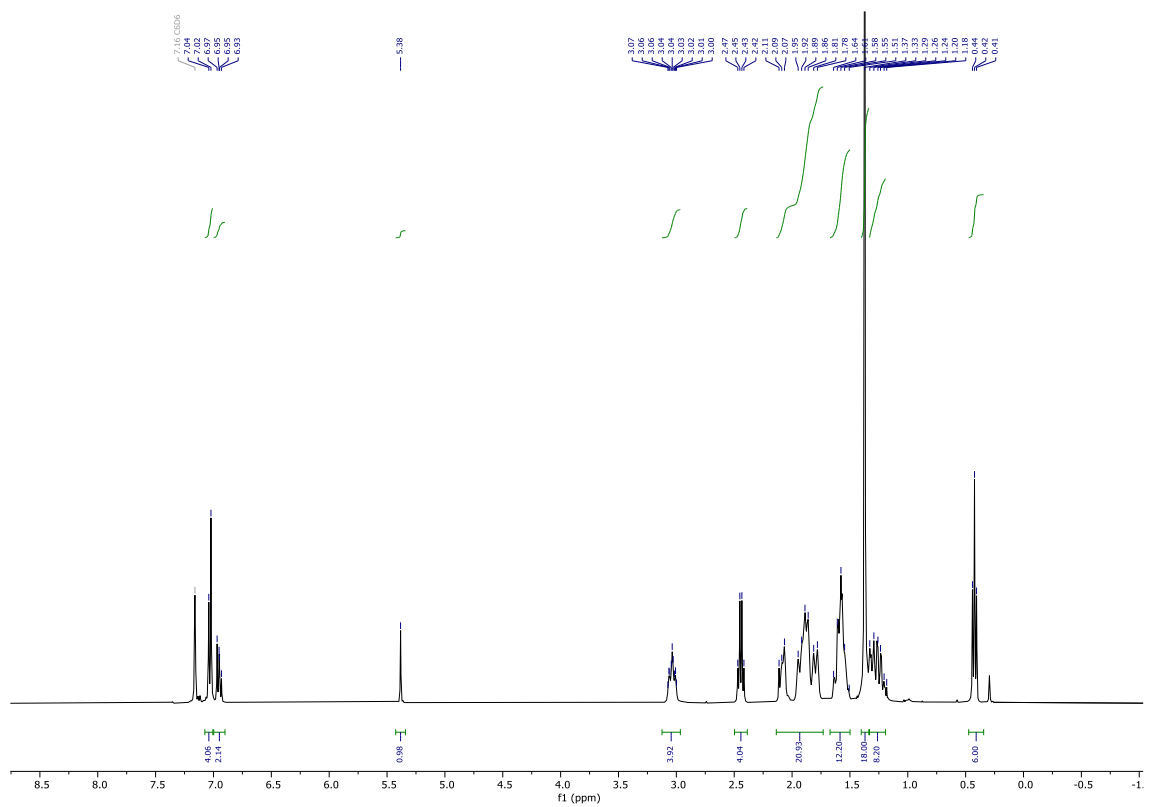

Figure S49:  $^1\text{H}$  NMR spectrum (400 MHz, 298 K,  $\text{C}_6\text{D}_6$ ) of  $[(^{\text{DCHPNacnac}}\text{Li}(\text{OEt}_2)]$ .

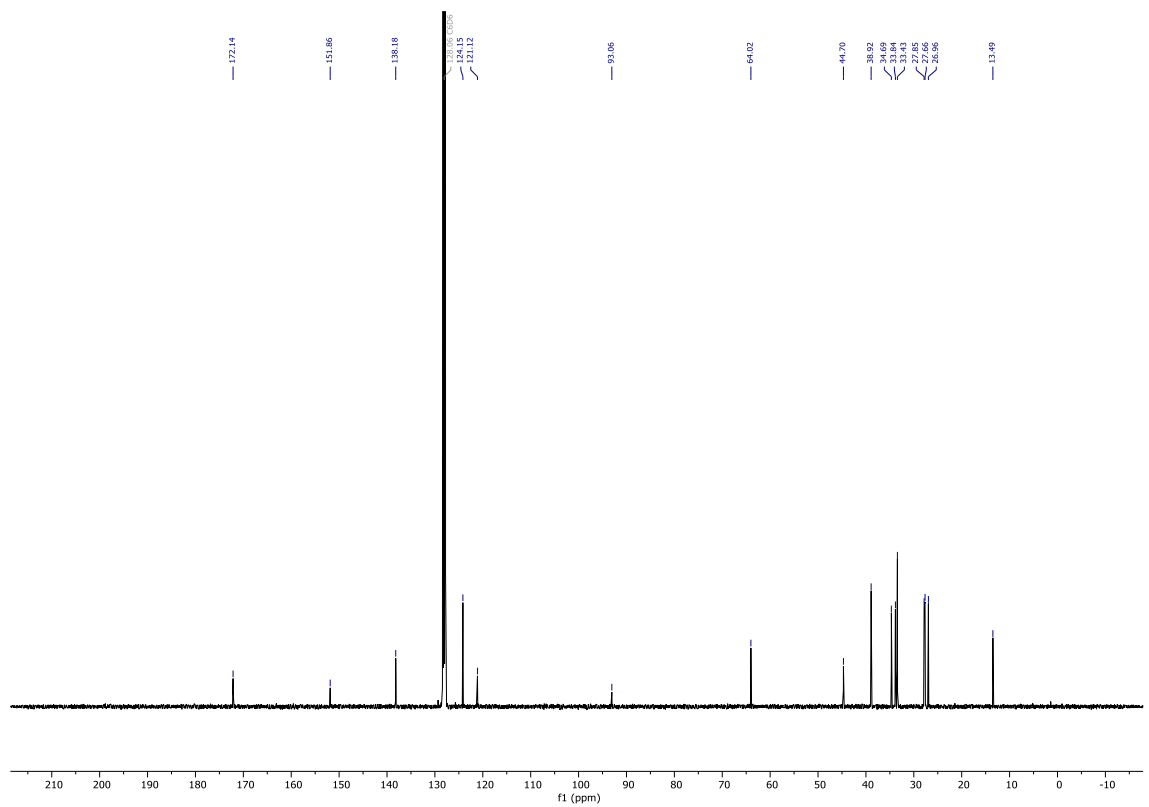

Figure S50:  $^{13}\text{C}\{^1\text{H}\}$  NMR spectrum (101 MHz, 298 K,  $\text{C}_6\text{D}_6$ ) of  $[(^{\text{DCHPNacnac}}\text{Li}(\text{OEt}_2)]$ .

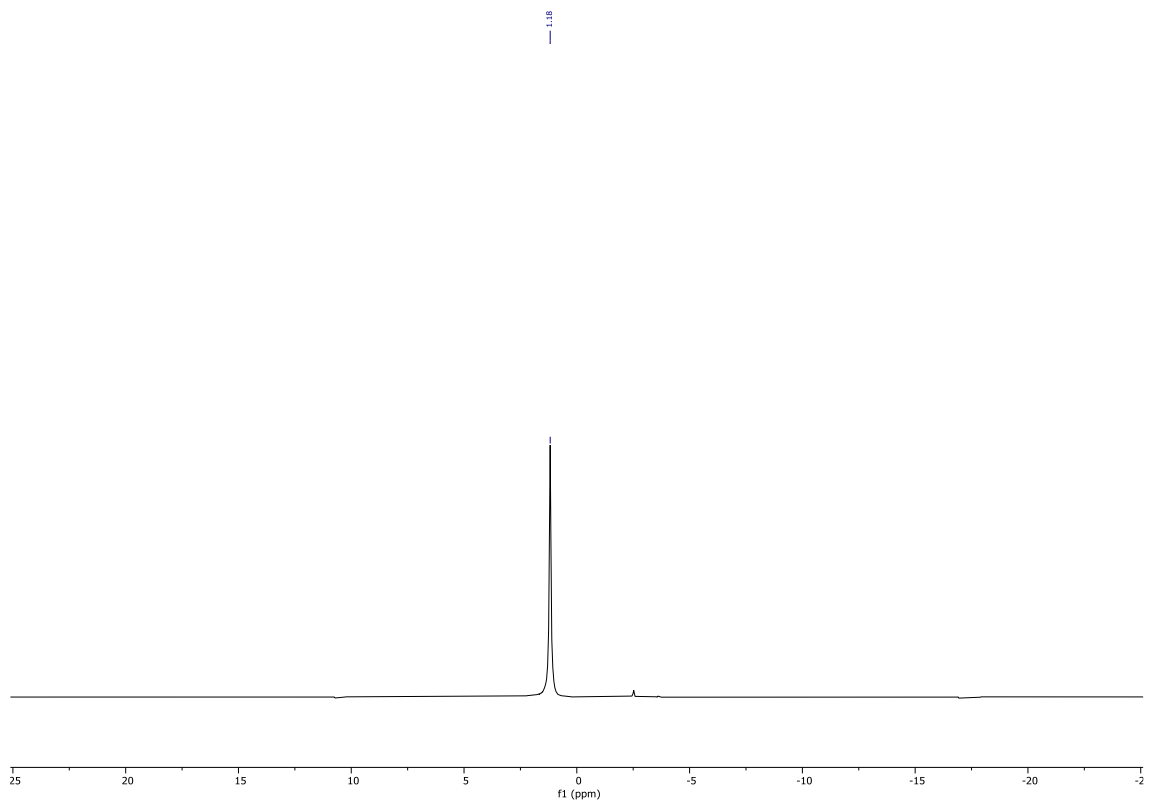

**Figure S51:**  $^7\text{Li}$  NMR spectrum (101 MHz, 298 K,  $\text{C}_6\text{D}_6$ ) of  $[(^{\text{D}}\text{CHPNacnac})\text{Li}(\text{OEt}_2)]$ .

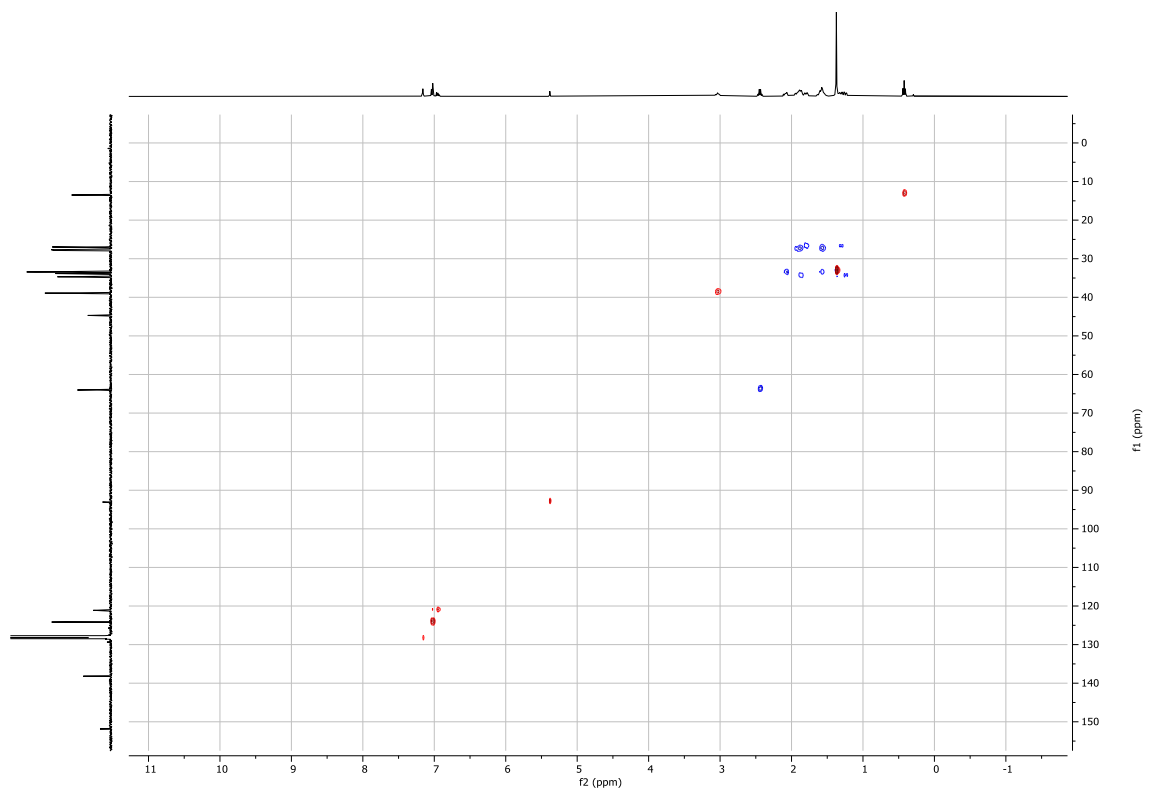

**Figure S52:** HSQC NMR spectrum (298 K,  $\text{C}_6\text{D}_6$ ) of  $[(^{\text{D}}\text{CHPNacnac})\text{Li}(\text{OEt}_2)]$ .

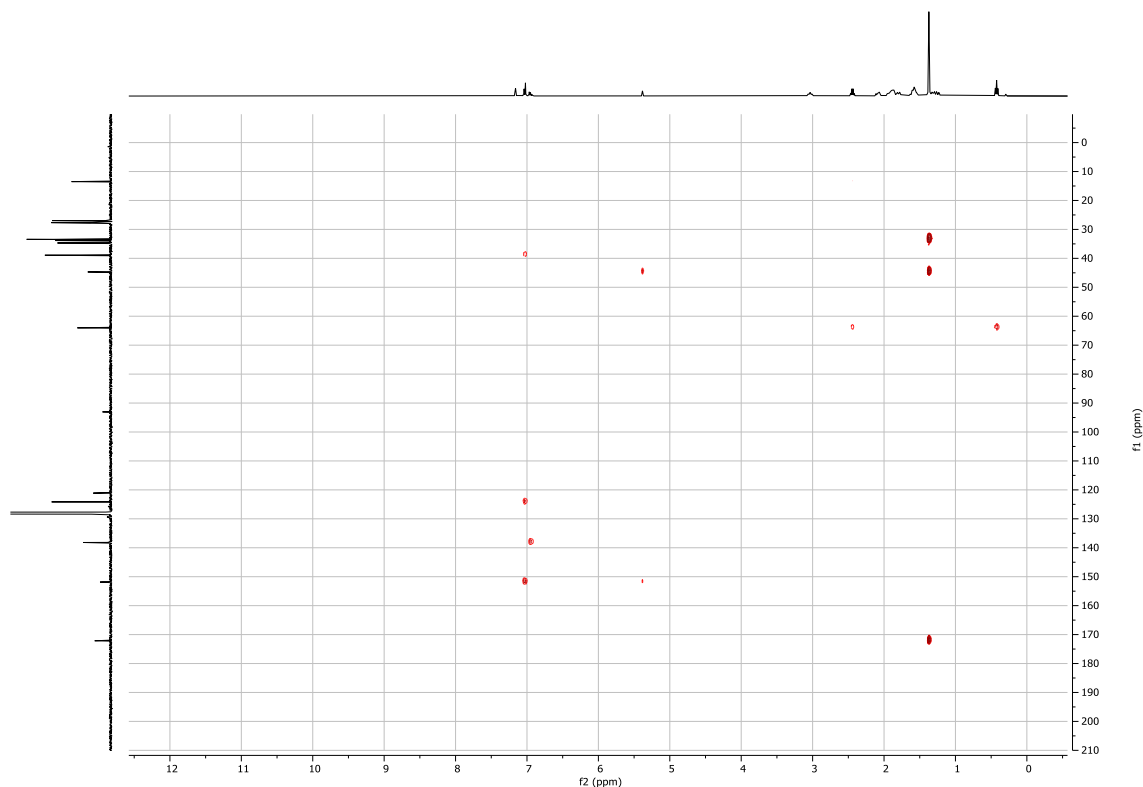

**Figure S53:** HMBC NMR spectrum (298 K,  $C_6D_6$ ) of  $[(^{13}C^{HP}Nacnac)Li(OEt_2)]$ .

### Preparation of $[(^{13}C^{HP}Nacnac)MgI]$ **1**

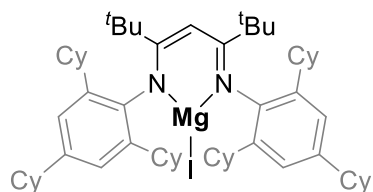

#### Method A:

$^{13}C^{HP}NacnacH$  (4.00 g, 4.83 mmol) was charged to a flame-dried ampule and toluene (~10 mL) was added. To this stirred suspension was added methyl magnesium iodide (3M in  $Et_2O$ , 5.30 mmol, 1.76 mL) at room temperature. The mixture was stirred at room temperature for 1 hour and then sealed and stirred at 120 °C for 3 days. The formed yellow-orange solution was filtered *via* cannula and the volatiles removed *in vacuo*. The oily residue was suspended in hexane (~10 mL) and stored at -30 °C to give an off-white solid which was collected by filtration and washed with hexane (3 x 5 mL). The supernatant was reduced in volume under vacuum to provide a second yield of pale-yellow crystals. **Yield:** 3.80 g, 80%.

*Method B:*

$[(^{13}\text{C}^{\text{HP}}\text{Nacnac})\text{Li}(\text{OEt}_2)]$  **2** (see below) (1.00 g, 1.10 mmol) and  $\text{MgI}_2(\text{OEt}_2)_2$  (470 mg, 1.10 mmol) were charged to a flame-dried ampule and toluene (~5 mL) was added. The mixture was stirred at room temperature for 1 hour and then sealed and stirred at 120 °C for a further 18 hours. The formed yellow-orange solution was filtered *via* cannula and the volatiles removed *in vacuo*. The oily residue was suspended in hexane (~10 mL) and stored at -30 °C to give an off-white solid which was collected by filtration. **Yield:** 520 mg, 50%.

**M.p.:** 182–184 °C (dec).

$^1\text{H}$  NMR (400 MHz,  $\text{C}_6\text{D}_6$ ):  $\delta$  1.24 (s, 18H,  $\text{C}(\underline{\text{C}}\underline{\text{H}}_3)_3$ ), 1.27 – 1.40 (m, 8H,  $\text{Cy}-\underline{\text{H}}$ ), 1.40 – 1.80 (m, 32H,  $\text{Cy}-\underline{\text{H}}$ ), 1.82 – 2.17 (m, 18H,  $\text{Cy}-\underline{\text{H}}$ ), 2.40 – 2.55 (m, 6H,  $\text{Cy}-\underline{\text{H}}$ ), 2.79 – 2.94 (m, 4H,  $\text{Cy}-\underline{\text{H}}$ ), 5.55 (s, 1H,  $\text{NCC}\underline{\text{H}}$ ), 7.10 (s, 4H,  $\text{TCHPAr}-\underline{\text{H}}$ ).

$^{13}\text{C}\{^1\text{H}\}$  NMR (101 MHz,  $\text{C}_6\text{D}_6$ ):  $\delta$  26.6, 26.7, 27.4, 27.5, 28.1 ( $\text{Cy}-\underline{\text{C}}$ ), 32.9 ( $\text{C}(\underline{\text{C}}\underline{\text{H}}_3)_3$ ), 34.3, 35.1, 35.7, 40.1 ( $\text{Cy}-\underline{\text{C}}$ ), 44.5 ( $\underline{\text{C}}(\text{CH}_3)_3$ ), 44.9 ( $\text{Cy}-\underline{\text{C}}$ ), 96.0 ( $\text{NCC}\underline{\text{H}}$ ), 123.5, 139.5, 142.2, 144.9 ( $\text{TCHPAr}-\underline{\text{C}}$ ), 179.3 ( $\text{NC}$ ).

**I.R.** (Nujol,  $\text{cm}^{-1}$ ): 2918 (s), 2847 (s), 1497 (s), 1447 (s), 1389 (s), 1347 (s), 1295 (s), 1214 (m), 1181 (m), 1131 (m), 1025 (m), 995 (m), 945 (w), 858 (s), 795 (w), 704 (m).

**Anal calcd.** for  $\text{C}_{59}\text{H}_{89}\text{MgN}_2\text{I}$ : C 72.49 %, H 9.18 %, N 2.87 %; found: C 72.14 %, H 9.82 %, N 2.32 %.

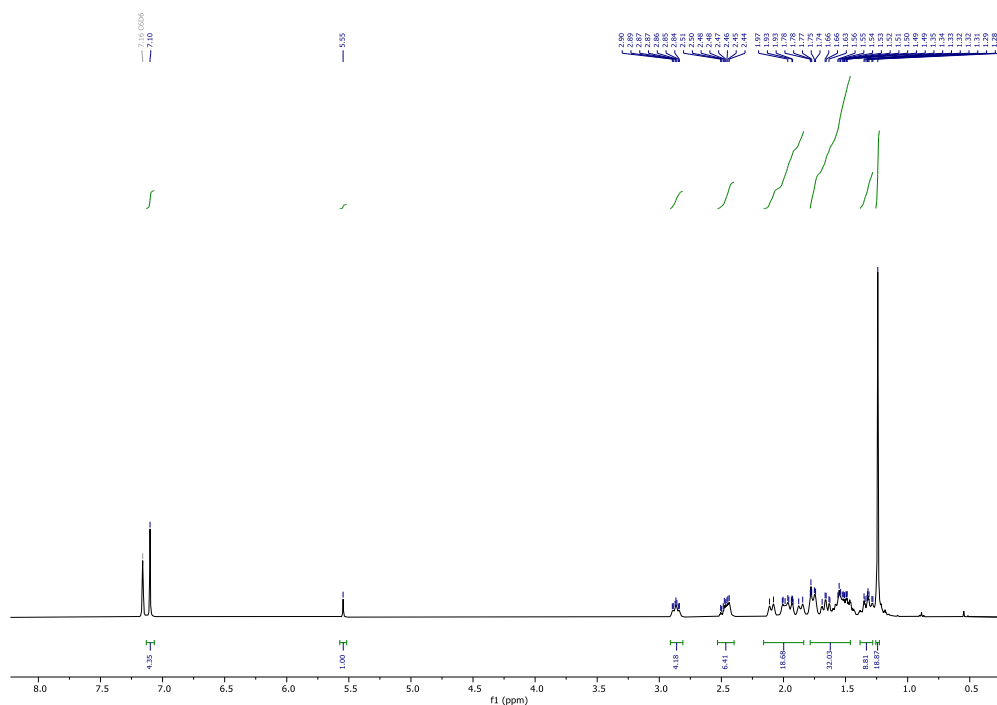

**Figure S54:**  $^1\text{H}$  NMR spectrum (400 MHz, 298 K,  $\text{C}_6\text{D}_6$ ) of **1**.

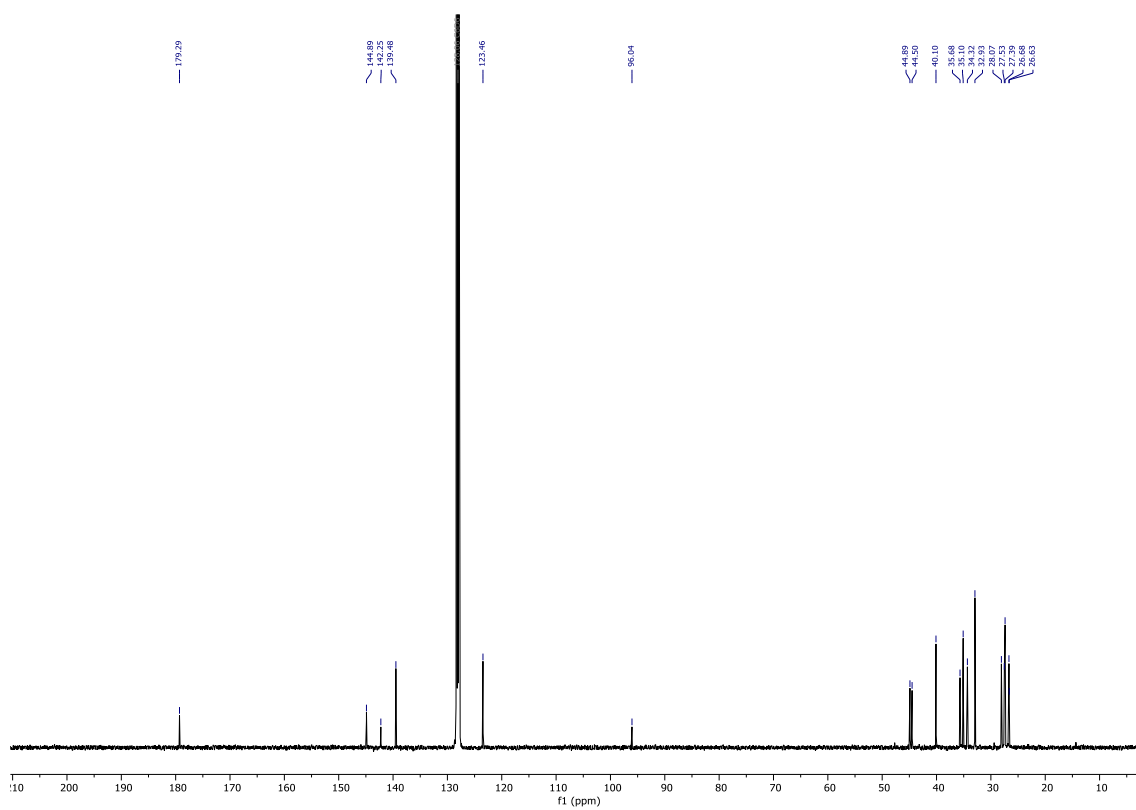

Figure S55:  $^{13}\text{C}\{^1\text{H}\}$  NMR spectrum (101 MHz, 298 K,  $\text{C}_6\text{D}_6$ ) of **1**.

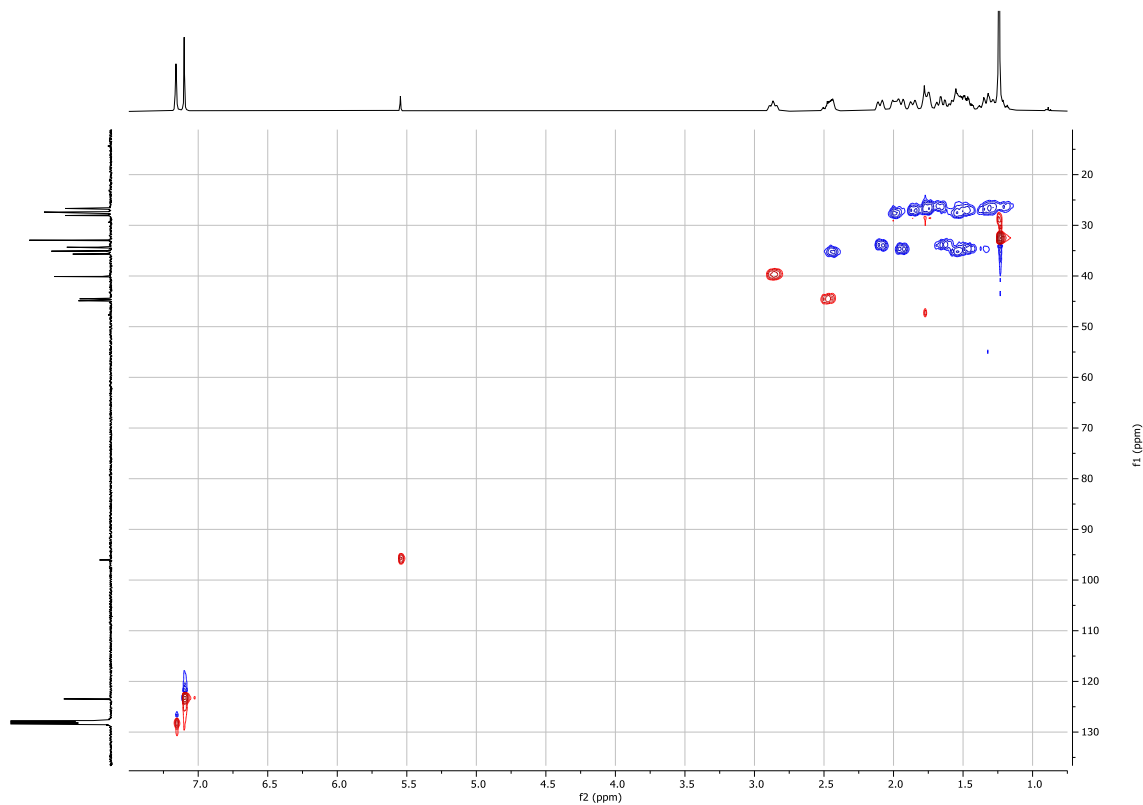

Figure S56: HSQC NMR spectrum (298 K,  $\text{C}_6\text{D}_6$ ) of **1**.

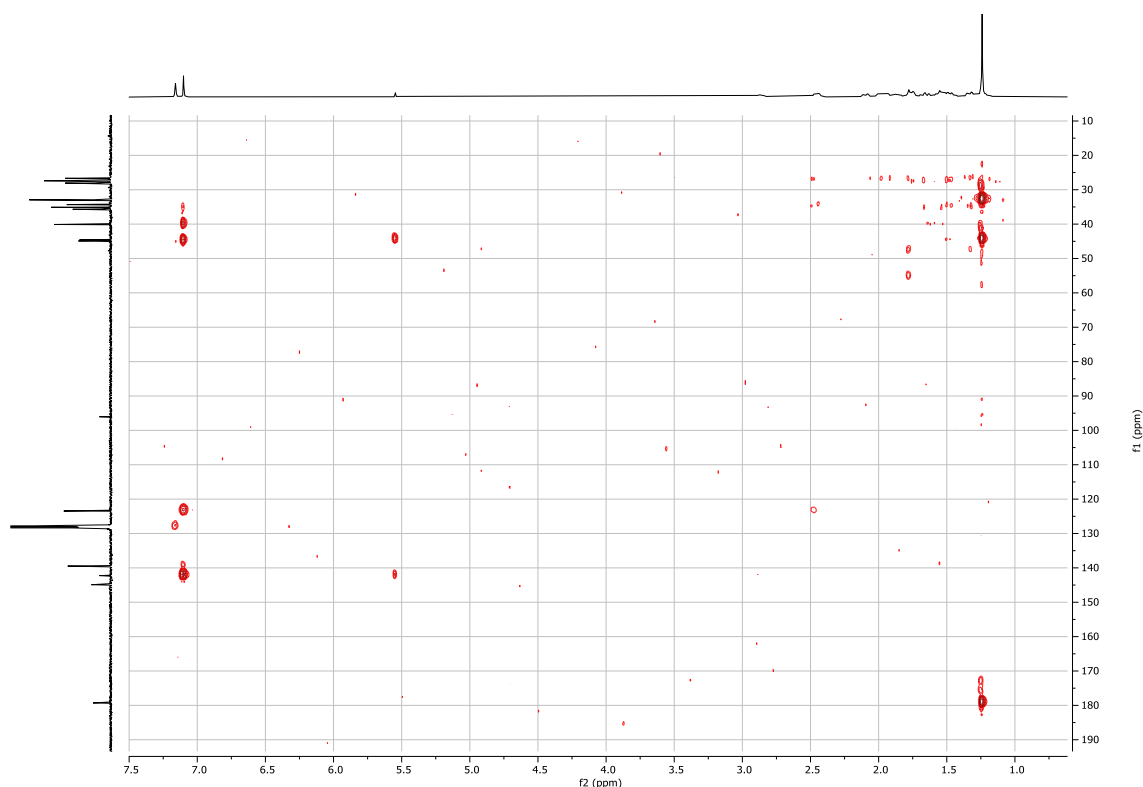

**Figure S57:** HMBC NMR spectrum (298 K, C<sub>6</sub>D<sub>6</sub>) of **1**.

### Preparation of [(<sup>TCHP</sup>Nacnac)Li(OEt<sub>2</sub>)] **2**

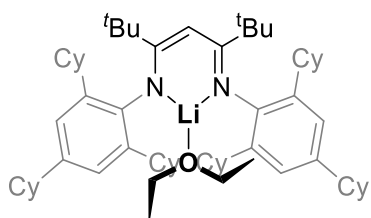

<sup>TCHP</sup>NacnacH (2.00 g, 2.42 mmol) was charged to a flame-dried ampule and toluene (~5 mL) was added. To this suspension was added methyl lithium (3 M in Et<sub>2</sub>O, 2.54 mmol, 0.85 mL) with stirring at room temperature. The mixture was stirred at room temperature for 1 hour, then sealed and stirred at 120 °C for a further 16 hours. The formed yellow solution was filtered *via* cannula and the volatiles removed *in vacuo*. The oily residue was suspended in hexane (~5 mL) and stored at –30 °C for 18 hours to give pale-yellow crystals. **Yield:** 2.19 g, 95%.

**M.p.:** 150–152 °C (dec).

$^1\text{H}$  NMR (400 MHz,  $\text{C}_6\text{D}_6$ ):  $\delta$  0.46 (t,  $J = 7.0$  Hz, 6H,  $\underline{Et}_2\text{O}$ ), 1.21 – 1.37 (m, 10H, Cy- $\underline{H}$ ), 1.39 (s, 18H,  $\text{C}(\underline{\text{CH}}_3)_3$ ), 1.44 – 2.17 (m, 50H, Cy- $\underline{H}$ ), 2.42 (q,  $J = 7.2$  Hz, 4H,  $\underline{Et}_2\text{O}$ ), 2.46 – 2.54 (m, 2H, Cy- $\underline{H}$ ), 3.00 – 3.12 (m, 4H, Cy- $\underline{H}$ ), 5.37 (s, 1H,  $\text{NCC}\underline{\text{H}}$ ), 6.96 (s, 4H,  $\text{TCHPAr-}\underline{\text{H}}$ ).

$^{13}\text{C}\{^1\text{H}\}$  NMR (101 MHz,  $\text{C}_6\text{D}_6$ ):  $\delta$  13.7 ( $\underline{Et}_2\text{O}$ ), 26.8, 27.1, 27.5, 27.6, 27.7, 27.9 (Cy- $\underline{\text{C}}$ ), 33.5 ( $\text{C}(\underline{\text{CH}}_3)_3$ ), 34.0, 34.9, 35.6, 39.0 (Cy- $\underline{\text{C}}$ ), 44.6 ( $\underline{\text{C}}(\text{CH}_3)_3$ ), 45.0 (Cy- $\underline{\text{C}}$ ), 63.9 ( $\underline{Et}_2\text{O}$ ), 93.0 ( $\text{NCC}\underline{\text{H}}$ ), 122.3, 137.7, 140.0, 149.8 ( $\text{TCHPAr-}\underline{\text{C}}$ ), 172.1 ( $\underline{\text{N}}\underline{\text{C}}$ ).

$^7\text{Li}$  NMR (156 MHz,  $\text{C}_6\text{D}_6$ ):  $\delta$  1.39 ( $\underline{\text{Li}}\text{OEt}_2$ ).

**I.R.** (solid,  $\text{cm}^{-1}$ ): 2922 (s), 2845 (s), 1656 (m), 1608 (w) 1520 (m), 1441 (s), 1400 (m), 1360 (m), 1233 (w), 1141 (m), 1097 (m), 993 (w), 943 (w), 858 (s), 708 (w), 604 (w).

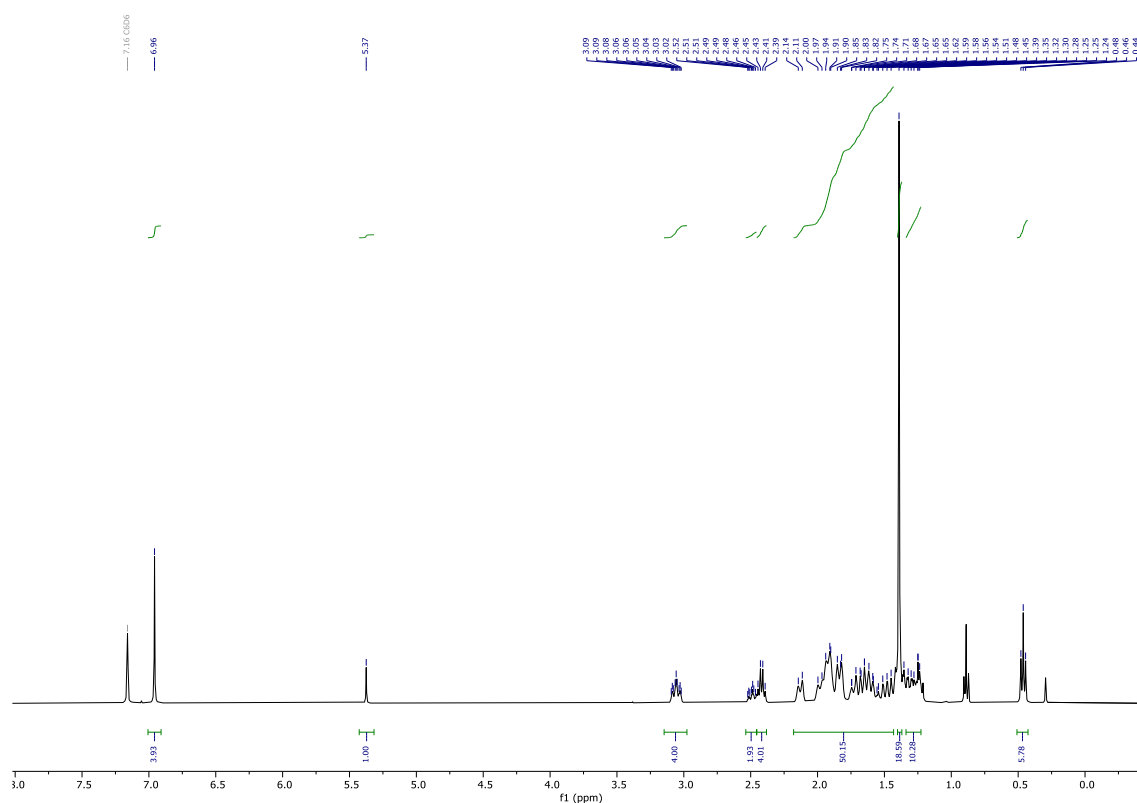

**Figure S58:**  $^1\text{H}$  NMR spectrum (400 MHz, 298 K,  $\text{C}_6\text{D}_6$ ) of **2**.

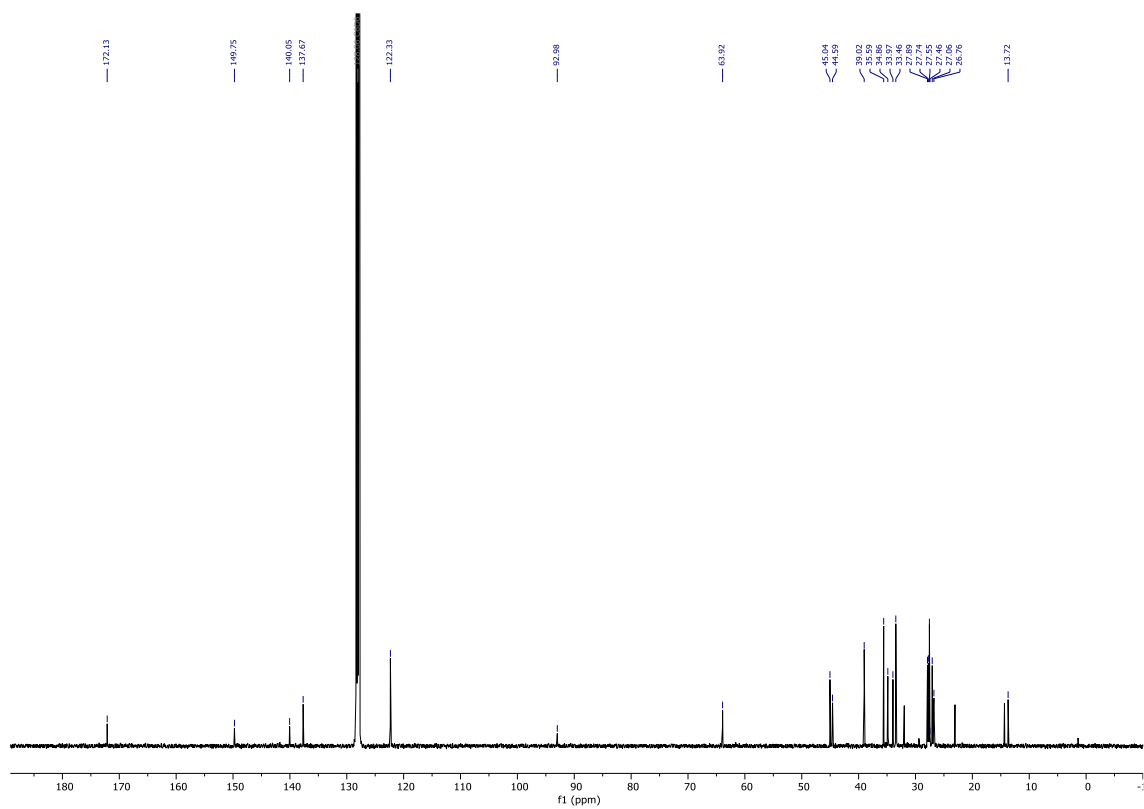

**Figure S59:**  $^{13}\text{C}\{^1\text{H}\}$  NMR spectrum (101 MHz, 298 K,  $\text{C}_6\text{D}_6$ ) of **2**.

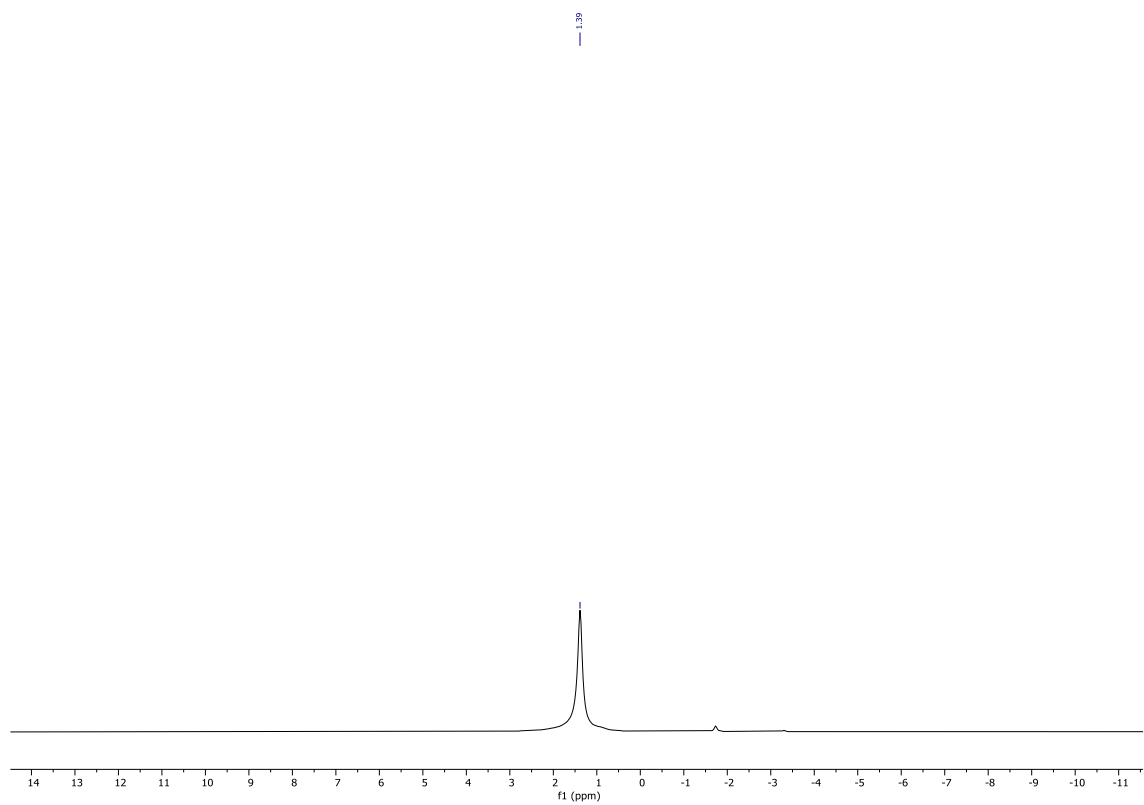

**Figure S60:**  $^7\text{Li}$  NMR spectrum (101 MHz, 298 K,  $\text{C}_6\text{D}_6$ ) of **2**.

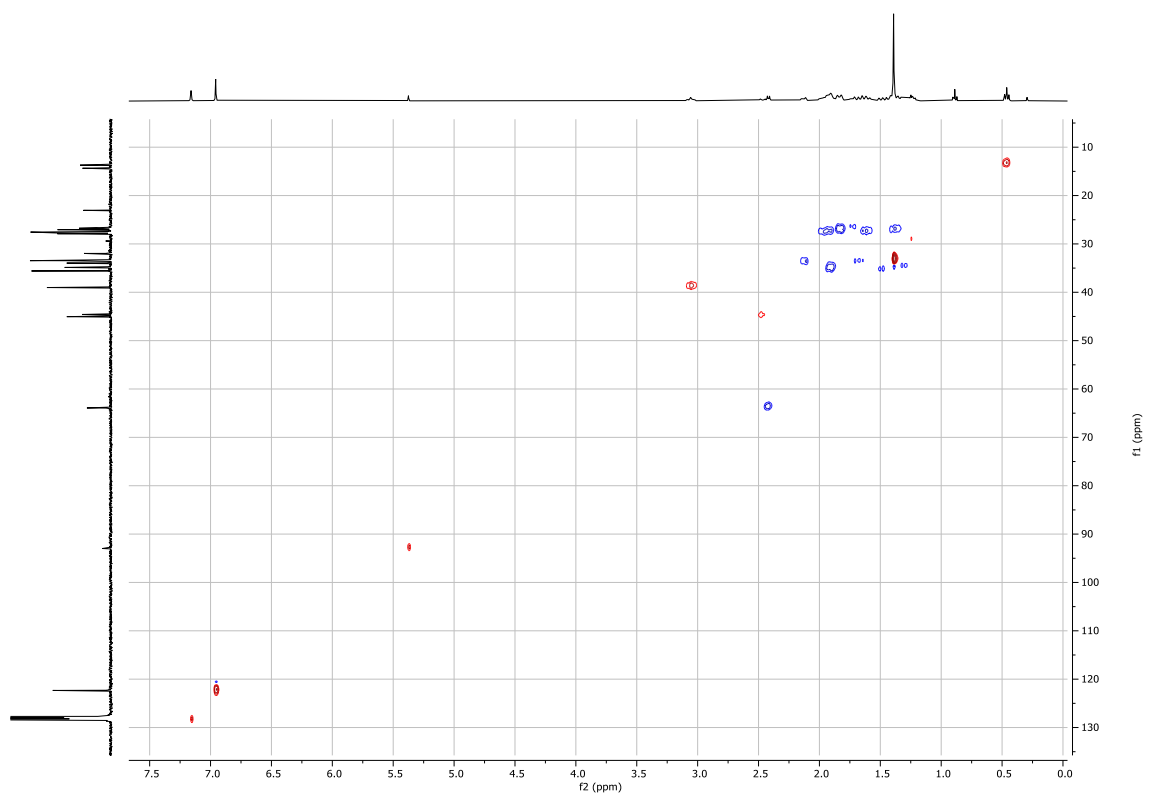

**Figure S61:** HSQC NMR spectrum (298 K,  $C_6D_6$ ) of **2**.

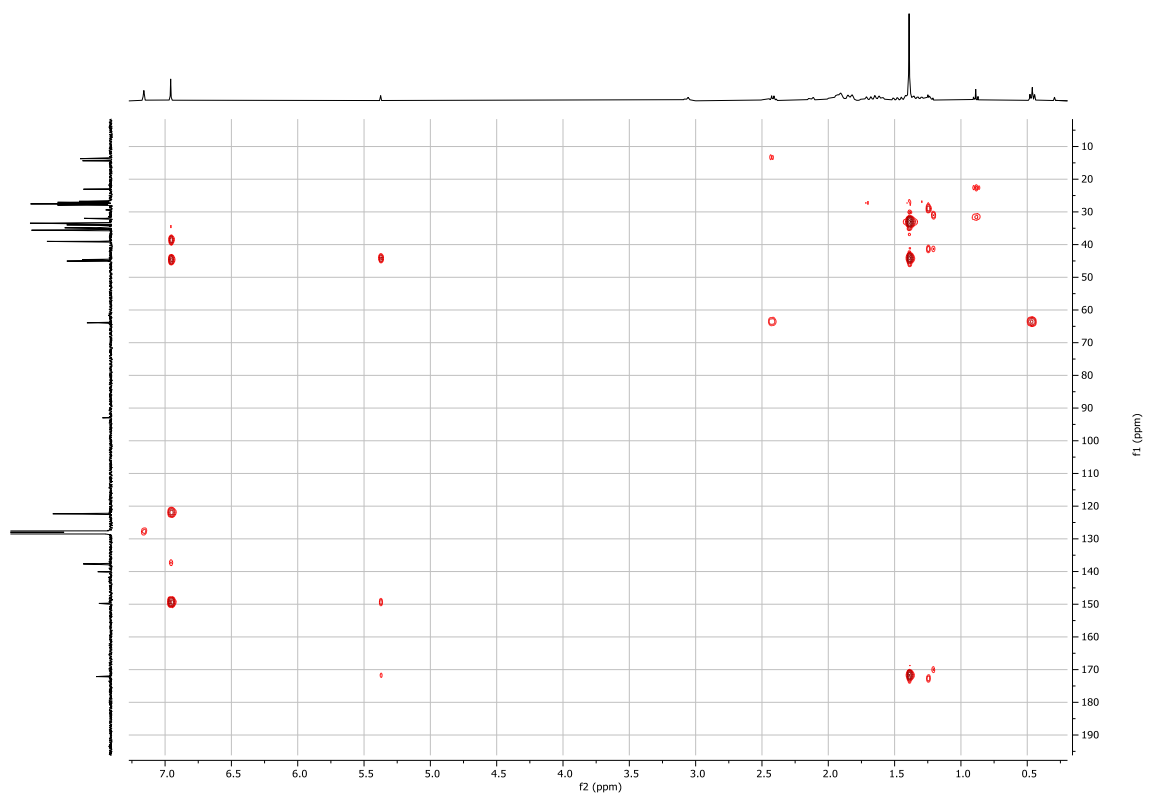

**Figure S62:** HMBC NMR spectrum (298 K,  $C_6D_6$ ) of **2**.

## Preparation of [ $^{DCHP}Nacnac$ ]MgI **3** and [ $^{DCHP}Nacnac$ ]MgMe **3-Me**

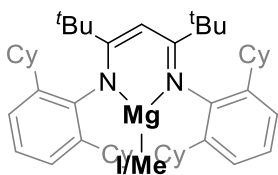

$^{DCHP}NacnacH$  (1.50 g, 2.26 mmol) was charged to a flame-dried ampule and toluene (~5 mL) was added. To the resultant suspension was added methyl magnesium iodide (3M in  $Et_2O$ , 3.39 mmol, 1.13 mL) at room temperature. The mixture was stirred at room temperature for 1 hour, then sealed and stirred at 120 °C for 3 days. The formed orange solution was filtered *via* cannula and the volatiles removed *in vacuo*. The oily residue was suspended in hexane (~10 mL) to give an off-white solid which was collected by filtration and washed with hexane (3 x 5 mL). The supernatant was reduced in volume to provide a second crop of pale yellow crystals. **Yield:** 1.596 g (crystalline mixture of **3** and **3-Me** in an approx. 50:50 ratio).

**M.p.:** 294–296 °C (dec).

$^1H$  NMR (400 MHz,  $C_6D_6$ ):  $\delta$  -1.39 (br s, 3H, ~50%,  $CH_3$ ) 0.86\* (t, J = 7.2 Hz, 3H,  $Et_2O$ ), 1.21 (s, 18H,  $C(CH_3)_3$ ), 1.23 – 1.29 (m, 4H,  $Cy-H$ ), 1.34 – 1.57 (m, 16H,  $Cy-H$ ), 1.64 – 1.85 (m, 8H,  $Cy-H$ ), 1.91 – 2.05 (m, 8H,  $Cy-H$ ), 2.13 – 2.56 (m, 4H,  $Cy-H$ ), 2.71 – 2.94 (m, 4H,  $Cy-H$ ), 3.51\* (q, J = 7.2 Hz, 2H,  $Et_2O$ ), 5.54 (s, 1H,  $NCC-H$ ), 7.00 – 7.14 (m, 6H,  $^{DCHP}Ar-H$ ).

$^{13}C\{^1H\}$  NMR (101 MHz,  $C_6D_6$ ):  $\delta$  -18.1 ( $CH_3$ ), 14.0\* ( $Et_2O$ ), 26.6, 27.5, 28.0 ( $Cy-C$ ), 32.9 ( $C(CH_3)_3$ ), 34.1, 35.3, 39.9 ( $Cy-C$ ), 44.6 ( $C(CH_3)_3$ ), 66.6\* ( $Et_2O$ ), 96.0 ( $NCC-H$ ), 125.1, 134.9, 139.9, 144.6 ( $^{DCHP}Ar-C$ ), 178.0 ( $NC$ ).

**I.R.** (solid,  $cm^{-1}$ ): 2922 (s), 2850 (s), 1618 (w), 1534 (w), 1498 (m), 1465 (w), 1444 (m), 1383 (s), 1364 (s), 1349 (s), 1303 (m), 1211 (m), 1182 (m), 1150 (w), 1131 (m), 1079 (w), 1023 (w), 995 (w), 937 (m), 891 (w), 878 (w), 841 (w), 794 (w), 762 (s), 714 (s), 699 (w), 669 (w).

\*N.B. residual diethyl ether was difficult to fully remove from the bulk material which may suggest weak coordination of diethyl ether to the magnesium centre of **3** or **3-Me**. However, ether coordination was not observed in the crystal structure of the co-crystallised mixture.

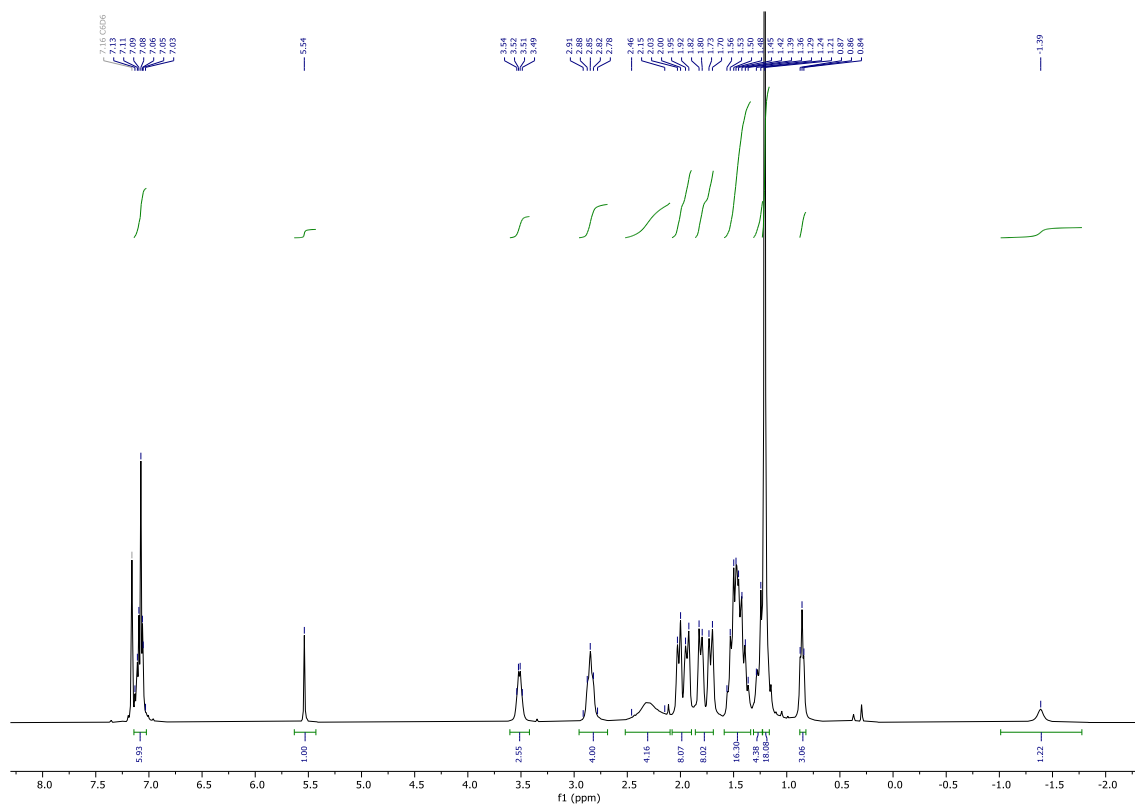

**Figure S63:**  $^1\text{H}$  NMR spectrum (400 MHz, 298 K,  $\text{C}_6\text{D}_6$ ) of a co-crystallised mixture of **3** and **3-Me**.

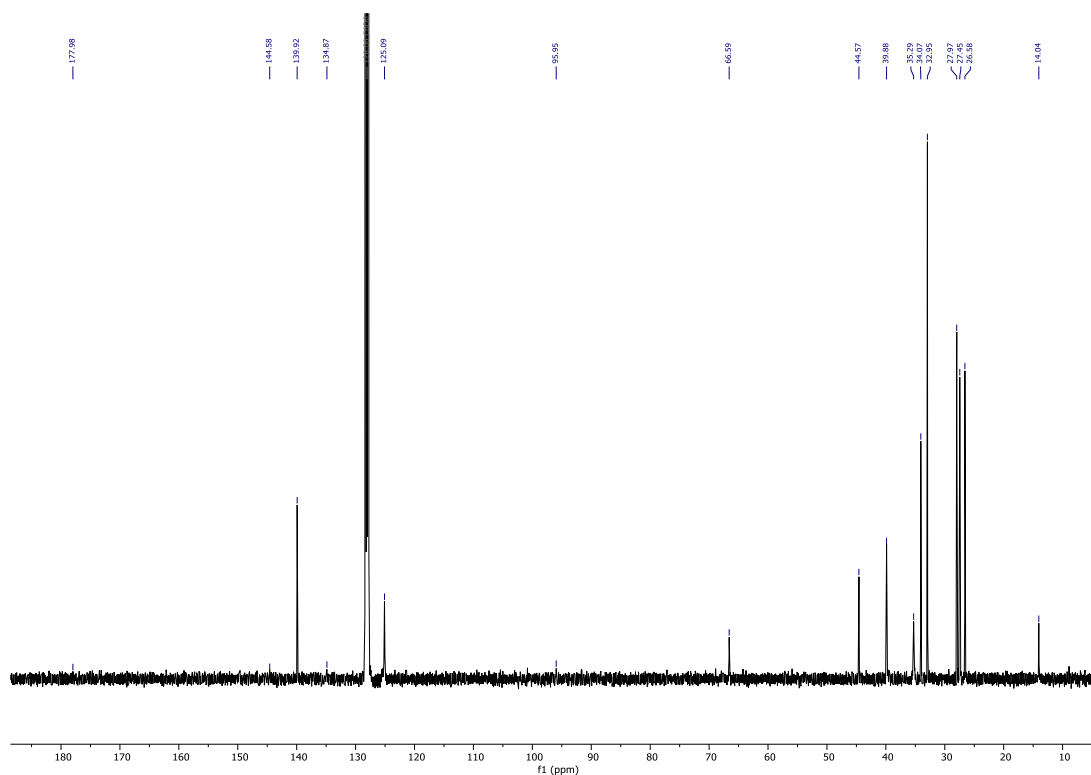

**Figure S64:**  $^{13}\text{C}\{^1\text{H}\}$  NMR spectrum (101 MHz, 298 K,  $\text{C}_6\text{D}_6$ ) of a co-crystallised mixture of **3** and **3-Me**.

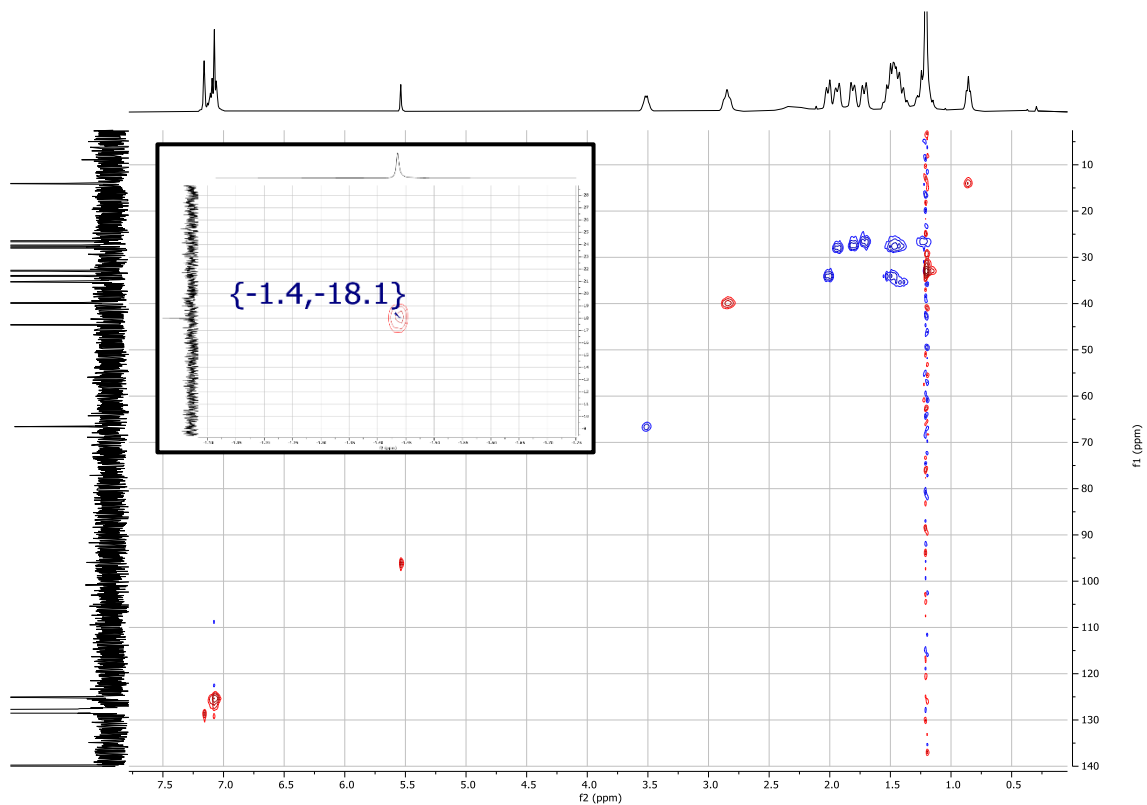

**Figure S65:** HSQC NMR spectrum (298 K,  $C_6D_6$ ) of a co-crystallised mixture of **3** and **3-Me**. Inset: HSQC NMR spectrum including negative ppm range.

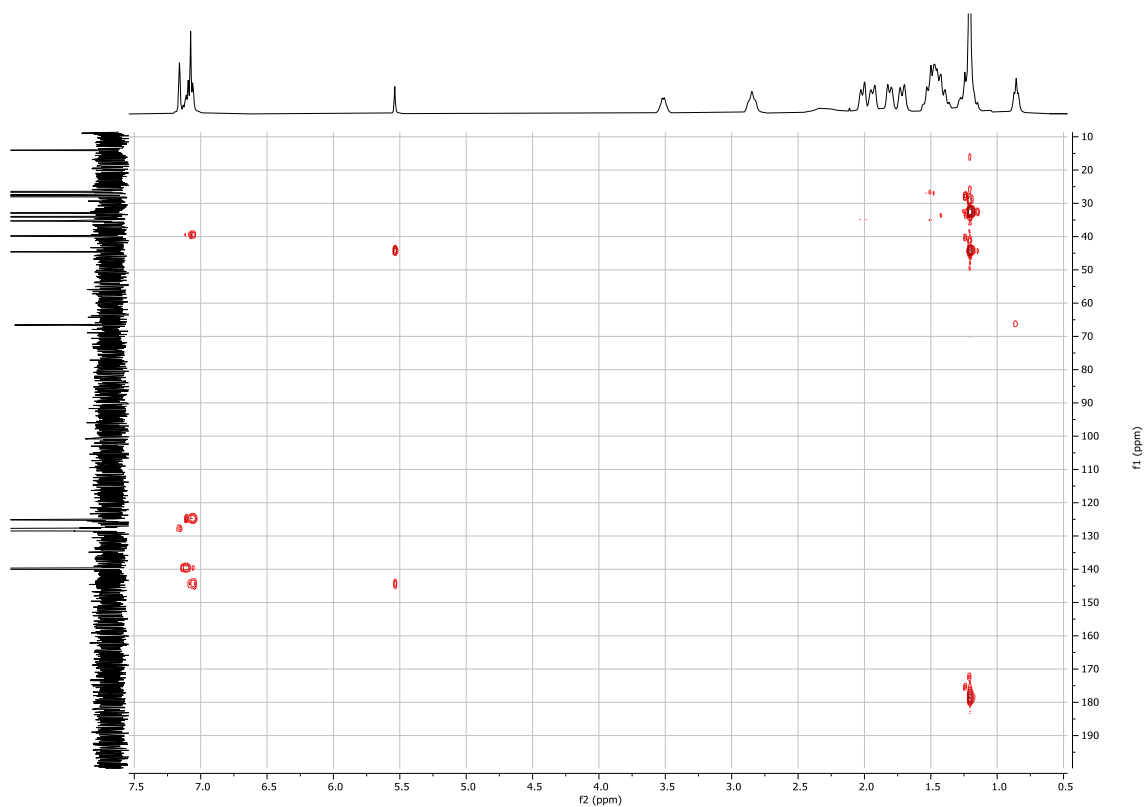

**Figure S66:** HMBC NMR spectrum (298 K,  $C_6D_6$ ) of a co-crystallised mixture of **3** and **3-Me**.

## Preparation of [(<sup>TCHP/Dip</sup>Nacnac)K] 4

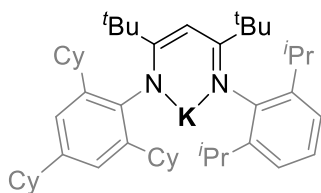

<sup>TCHP/Dip</sup>NacnacH (3.00 g, 4.51 mmol) and benzyl potassium (0.881 g, 6.77 mmol) were charged to a flame-dried ampule and toluene (~20 mL) was added. The mixture was allowed to stir at room temperature for 1 hour and then sealed and stirred at 120 °C for 16 hours. The reaction mixture was cooled to room temperature, filtered *via* cannula, and the solvent removed under vacuum. The resultant oily solid residue was suspended in hexane (~20 mL), sonicated for 10 minutes, and then stored at -30 °C for 24 hours. The resultant yellow-red precipitated solid was collected by filtration and dried under vacuum. **Yield:** 2.92 g, 92%.

**M.p.:** > 260 °C (dec).

<sup>1</sup>H NMR (400 MHz, C<sub>6</sub>D<sub>6</sub>): δ 0.80 (d, J = 6.8 Hz, 6H, CH(CH<sub>3</sub>)<sub>2</sub>), 0.93 – 1.12 (m, 8H, Cy-H), 1.16 (s, 18H, C(CH<sub>3</sub>)<sub>3</sub>), 1.17 – 1.20 (m, 6H, CH(CH<sub>3</sub>)<sub>2</sub>), 1.22 – 1.47 (m, 8H, Cy-H), 1.47 – 1.74 (m, 10H, Cy-H), 1.76 – 1.94 (m, 4H, Cy-H), 2.26 – 2.37 (m, 1H, Cy-H), 2.59 – 2.74 (m, 2H, Cy-H), 3.02 (hept, J = 7.0 Hz, 2H, CH(CH<sub>3</sub>)<sub>2</sub>), 4.77 (s, 1H, NCCH), 6.62 (t, J = 7.6 Hz, 1H, DippAr-H), 6.74 (s, 2H, TCHPAr-H), 6.82 (d, J = 7.6 Hz, 2H, DippAr-H).

<sup>13</sup>C{<sup>1</sup>H} NMR (101 MHz, C<sub>6</sub>D<sub>6</sub>): δ 23.6, 24.4 (CH(CH<sub>3</sub>)<sub>2</sub>), 26.8 (CH(CH<sub>3</sub>)<sub>2</sub>), 27.0, 27.5, 27.6, 27.7, 27.7 (Cy-C), 32.9, 32.9 (C(CH<sub>3</sub>)<sub>3</sub>), 34.1, 35.5, 35.6, 38.5 (Cy-C), 44.4, 44.5 (C(CH<sub>3</sub>)<sub>3</sub>), 44.9 (Cy-C), 90.4 (NCCH), 118.3, 122.8, 123.7, 134.4, 135.9, 137.0, 150.1, 152.0 (TCHPAr-C, DippAr-C), 166.9, 167.5 (NC).

**I.R.** (solid, cm<sup>-1</sup>): 2920 (s), 2850 (s), 1558 (m), 1472 (s), 1435 (s), 1390 (m), 1336 (m), 1314 (s), 1295 (w), 1258 (w), 1210 (s), 1172 (m), 1120 (w), 1087 (m), 1023 (w), 997 (w), 941 (w), 915 (m), 867 (m), 839 (w), 822 (w), 802 (w), 773 (m).

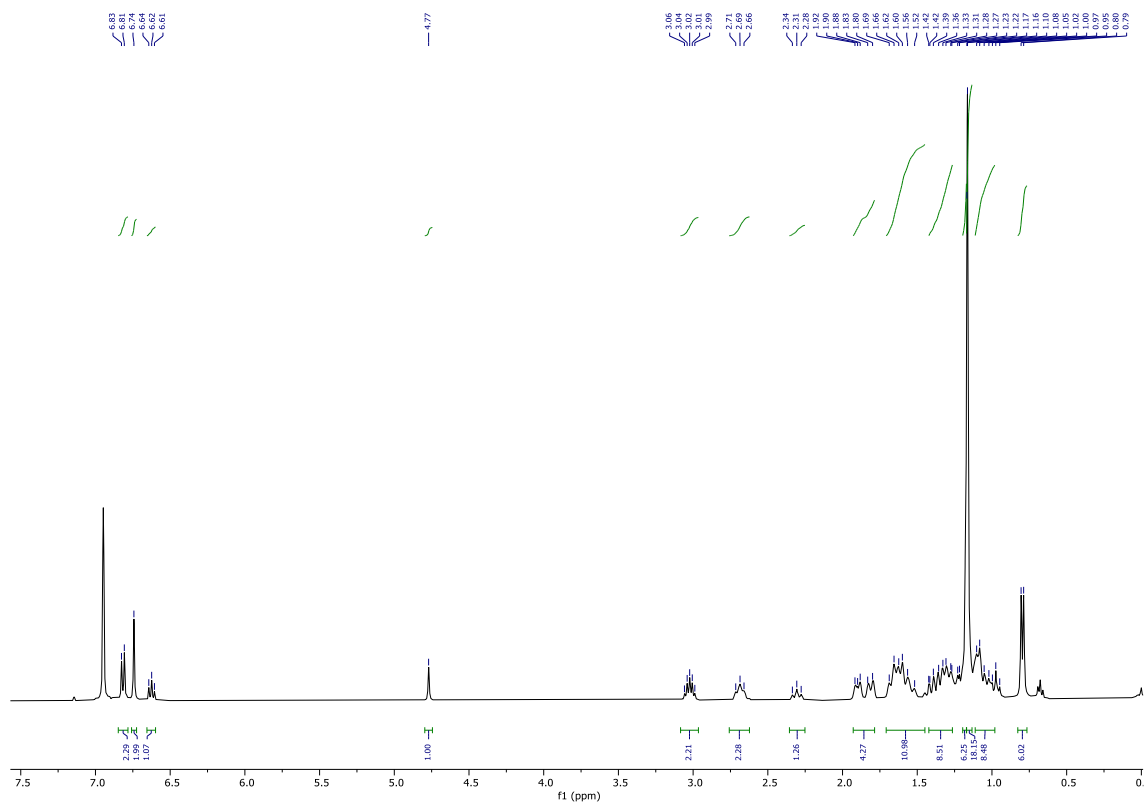

**Figure S67:**  $^1\text{H}$  NMR spectrum (400 MHz, 298 K,  $\text{C}_6\text{D}_6$ ) of **4**.

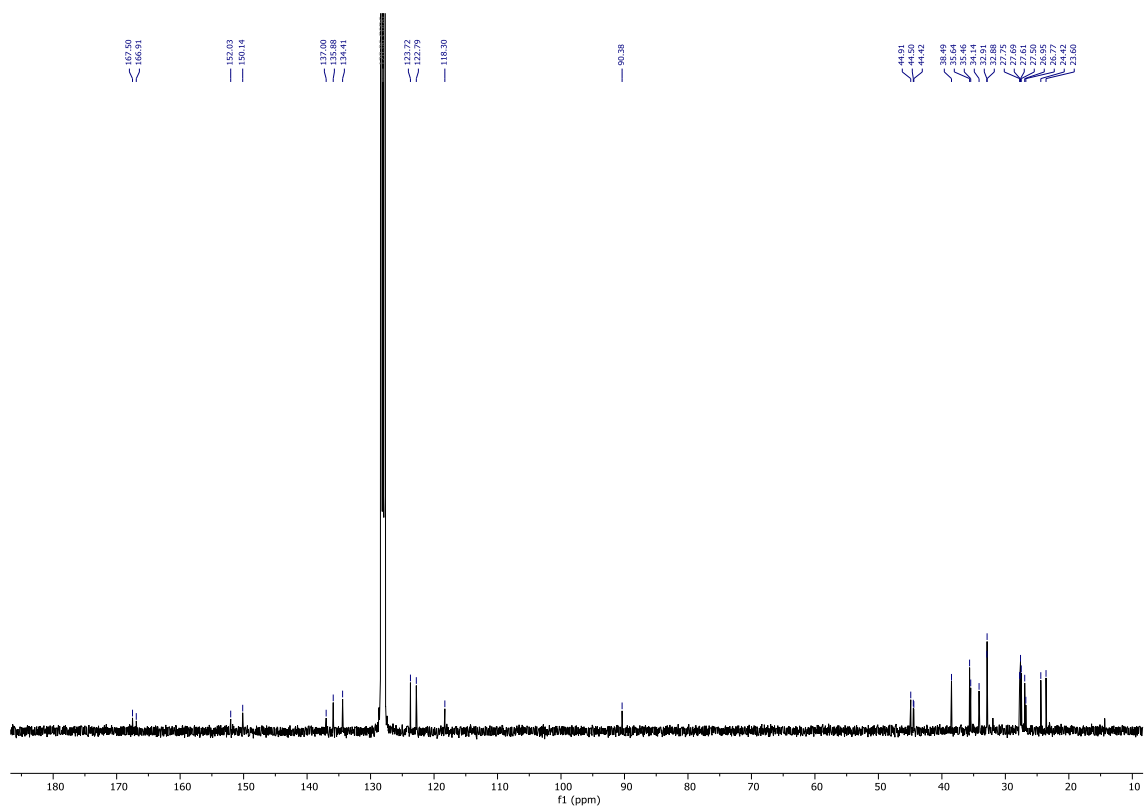

**Figure S68:**  $^{13}\text{C}\{^1\text{H}\}$  NMR spectrum (101 MHz, 298 K,  $\text{C}_6\text{D}_6$ ) of **4**.

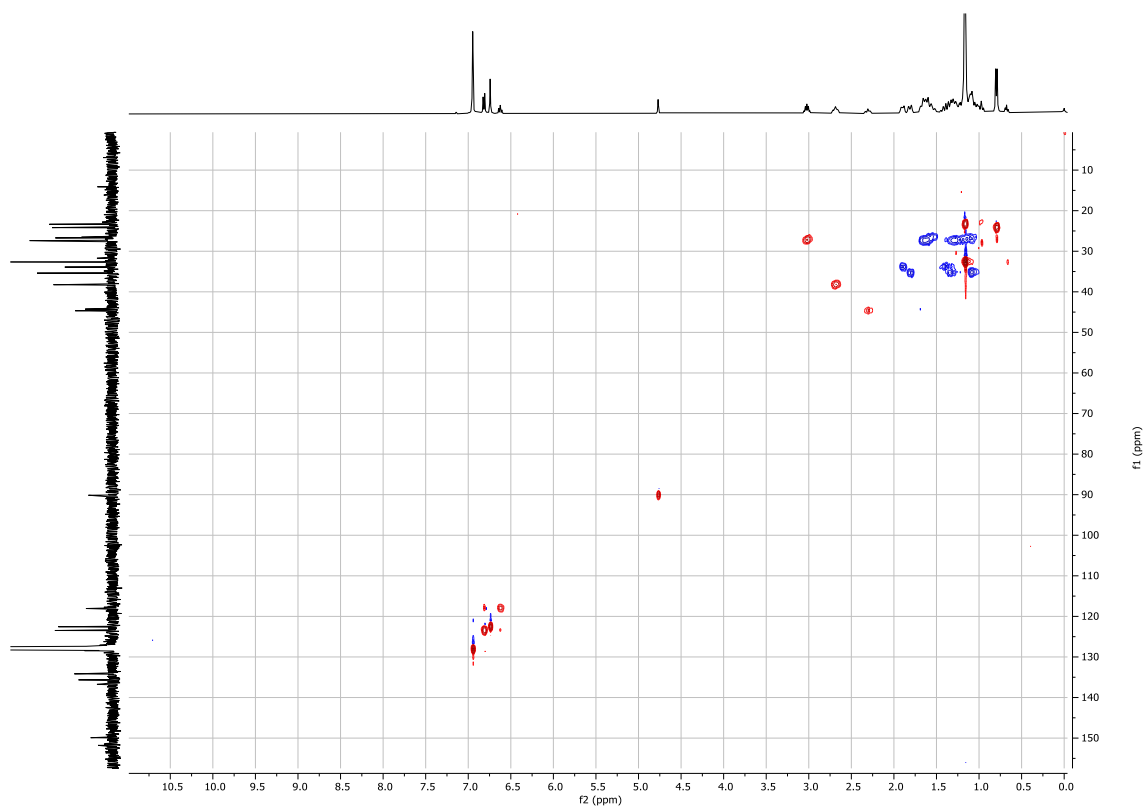

Figure S69: HSQC NMR spectrum (298 K, C<sub>6</sub>D<sub>6</sub>) of **4**.

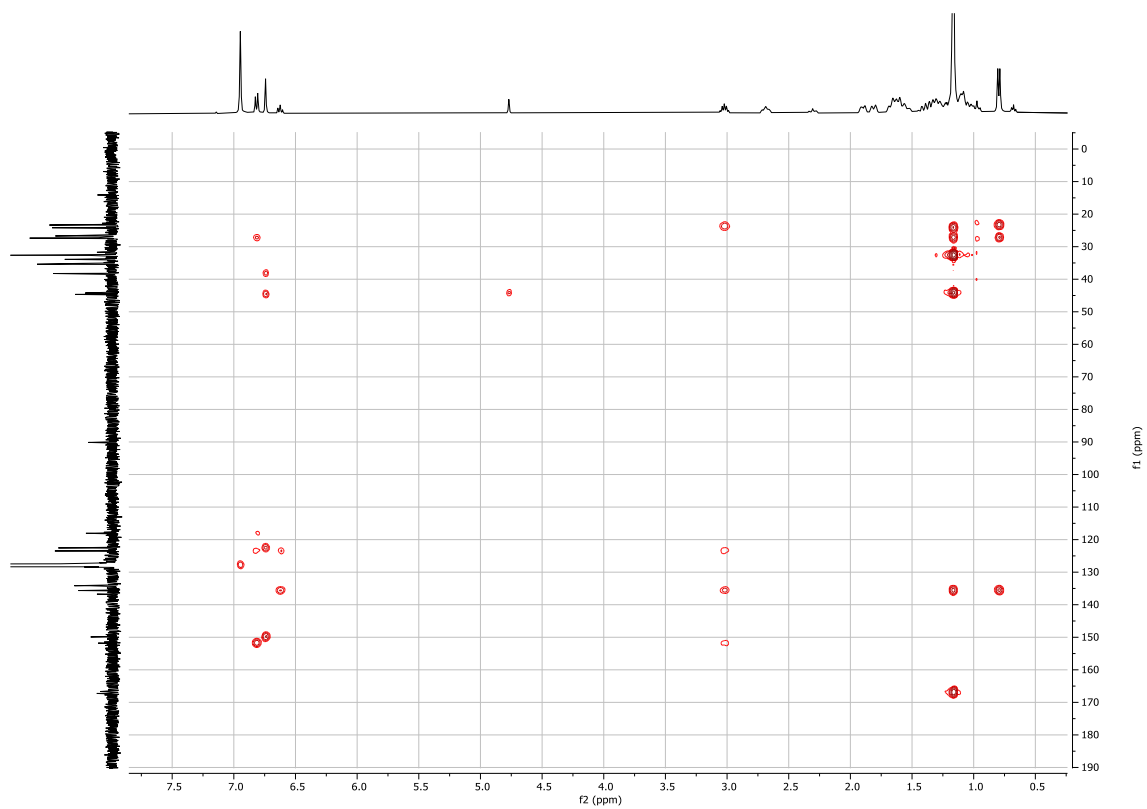

Figure S70: HMBC NMR spectrum (298 K, C<sub>6</sub>D<sub>6</sub>) of **4**.

## Preparation of [(<sup>TCHP/Dip</sup>Nacnac)MgI] 5

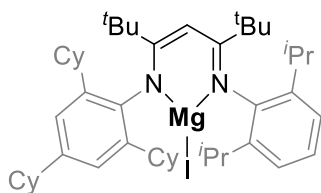

[(<sup>TCHP/Dip</sup>Nacnac)K] (704 mg, 1.00 mmol) and MgI<sub>2</sub>(OEt<sub>2</sub>)<sub>2</sub> (469 mg, 1.10 mmol, 1.1 eqv) were charged to a flame-dried ampule and toluene (~10 mL) was added. The mixture was allowed to stir at room temperature for 1 hour and then sealed and stirred at 120 °C for 18 hours. The formed pale-yellow solution was filtered *via* cannula and the volatiles removed *in vacuo*. The oily solid residue was dissolved in hexane (~10 mL) and stored at -30 °C to give an off-white solid precipitate which was collected by filtration. **Yield:** 540 mg, 66%.

**M.p.:** 188–190 °C (dec).

**<sup>1</sup>H NMR** (400 MHz, C<sub>6</sub>D<sub>6</sub>): δ 1.16 (s, 9H, C(CH<sub>3</sub>)<sub>3</sub>), 1.22 (s, 9H, C(CH<sub>3</sub>)<sub>3</sub>), 1.32 (d, J = 6.8 Hz, 6H, CH(CH<sub>3</sub>)<sub>2</sub>), 1.34 – 1.44 (m, 8H, Cy-H), 1.48 (d, J = 6.8 Hz, 6H, CH(CH<sub>3</sub>)<sub>2</sub>), 1.58 – 2.07 (m, 20H, Cy-H), 2.22 – 2.33 (m, 2H, Cy-H), 2.39 – 2.55 (m, 1H, Cy-H), 2.77 – 2.91 (m, 2H, Cy-H), 3.23 (hept, J = 6.9 Hz, 2H, CH(CH<sub>3</sub>)<sub>2</sub>), 5.42 (s, 1H, NCCH), 7.01 – 7.13 (m, 6H, <sup>TCHP</sup>Ar-H, <sup>Dipp</sup>Ar-H).

**<sup>13</sup>C{<sup>1</sup>H} NMR** (101 MHz, C<sub>6</sub>D<sub>6</sub>): δ 23.4, 25.6 (CH(CH<sub>3</sub>)<sub>2</sub>), 26.6, 27.4, 27.6, 28.0 (Cy-C), 28.7 (CH(CH<sub>3</sub>)<sub>2</sub>), 32.8, 33.7 (C(CH<sub>3</sub>)<sub>3</sub>), 35.1, 36.5, 40.1 (Cy-C), 44.1, 44.2 (C(CH<sub>3</sub>)<sub>3</sub>), 44.9 (Cy-C), 95.6 (NCCH), 123.3, 124.0, 126.1, 139.2, 141.4, 142.1, 143.8, 145.2 (<sup>TCHP</sup>Ar-C, <sup>Dipp</sup>Ar-C), 177.9, 178.0 (NC).

**I.R.** (solid, cm<sup>-1</sup>): 2920 (s), 2850 (s), 1608 (w), 1508 (m), 1446 (m), 1381 (s), 1362 (s), 1316 (m), 1258 (w), 1217 (w), 1195 (m), 1128 (w), 1098 (w), 1027 (m), 997 (w), 936 (w), 878 (w), 863 (w), 841 (w), 801 (w), 762 (m), 727 (w).

A reproducible microanalysis could not be obtained due to the extreme air and moisture sensitivity of the complex, and the inability to remove traces of <sup>TCHP/Dip</sup>NacnacH after repeated recrystallizations.

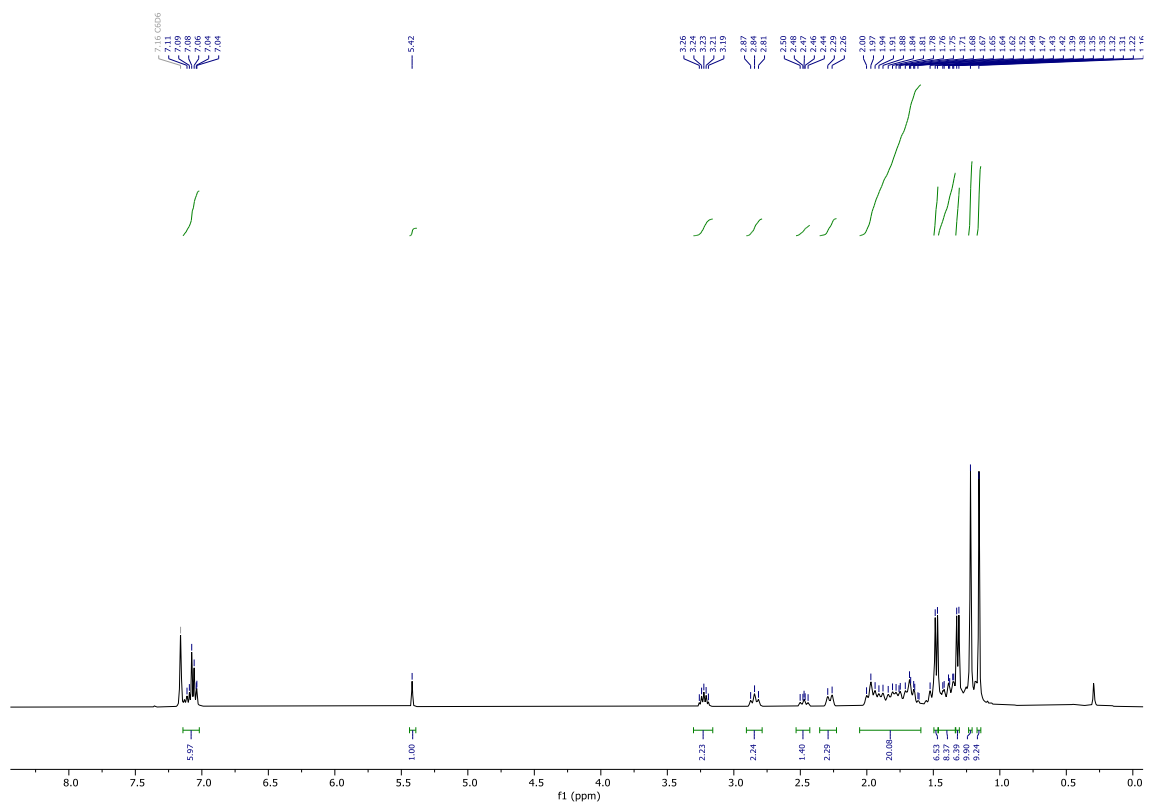

Figure S71:  $^1\text{H}$  NMR spectrum (400 MHz, 298 K,  $\text{C}_6\text{D}_6$ ) of **5**.

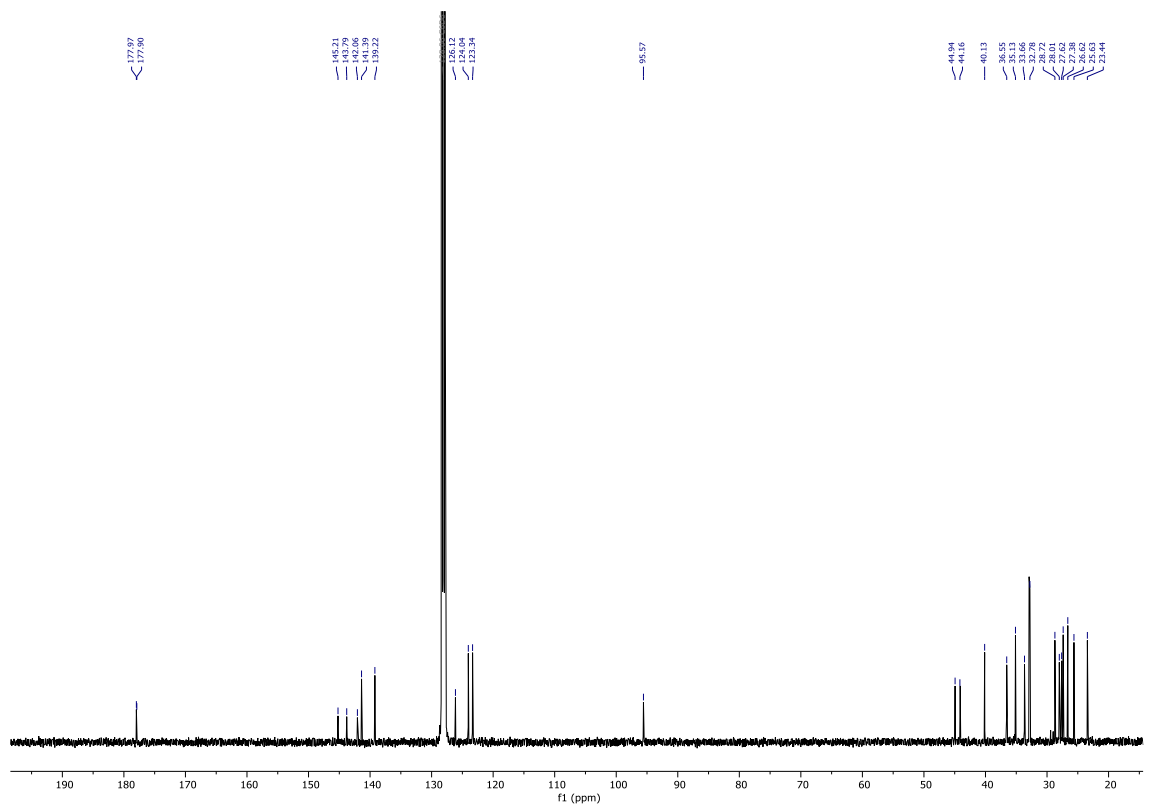

Figure S72:  $^{13}\text{C}\{^1\text{H}\}$  NMR spectrum (101 MHz, 298 K,  $\text{C}_6\text{D}_6$ ) of **5**.

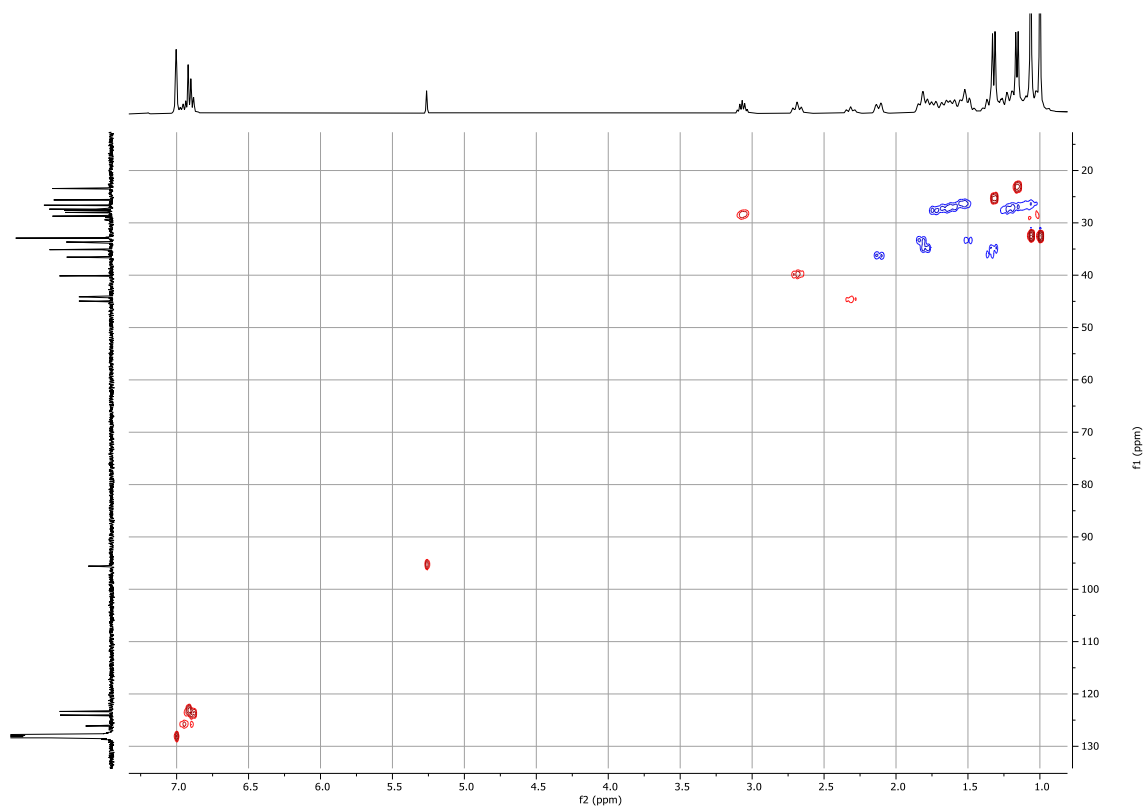

Figure S73: HSQC NMR spectrum (298 K, C<sub>6</sub>D<sub>6</sub>) of **5**.

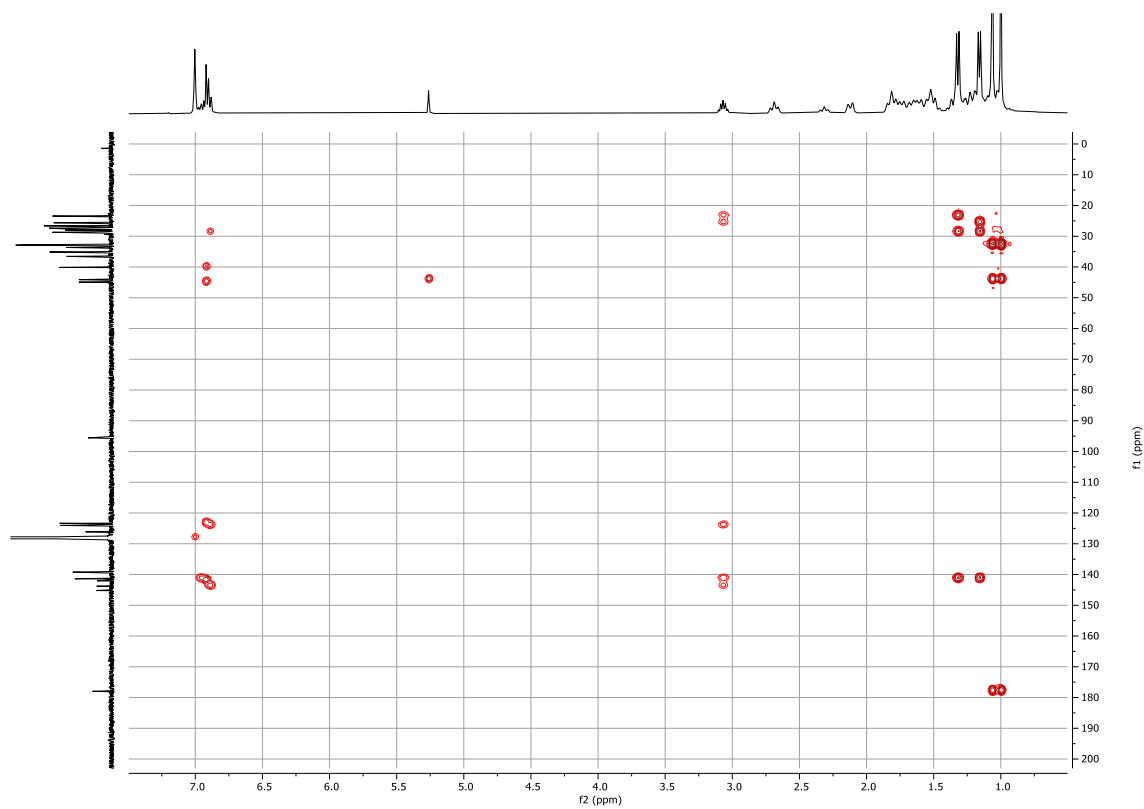

Figure S74: HMBC NMR spectrum (298 K, C<sub>6</sub>D<sub>6</sub>) of **5**.

## Preparation of $[\{(\text{TCHP}^{\text{Nacnac}}\text{Mg})\text{Na}\}_2] \mathbf{6}$

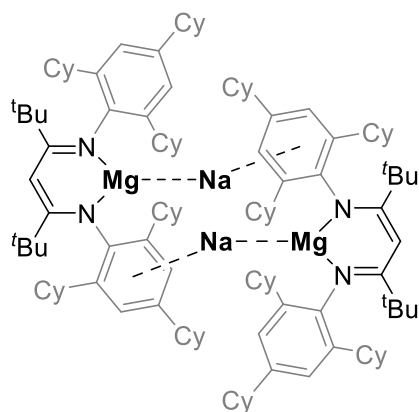

Compound **1** (2.00 g, 2.45 mmol) and Na/NaCl (5% w/w, 4.92 g, 10.70 mmol) were charged to a 50 mL ampule and methylcyclohexane (20 mL) was added. The reaction mixture was allowed to stir for 18 hours at room temperature. The volatiles were removed *in vacuo*, the residue extracted with hexane (50 mL) and filtered to give a dark red solution. The filtrate was concentrated to *ca.* 5 mL and then stored at room temperature for 18 hours, resulting in the formation of dark red block-shaped crystals.

**Yield:** 1.52 g, 85 %.

**M.p.:** 170–172 °C (dec).

**$^1\text{H}$  NMR** (400 MHz,  $\text{C}_6\text{D}_6$ ):  $\delta$  1.26 (s, 18H,  $\text{C}(\underline{\text{C}}\text{H}_3)_3$ ), 1.32 – 1.73 (m, 30H,  $\text{Cy}-\underline{\text{H}}$ ), 1.73 – 2.17 (m, 26H,  $\text{Cy}-\underline{\text{H}}$ ), 2.44 – 2.56 (m, 2H,  $\text{Cy}-\underline{\text{H}}$ ), 2.63 – 2.76 (m, 4H,  $\text{Cy}-\underline{\text{H}}$ ), 2.86 – 3.05 (m, 4H,  $\text{Cy}-\underline{\text{H}}$ ), 5.41 (s, 1H,  $\text{NCC}\underline{\text{H}}$ ), 7.04 (s, 4H,  $\text{TCHPAr}-\underline{\text{H}}$ ).

**$^{13}\text{C}\{^1\text{H}\}$  NMR** (101 MHz,  $\text{C}_6\text{D}_6$ ):  $\delta$  26.8, 27.1, 27.5, 27.6, 27.8 ( $\text{Cy}-\underline{\text{C}}$ ), 33.4 ( $\text{C}(\underline{\text{C}}\text{H}_3)_3$ ), 34.3, 35.2, 35.5, 39.3 ( $\text{Cy}-\underline{\text{C}}$ ), 44.0 ( $\underline{\text{C}}(\text{CH}_3)_3$ ), 44.5 ( $\text{Cy}-\underline{\text{C}}$ ), 95.3 ( $\text{NCC}\underline{\text{H}}$ ), 121.9, 140.5, 142.3, 148.1 ( $\text{TCHPAr}-\underline{\text{C}}$ ), 173.8 ( $\text{NC}$ ).

**I.R.** (Nujol,  $\text{cm}^{-1}$ ): 1510 (m), 1135 (m), 1110 (w), 1025 (w), 993 (w), 954 (w), 889 (w), 866 (m), 781 (m) 706 (m), 608 (w).

**Anal. calcd.** for  $\text{C}_{118}\text{H}_{178}\text{Mg}_2\text{N}_4\text{Na}_2$ : C 81.11 %, H 10.27 %, N 3.21 %; found: C 81.17 %, H 10.65 %, N 3.17 %.



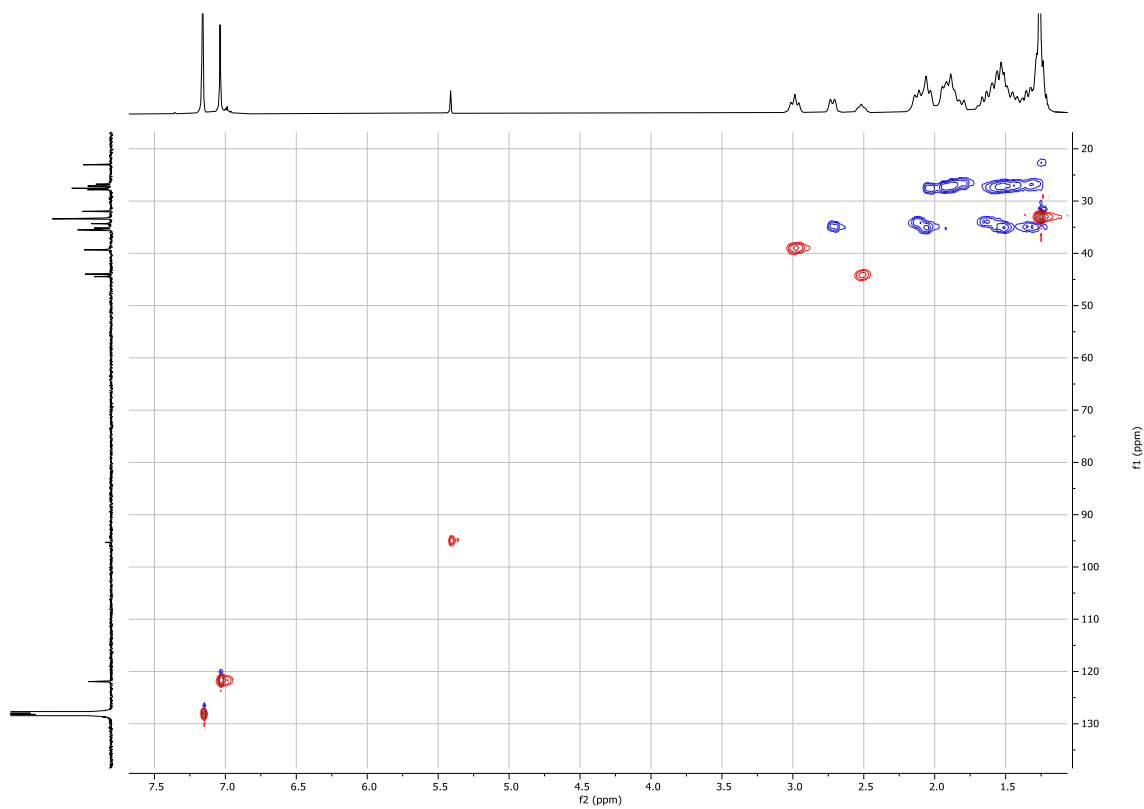

**Figure S77:** HSQC NMR spectrum (298 K, C<sub>6</sub>D<sub>6</sub>) of **6**.

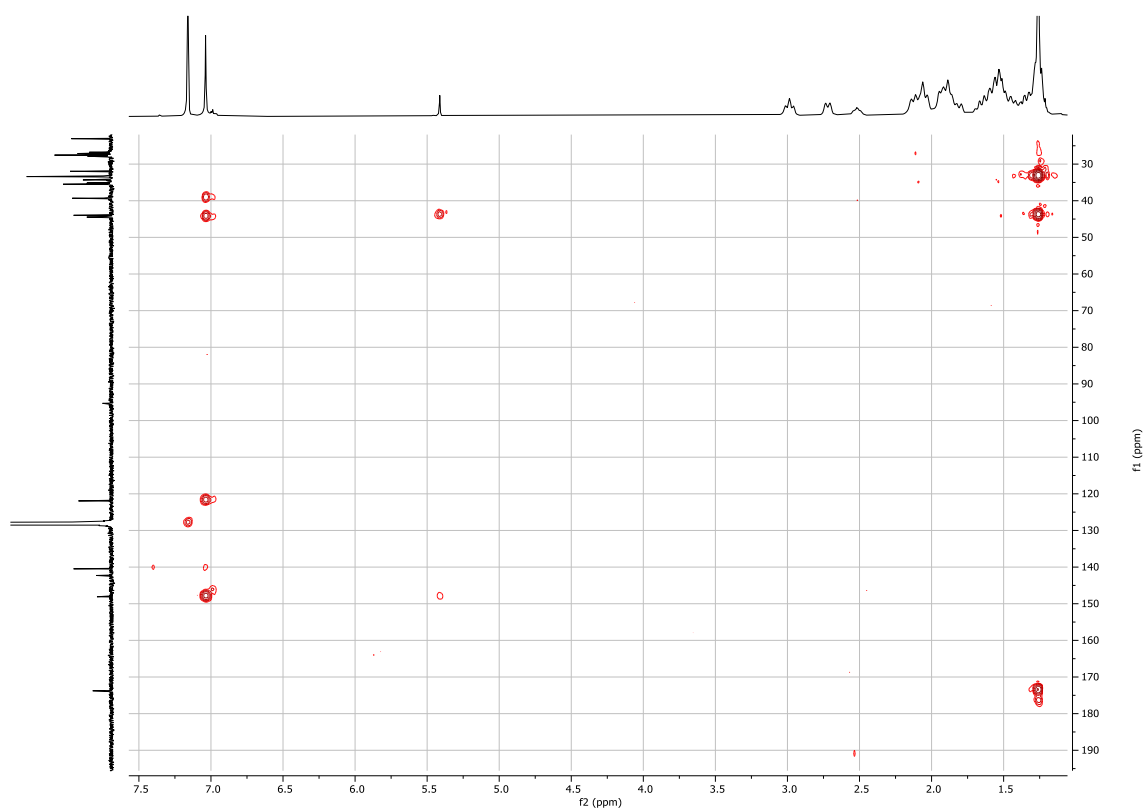

**Figure S78:** HMBC NMR spectrum (298 K, C<sub>6</sub>D<sub>6</sub>) of **6**.

## Preparation of $[\{(TCHP/DipNacnac)Mg\}_2Mg]$ 7

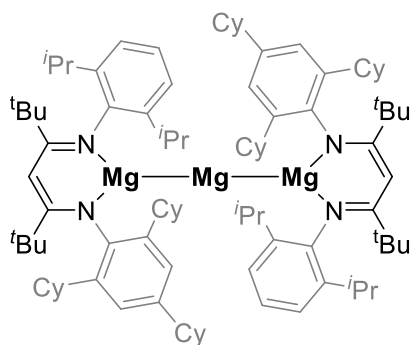

Compound **5** (250 mg, 0.31 mmol) and Na/NaCl (5% w/w, 1.025 g, 2.23 mmol) were charged to a 50 mL ampule and hexane (10 mL) was added. The reaction mixture was allowed to stir for 18 hours at room temperature. The volatiles were then removed *in vacuo*, the residue extracted with hexane (10 mL) and filtered to give a dark red solution. The filtrate was concentrated to *ca.* 2 mL and then stored at room temperature for several days resulting in the formation of red-brown crystals. **Yield:** 130 mg, 60 %.

**M.p.:** 138 – 140 °C (dec).

**$^1H$  NMR** (400 MHz,  $C_6D_6$ ):  $\delta$  1.21 (s, 18H,  $C(\underline{CH}_3)_3$ ), 1.22 (s, 18H,  $C(\underline{CH}_3)_3$ ), 1.31 (d,  $J = 6.8$  Hz, 12H,  $CH(\underline{CH}_3)_2$ ), 1.39 (d,  $J = 6.8$  Hz, 12H,  $CH(\underline{CH}_3)_2$ ), 1.45 – 2.18 (m, 60H,  $Cy-\underline{H}$ ), 2.52 – 2.63 (m, 2H,  $Cy-\underline{H}$ ), 2.70 – 2.83 (m, 4H,  $Cy-\underline{H}$ ), 3.15 (hept,  $J = 6.8$  Hz, 4H,  $\underline{CH}(\underline{CH}_3)_2$ ), 5.26 (s, 2H,  $NCC\underline{H}$ ), 6.95 – 7.03 (m, 6H,  $DippAr-\underline{H}$ ), 7.10 (s, 4H,  $TCHPAr-\underline{H}$ ).

**$^{13}C\{^1H\}$  NMR** (101 MHz,  $C_6D_6$ ):  $\delta$  23.8, 25.2 ( $CH(\underline{CH}_3)_2$ ), 26.8, 27.0, 27.4 ( $Cy-\underline{C}$ ), 27.6 ( $\underline{CH}(\underline{CH}_3)_2$ ), 28.0, 28.4, 29.4 ( $Cy-\underline{C}$ ), 33.1, 33.2 ( $C(\underline{CH}_3)_3$ ), 34.0, 35.3, 35.5, 39.7, 43.7 ( $Cy-\underline{C}$ ), 43.7 ( $\underline{C}(\underline{CH}_3)_3$ ), 44.9 ( $Cy-\underline{C}$ ), 94.7 ( $NCC\underline{H}$ ), 122.3, 123.0, 123.4, 124.6, 133.2, 139.6, 140.3, 141.2 ( $DippAr-\underline{C}$ ,  $TCHPAr-\underline{C}$ ), 174.2, 174.6 ( $N\underline{C}$ ).

**I.R.** (Nujol,  $cm^{-1}$ ): 1654 (w), 1609 (m), 1598 (m), 1056 (m), 1028 (m), 955 (m), 877 (m), 819 (m), 802 (m), 780 (m), 691 (m), 648 (m).

A reproducible microanalysis could not be obtained due to the extreme air and moisture sensitivity of the complex, and the inability to remove traces of  $TCHP/DipNacnacH$  after repeated recrystallizations.



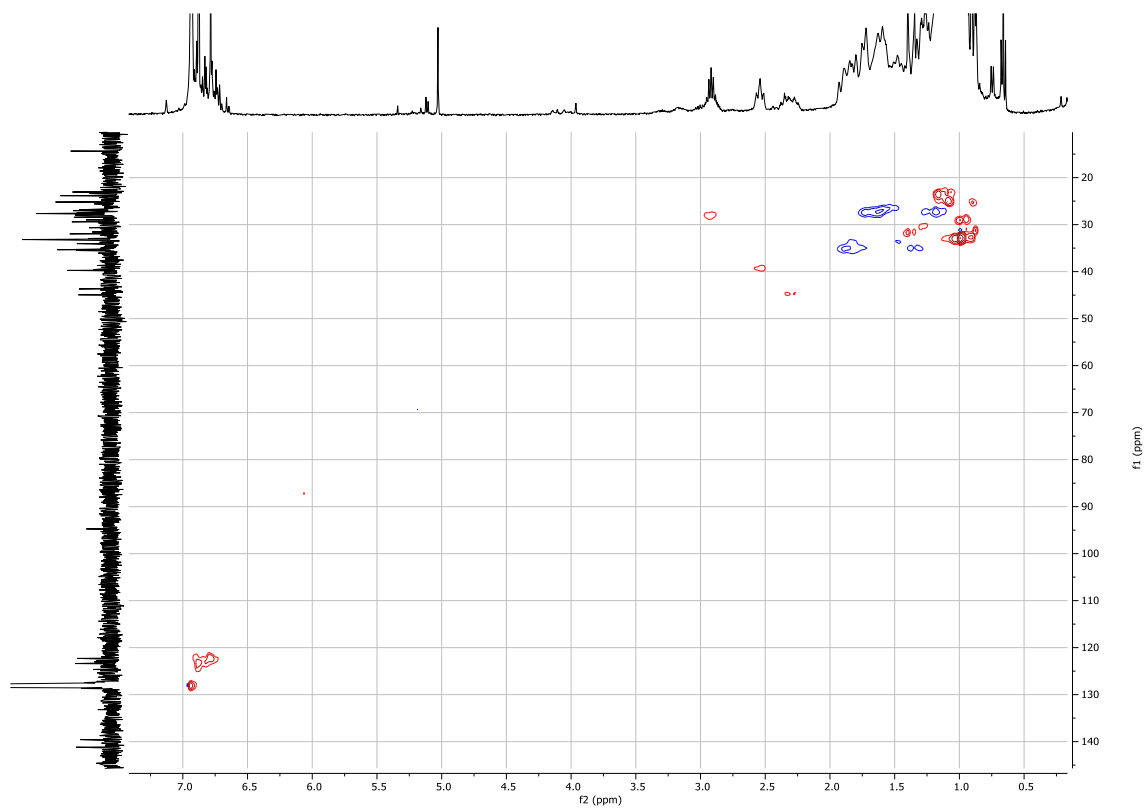

Figure S81: HSQC NMR spectrum (298 K, C<sub>6</sub>D<sub>6</sub>) of 7.

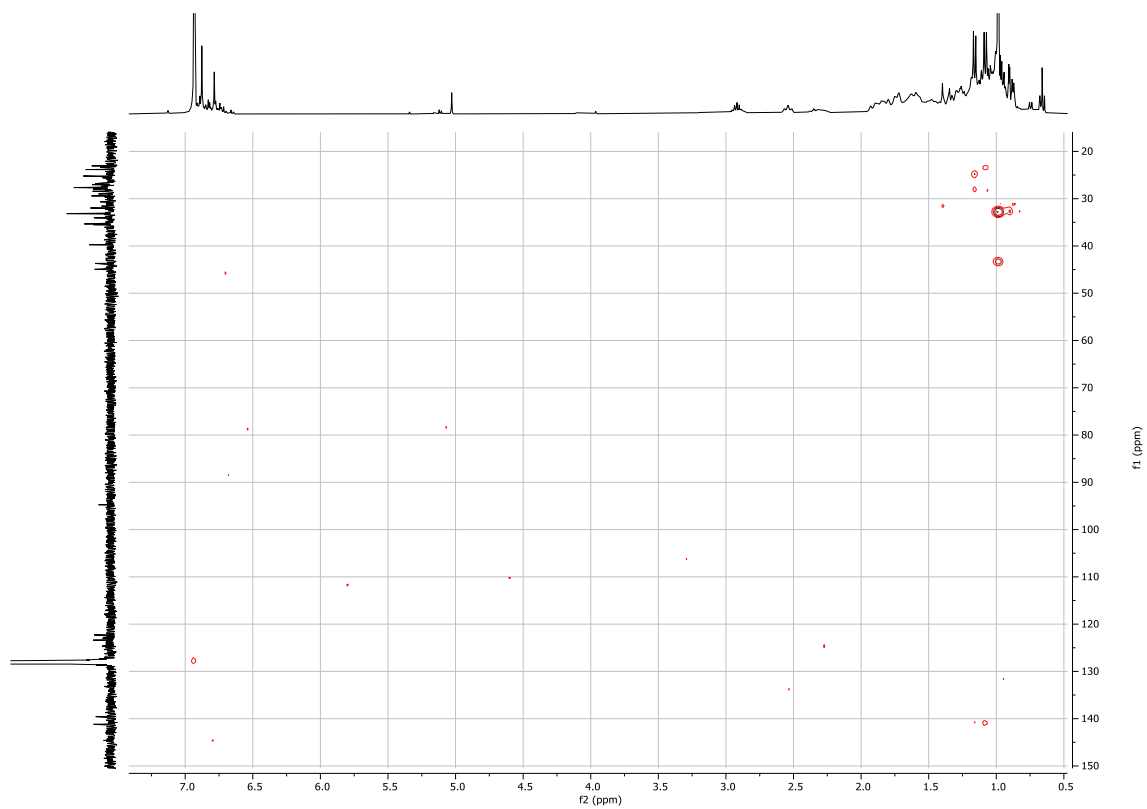

Figure S82: HMBC NMR spectrum (298 K, C<sub>6</sub>D<sub>6</sub>) of 7.

## Preparation of $[\{(TCHP)Nacnac\}Mg]_2Mg$ **8**

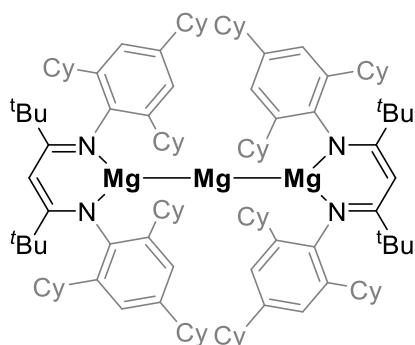

Compound **1** (2.00 g, 2.05 mmol),  $MgI_2$  (284 mg, 1.03 mmol) and Na/NaCl (5% w/w, 6.89 g, 14.98 mmol) were charged to a 50 mL ampule and methylcyclohexane (20 mL) was added. The reaction mixture was allowed to stir for 18 hours at room temperature. The volatiles were removed *in vacuo*, the residue extracted with hexane (50 mL), then filtered to give a dark red solution. The filtrate was concentrated to *ca.* 5 mL and stored at room temperature for 18 hours, resulting in the formation of dark red block-shaped crystals. **Yield:** 1.34 g, 76 %.

**M.p.:** 120–122 °C (dec).

**$^1H$  NMR** (400 MHz,  $C_6D_6$ ):  $\delta$  1.20 (s, 36H,  $C(\underline{CH}_3)_3$ ), 1.32 – 1.73 (m, 62H,  $Cy-\underline{H}$ ), 1.77 – 2.22 (m, 58H,  $Cy-\underline{H}$ ), 2.62 – 2.72 (m, 4H,  $Cy-\underline{H}$ ), 2.81 – 2.92 (m, 8H,  $Cy-\underline{H}$ ), 5.45 (s, 2H,  $NCC\underline{H}$ ), 7.06 (s, 8H,  $TCHPAr-\underline{H}$ ).

**$^{13}C\{^1H\}$  NMR** (101 MHz,  $C_6D_6$ ):  $\delta$  26.9, 27.0, 27.7, 27.8 ( $Cy-\underline{C}$ ), 33.2 ( $C(\underline{CH}_3)_3$ ), 34.3, 35.4, 35.7, 39.9 ( $Cy-\underline{C}$ ), 43.9 ( $\underline{C}(\underline{CH}_3)_3$ ), 44.7 ( $Cy-\underline{C}$ ), 95.8 ( $NCC\underline{H}$ ), 122.2, 140.0, 142.9, 144.7 ( $TCHPAr-\underline{C}$ ), 176.1 ( $\underline{NC}$ ).

**I.R.** (Nujol,  $cm^{-1}$ ): 1510 (m), 1025 (w), 997 (w), 862 (m), 787 (w), 708 (w), 658 (w).

**Anal. calcd.** for  $C_{118}H_{178}Mg_3N_4$ : C 82.14 %, H 10.40 %, N 3.25 %; found: C 81.54 %, H 11.15 %, N 2.78 %.

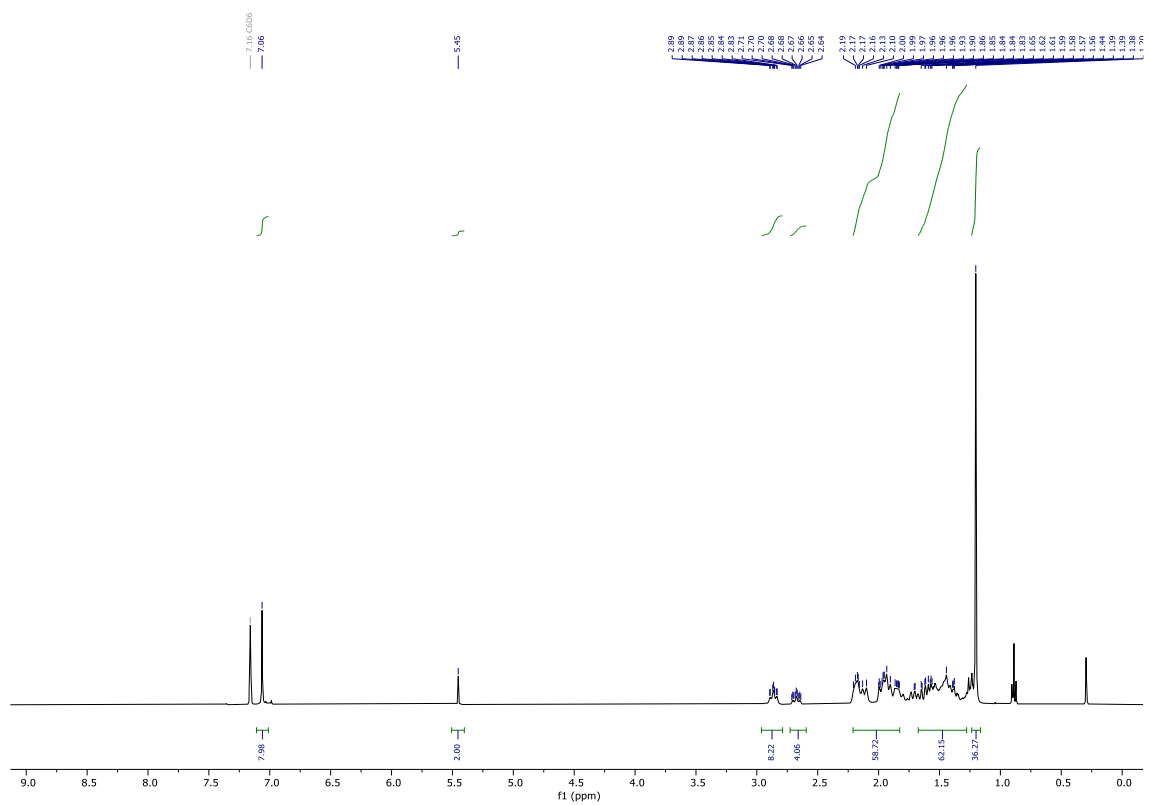

**Figure S83:**  $^1\text{H}$  NMR spectrum (400 MHz, 298 K,  $\text{C}_6\text{D}_6$ ) of **8**.

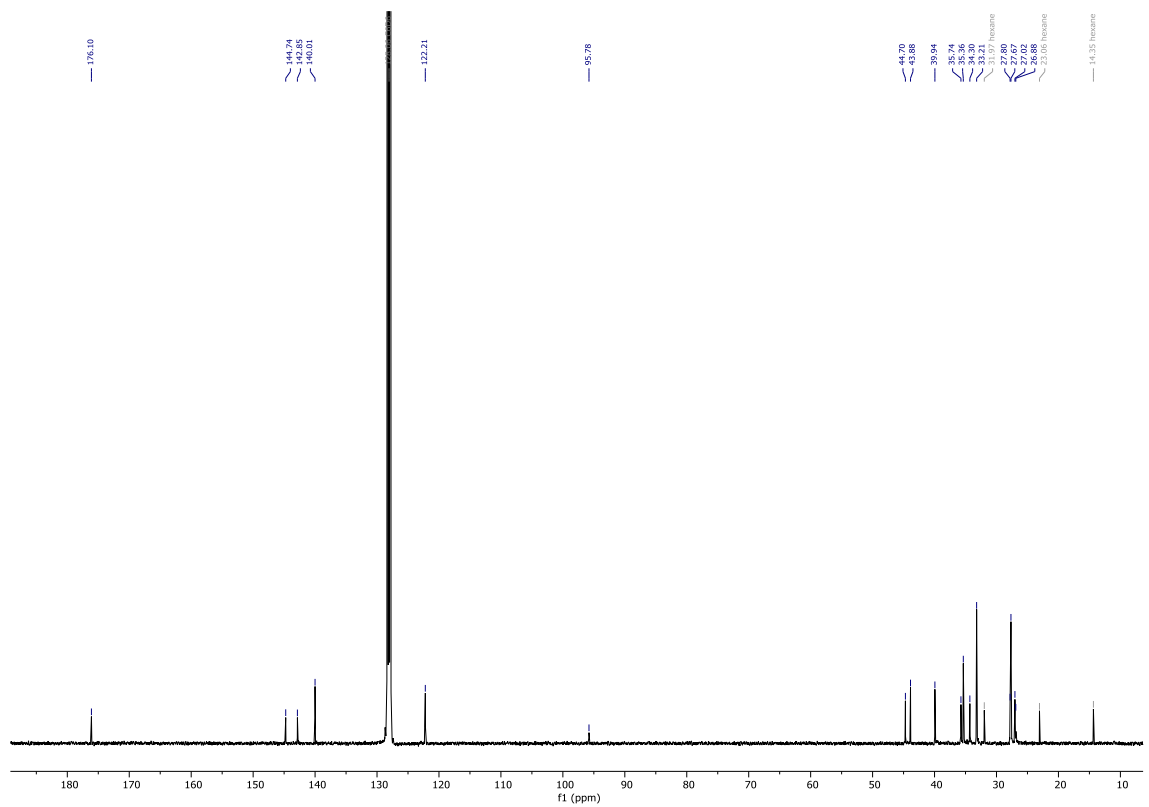

**Figure S84:**  $^{13}\text{C}\{^1\text{H}\}$  NMR spectrum (101 MHz, 298 K,  $\text{C}_6\text{D}_6$ ) of **8**.

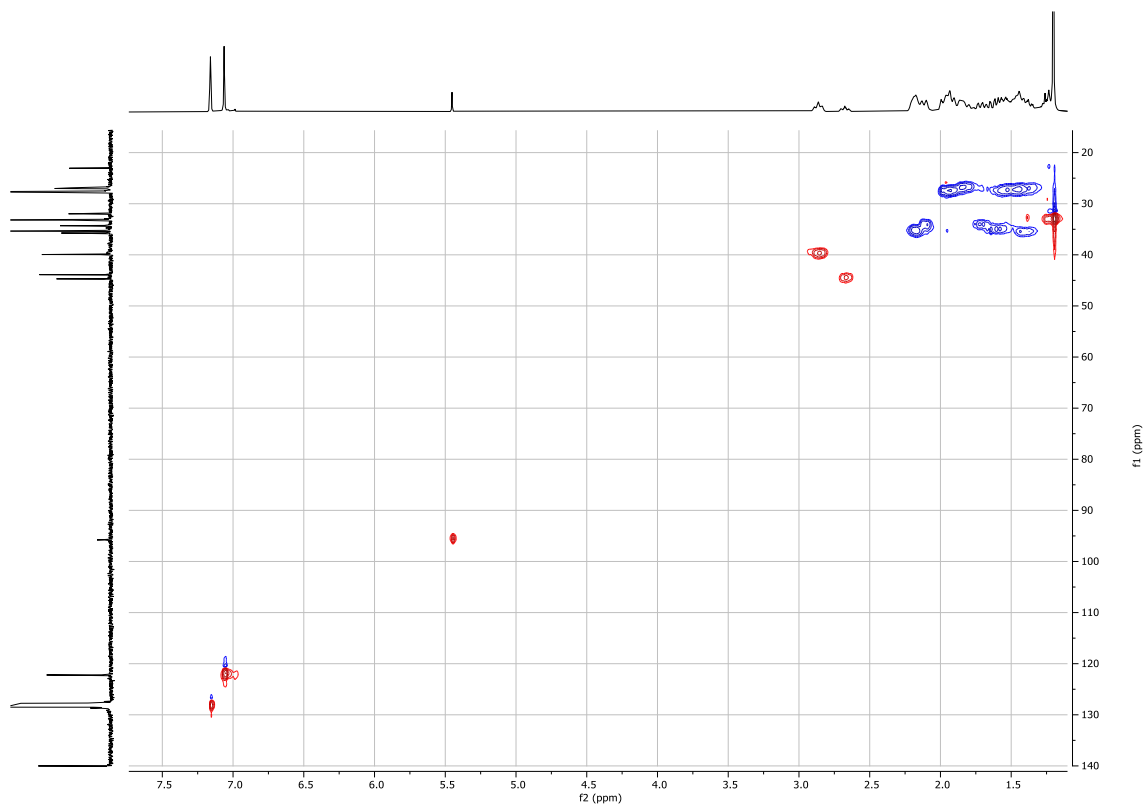

**Figure S85:** HSQC NMR spectrum (298 K, C<sub>6</sub>D<sub>6</sub>) of **8**.

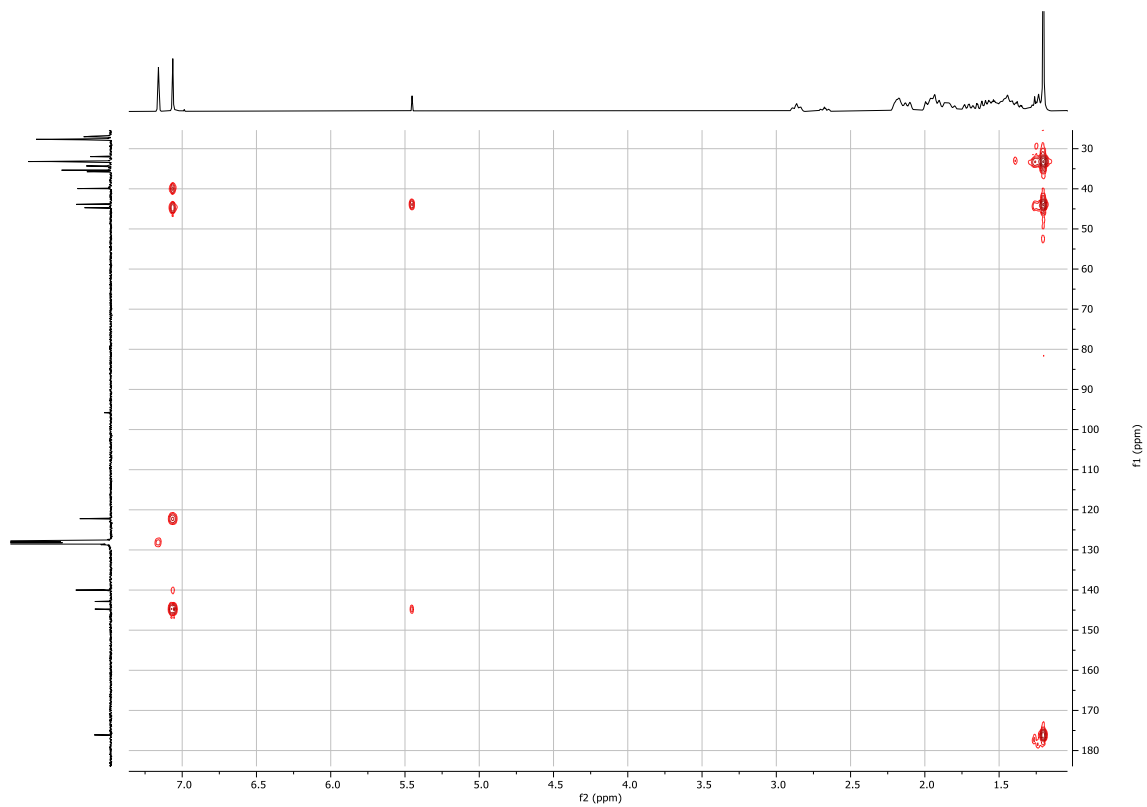

**Figure S86:** HMBC NMR spectrum (298 K, C<sub>6</sub>D<sub>6</sub>) of **8**.

## Preparation of $[\{(\text{tCHPNacnac})\text{Mg}\}_2\{\mu\text{-Cr}_2(\text{CO})_{10}\}] \mathbf{9}$

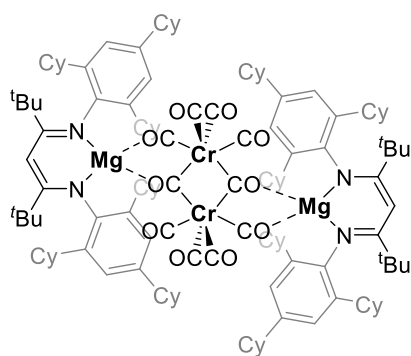

Compound **6** (300 mg, 0.17 mmol) and  $\text{Cr}(\text{CO})_6$  (75 mg, 0.34 mmol) were charged to a 50 mL ampule and benzene (10 mL) was added. The reaction mixture was stirred at room temperature for 18 hours. The volatiles were removed *in vacuo*, the residue extracted with hexane (10 mL), and filtered *via* cannula. The filtrate was concentrated (~1 mL) and allowed to sit at room temperature for 18 hours resulting in the deposition of red crystals. **Yield:** 75 mg, 21%.

*Note: The negligible solubility of the complex in both aliphatic and arene solvents, once crystallised, prevented the collection of meaningful NMR spectroscopic data. Attempts to dissolve the complex in ethereal solvents resulted in decomposition.*

**M.p.:** 126-128 °C (dec).

**I.R.** (Nujol,  $\text{cm}^{-1}$ ): 2000 (w), 1985 (w), 1955 (s), 1936 (s), 1851 (w), 1731 (s), 1661 (w), 1532 (w), 1500 (s), 1019 (m), 997 (m), 949 (w), 889 (w), 874 (w), 854 (m), 839 (w), 788 (m), 708 (w), 658 (s).

**Anal. calcd.** for  $\text{C}_{128}\text{H}_{178}\text{Mg}_2\text{Cr}_2\text{N}_4\text{O}_{10}$ : C 73.72 %, H 8.60%, N 2.69 %; found: C 73.50 %, H 9.10 %, N 2.37 %.

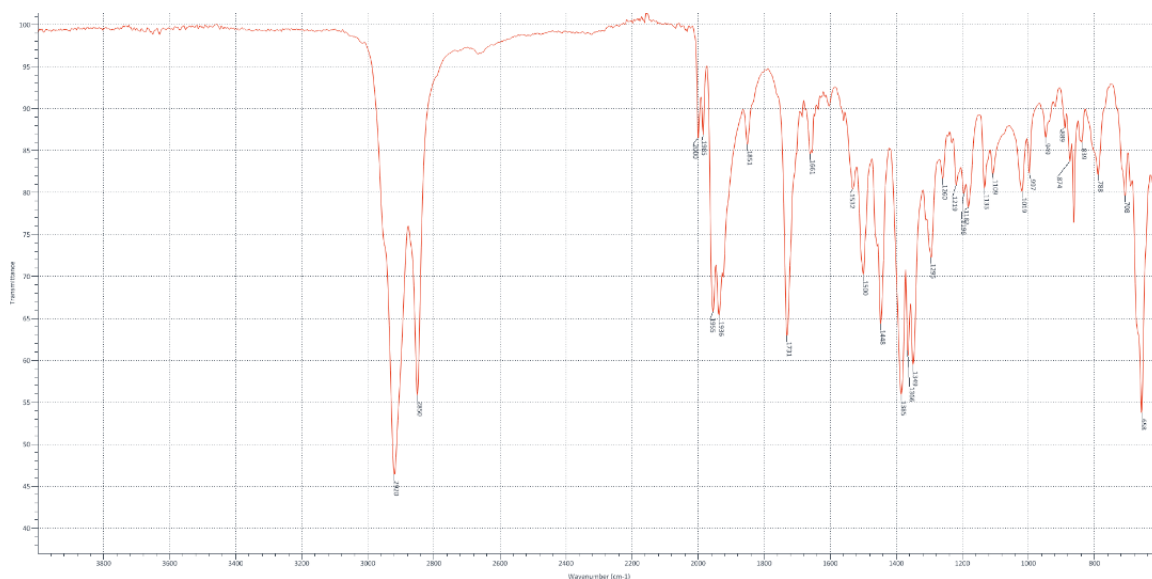

**Figure S87:** FTIR spectrum (Nujol mull) of **9**.

## Preparation of $\{[(^{\text{tCHP}}\text{Nacnac})\text{Mg}]_2\{\mu\text{-Mo}_2(\text{CO})_{10}\}\}$ **10**

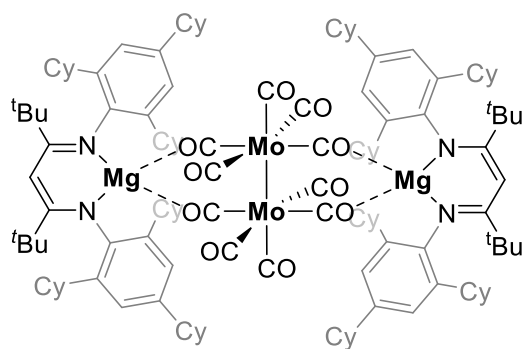

Compound **6** (300 mg, 0.17 mmol) and  $\text{Mo}(\text{CO})_6$  (90 mg, 0.34 mmol) were charged to a 50 mL ampule and benzene (10 mL) was added. The reaction mixture was stirred at room temperature for 18 hours. The volatiles were removed *in vacuo*, the residue extracted with hexane (10 mL), and filtered *via* cannula. The filtrate was concentrated (~1 mL) and allowed to sit at room temperature for 18 hours resulting in the formation of red crystals. **Yield:** 50 mg, 13%.

*Note: The negligible solubility of the complex in both aliphatic and arene solvents, once crystallised, prevented the collection of meaningful NMR spectroscopic data. Attempts to dissolve the complex in ethereal solvents resulted in decomposition.*

**M.p.:** 134–136 °C (dec).

**I.R.** (Nujol,  $\text{cm}^{-1}$ ): 1983 (s), 1931 (s), 1892 (s), 1702 (w), 1608 (w), 1073 (w), 1019 (w), 999 (w), 926 (m), 861 (s), 807 (w), 790 (m), 706 (w).

**Anal. Calcd.** for  $\text{C}_{128}\text{H}_{178}\text{Mg}_2\text{Mo}_2\text{N}_4\text{O}_{10}$ : C 70.74 %, H 8.26%, N 2.58 %; found: C 69.30 %, H 8.54 %, N 2.57 %.

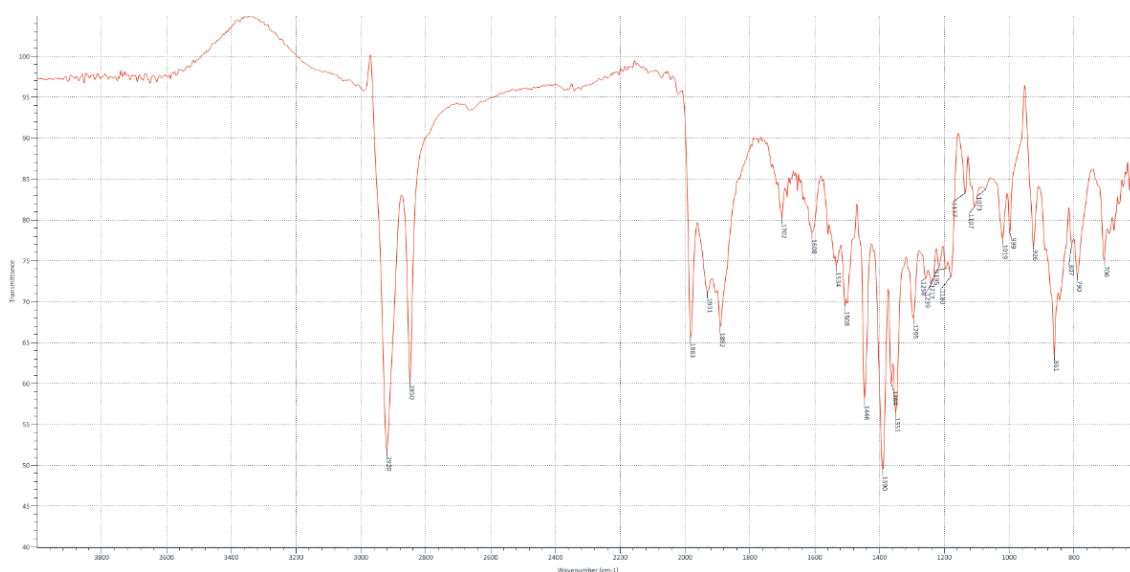

**Figure S88:** FTIR spectrum (Nujol mull) of **10**.

## Preparation of $[\{(\text{tCHP}^{\text{Nacnac}}\text{Mg})_2\{\mu\text{-Mn}_2(\text{CO})_8\}]$ 11

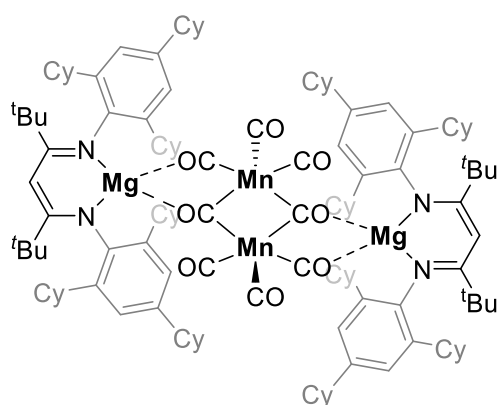

### Method A:

Compound **6** (300 mg, 0.17 mmol) and  $\text{Mn}(\text{CO})_5\text{Br}$  (94 mg, 0.34 mmol) were charged to a 50 mL ampule and benzene (10 mL) was added. The reaction mixture was stirred at room temperature for 18 hours. The volatiles were removed *in vacuo*, the residue extracted with hexane (10 mL), and filtered *via* cannula. The filtrate was concentrated (~1 mL) and allowed to sit at room temperature for 18 hours, resulting in the formation of brown crystals. **Yield:** 50 mg, 14%.

### Method B:

Compound **6** (300 mg, 0.17 mmol) and  $\text{Mn}_2(\text{CO})_{10}$  (66 mg, 0.17 mmol) were charged to a 50 mL ampule and benzene (10 mL) was added. The reaction mixture was stirred at room temperature for 18 hours. The volatiles were removed *in vacuo*, the residue extracted with hexane (10 mL), and filtered *via* cannula. The filtrate was concentrated (~1 mL) and allowed to sit at room temperature for 18 hours, resulting in the formation of brown crystals. **Yield:** 78 mg, 22%.

*Note: The negligible solubility of the complex in both aliphatic and arene solvents, once crystallised, prevented the collection of meaningful NMR spectroscopic data. Attempts to dissolve the complex in ethereal solvents resulted in decomposition.*

**M.p.:** 181–182 °C (dec).

**I.R.** (Nujol,  $\text{cm}^{-1}$ ): 1981 (s), 1929 (s), 1729 (m), 1608 (m), 1019 (m), 997 (w), 950 (w), 889 (w), 861 (m), 792 (w), 662 (s).

**Anal. calcd.** for  $\text{C}_{126}\text{H}_{178}\text{Mg}_2\text{Mn}_2\text{N}_4\text{O}_8$ : C 74.36 %, H 8.82 %, N 2.75 %; found: C 74.23 %, H 9.22 %, N 2.39 %.

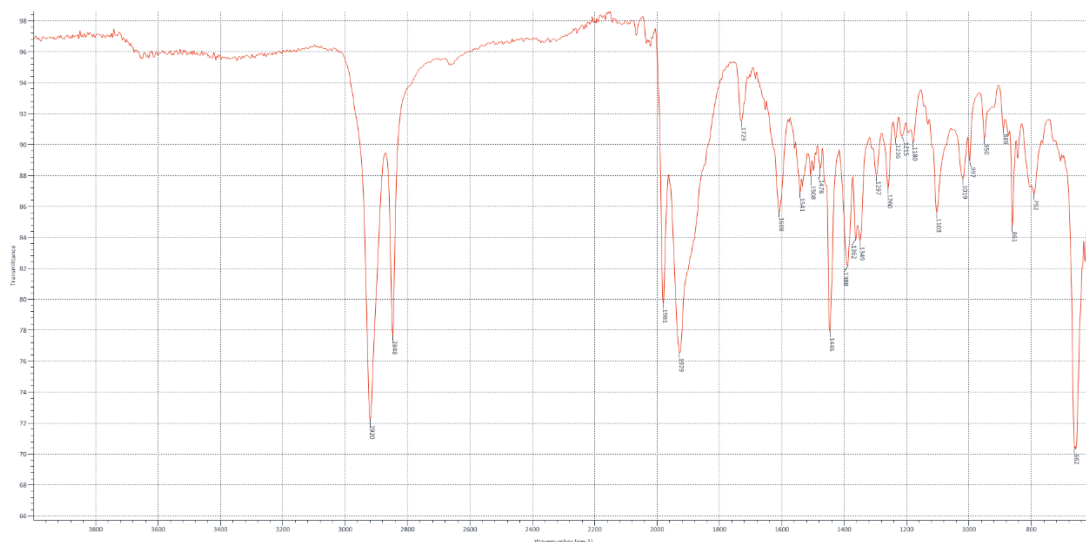

**Figure S89:** FTIR spectrum (Nujol mull) of **11**.

### Preparation of $[\{({}^{\text{TCHP}}\text{Nacnac})\text{Mg}\}\text{Na}\{\text{Fe}(\text{CO})_4\}]_2$ **12**

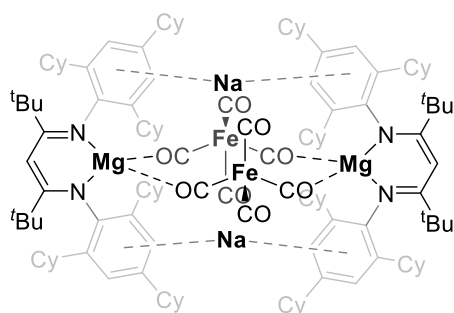

Compound **6** (300 mg, 0.17 mmol) and  $\text{Fe}(\text{CO})_5$  (67 mg, 46  $\mu\text{L}$ , 0.34 mmol) were charged to a 50 mL ampule and benzene (10 mL) was added. The reaction mixture was stirred at room temperature for 18 hours. The volatiles were removed *in vacuo*, the residue extracted with hexane (10 mL), and filtered *via* cannula. The filtrate was concentrated ( $\sim 1$  mL) and allowed to sit at room temperature for 18 hours, resulting in the formation of yellow crystals. **Yield:** 120 mg, 34%.

*Note: The negligible solubility of the complex in both aliphatic and arene solvents, once crystallised, prevented the collection of meaningful NMR spectroscopic data. Attempts to dissolve the complex in ethereal solvents resulted in decomposition.*

**M.p.:** 144–147 °C (dec).

**I.R.** (Nujol,  $\text{cm}^{-1}$ ): 2018 (m), 1992 (m), 1934 (m), 1784 (w), 1608 (m), 1103 (m), 1019 (m), 999 (w), 949 (w), 919 (w), 891 (w), 861 (m), 792 (m), 706 (w), 690 (w), 641 (w), 611 (w).

**Anal. calcd.** for  $\text{C}_{126}\text{H}_{178}\text{Mg}_2\text{Fe}_2\text{N}_4\text{O}_8\text{Na}_2$ : C 72.65 %, H 8.61 %, N 2.69 %; found: C 71.29 %, H 8.89 %, N 2.40 %.

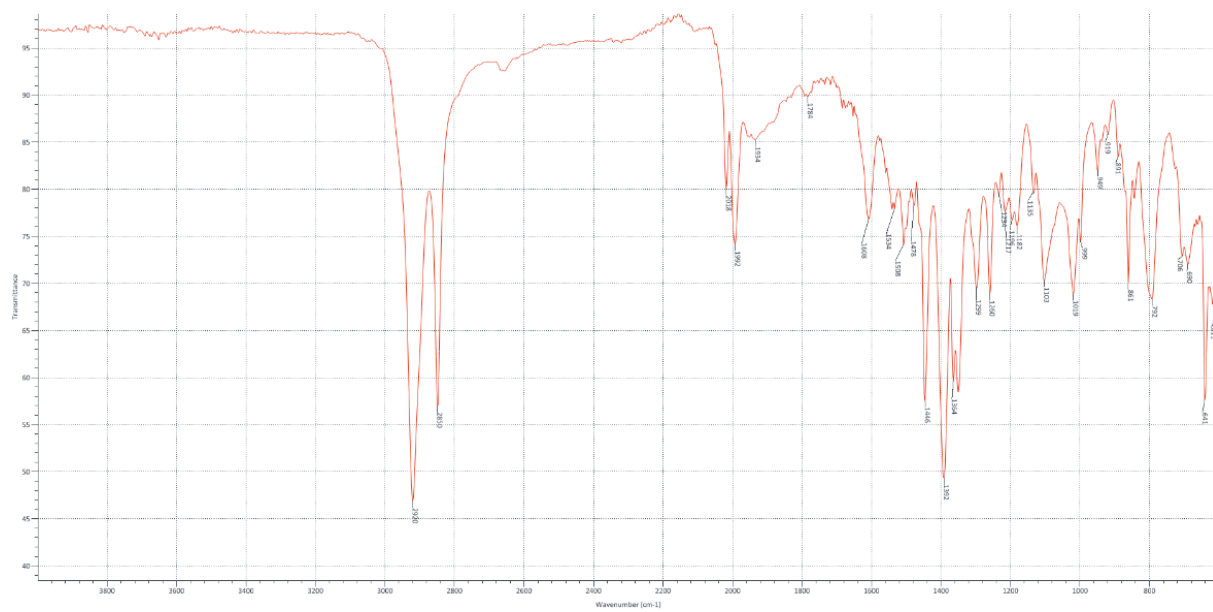

**Figure S90:** FTIR spectrum (Nujol mull) of **12**.

## 2. X-ray Crystallography

Crystals suitable for X-ray structural determination were mounted in silicone oil. Crystallographic measurements were made using a Rigaku Xtalab Synergy Dualflex using a graphite monochromator with Cu K $\alpha$  (1.54180 Å) or Mo K $\alpha$  (0.71073 Å) radiation, or the MX1/MX2 beamlines of the Australian Synchrotron ( $\lambda = 0.71090$  Å).<sup>[S5],[S6]</sup> The software package Blu-Ice<sup>[S7]</sup> was used for synchrotron data acquisition, while the program XDS<sup>[S8]</sup> was employed for synchrotron data reduction. All structures were solved by direct methods and refined on F<sup>2</sup> by full matrix least squares (SHELX-18)<sup>[S9]</sup> using all unique data. Hydrogen atoms were included in calculated positions (riding model). Crystal data, details of data collections, and refinements for all structures can be found in their CIF files and are summarized in Table S1.

**Table S1:** Crystallographic Data for Isolated Compounds

| Compound                                | (TCHP)NC(Cl)Bu'                                   |                  | (TCHP)NC(Me)Bu'                                   |               | DCHP <sup>n</sup> NacnacH                         |                   |
|-----------------------------------------|---------------------------------------------------|------------------|---------------------------------------------------|---------------|---------------------------------------------------|-------------------|
| <b>Empirical formula</b>                | C <sub>29</sub> H <sub>44</sub> Cl N              |                  | C <sub>30</sub> H <sub>47</sub> N                 |               | C <sub>47</sub> H <sub>70</sub> N <sub>2</sub>    |                   |
| <b>Formula weight</b>                   | 442.1                                             |                  | 421.68                                            |               | 663.05                                            |                   |
| <b>Temperature</b>                      | 123.0(2) K                                        |                  | 100(2) K                                          |               | 123.0(1) K                                        |                   |
| <b>Crystal system</b>                   | Monoclinic                                        |                  | Monoclinic                                        |               | Monoclinic                                        |                   |
| <b>Space group</b>                      | <i>P2<sub>1</sub>/c</i>                           |                  | <i>P2<sub>1</sub>/n</i>                           |               | <i>P2<sub>1</sub>/c</i>                           |                   |
| <b>Unit cell dimensions</b>             | a = 10.64740(10) Å                                | α = 90°          | a = 6.2000(12) Å                                  | α = 90°       | a = 20.1744(2) Å                                  | α = 90°           |
|                                         | b = 11.33190(10) Å                                | β = 93.0700(10)° | b = 16.190(3) Å                                   | β = 91.56(3)° | b = 10.27740(10) Å                                | β = 113.8260(10)° |
|                                         | c = 21.9748(3) Å                                  | γ = 90°          | c = 26.470(5) Å                                   | γ = 90°       | c = 21.3777(2) Å                                  | γ = 90°           |
| <b>Volume</b>                           | 2647.57(5) Å <sup>3</sup>                         |                  | 2656.0(9) Å <sup>3</sup>                          |               | 4054.71(7) Å <sup>3</sup>                         |                   |
| <b>Z</b>                                | 4                                                 |                  | 4                                                 |               | 4                                                 |                   |
| <b>Density (calculated)</b>             | 1.109 Mg/m <sup>3</sup>                           |                  | 1.055 Mg/m <sup>3</sup>                           |               | 1.086 Mg/m <sup>3</sup>                           |                   |
| <b>Absorption coefficient</b>           | 1.367 mm <sup>-1</sup>                            |                  | 0.059 mm <sup>-1</sup>                            |               | 0.455 mm <sup>-1</sup>                            |                   |
| <b>F(000)</b>                           | 968                                               |                  | 936                                               |               | 1464                                              |                   |
| <b>Crystal size</b>                     | 0.240 x 0.130 x 0.080 mm <sup>3</sup>             |                  | 0.120 x 0.080 x 0.060 mm <sup>3</sup>             |               | 0.650 x 0.410 x 0.290 mm <sup>3</sup>             |                   |
| <b>Theta range for data collection</b>  | 4.029 to 79.743°                                  |                  | 1.475 to 26.370°                                  |               | 4.175 to 79.937°                                  |                   |
| <b>Index ranges</b>                     | -13 ≤ h ≤ 12, -14 ≤ k ≤ 14, -17 ≤ l ≤ 27          |                  | -7 ≤ h ≤ 7, -20 ≤ k ≤ 19, -33 ≤ l ≤ 33            |               | -23 ≤ h ≤ 25, -8 ≤ k ≤ 12, -26 ≤ l ≤ 27           |                   |
| <b>Reflections collected</b>            | 22636                                             |                  | 62956                                             |               | 35972                                             |                   |
| <b>Independent reflections</b>          | 5653 [R(int) = 0.0291]                            |                  | 5385 [R(int) = 0.0445]                            |               | 8644 [R(int) = 0.0236]                            |                   |
| <b>Completeness to theta = 67.684°</b>  | 100.00%                                           |                  | 99.90%                                            |               | 99.90%                                            |                   |
| <b>Absorption correction</b>            | Gaussian                                          |                  | Semi-empirical from equivalents                   |               | Gaussian                                          |                   |
| <b>Max. and min. transmission</b>       | 0.745 and 0.183                                   |                  | Value not reported by XDS                         |               | 1.000 and 0.135                                   |                   |
| <b>Data / restraints / parameters</b>   | 5653 / 0 / 283                                    |                  | 5385 / 0 / 285                                    |               | 8644 / 0 / 448                                    |                   |
| <b>Goodness-of-fit on F<sup>2</sup></b> | 1.056                                             |                  | 1.073                                             |               | 1.027                                             |                   |
| <b>Final R indices [I &gt; 2σ(I)]</b>   | R <sub>1</sub> = 0.0411, wR <sub>2</sub> = 0.1106 |                  | R <sub>1</sub> = 0.0387, wR <sub>2</sub> = 0.0988 |               | R <sub>1</sub> = 0.0447, wR <sub>2</sub> = 0.1191 |                   |
| <b>R indices (all data)</b>             | R <sub>1</sub> = 0.0432, wR <sub>2</sub> = 0.1124 |                  | R <sub>1</sub> = 0.0446, wR <sub>2</sub> = 0.1045 |               | R <sub>1</sub> = 0.0474, wR <sub>2</sub> = 0.1216 |                   |
| <b>Largest diff. peak and hole</b>      | 0.486 and -0.251 e.Å <sup>-3</sup>                |                  | 0.228 and -0.177 e.Å <sup>-3</sup>                |               | 0.309 and -0.221 e.Å <sup>-3</sup>                |                   |
| <b>CCDC Number</b>                      | 2534925                                           |                  | 2534941                                           |               | 2534934                                           |                   |

**Table S1 (contd.): Crystallographic Data for Isolated Compounds**

| Compound                                | TCHP <b>Nacnac</b> H                              |               | TCHP/Dip <b>Nacnac</b> H                          |                | (D <b>CHP</b> Nacnac)Li(OEt) <sub>2</sub>           |                  |
|-----------------------------------------|---------------------------------------------------|---------------|---------------------------------------------------|----------------|-----------------------------------------------------|------------------|
| <b>Empirical formula</b>                | C <sub>59</sub> H <sub>90</sub> N <sub>2</sub>    |               | C <sub>47</sub> H <sub>70</sub> N <sub>2</sub>    |                | C <sub>51</sub> H <sub>79</sub> Li N <sub>2</sub> O |                  |
| <b>Formula weight</b>                   | 827.32                                            |               | 663.05                                            |                | 743.1                                               |                  |
| <b>Temperature</b>                      | 100(2) K                                          |               | 100(2) K                                          |                | 122.97(12) K                                        |                  |
| <b>Crystal system</b>                   | Monoclinic                                        |               | Monoclinic                                        |                | Monoclinic                                          |                  |
| <b>Space group</b>                      | <i>P2<sub>1</sub>/c</i>                           |               | <i>P2<sub>1</sub>/c</i>                           |                | <i>C2/c</i>                                         |                  |
| <b>Unit cell dimensions</b>             | a = 21.780(4) Å                                   | α = 90°       | a = 20.1744(2) Å                                  | α = 90°        | a = 18.12080(10) Å                                  | α = 90°          |
|                                         | b = 24.420(5) Å                                   | β = 90.77(3)° | b = 10.2774(1) Å                                  | β = 113.826(1) | b = 15.59790(10) Å                                  | β = 94.2790(10)° |
|                                         | c = 9.7100(19) Å                                  | γ = 90°       | c = 21.3777(2) Å                                  | γ = 90°        | c = 16.06980(10) Å                                  | γ = 90°          |
| <b>Volume</b>                           | 5164.0(18) Å <sup>3</sup>                         |               | 4054.71(7) Å <sup>3</sup>                         |                | 4529.41(5) Å <sup>3</sup>                           |                  |
| <b>Z</b>                                | 4                                                 |               | 4                                                 |                | 4                                                   |                  |
| <b>Density (calculated)</b>             | 1.064 Mg/m <sup>3</sup>                           |               | 1.086 Mg/m <sup>3</sup>                           |                | 1.090 Mg/m <sup>3</sup>                             |                  |
| <b>Absorption coefficient</b>           | 0.060 mm <sup>-1</sup>                            |               | 0.455 mm <sup>-1</sup>                            |                | 0.467 mm <sup>-1</sup>                              |                  |
| <b>F(000)</b>                           | 1832                                              |               | 1464                                              |                | 1640                                                |                  |
| <b>Crystal size</b>                     | 0.120 x 0.110 x 0.040 mm <sup>3</sup>             |               | 0.650 x 0.410 x 0.290 mm <sup>3</sup>             |                | 0.280 x 0.190 x 0.150 mm <sup>3</sup>               |                  |
| <b>Theta range for data collection</b>  | 0.935 to 26.371°                                  |               | 4.175 to 79.937°                                  |                | 3.744 to 80.268°                                    |                  |
| <b>Index ranges</b>                     | -27<=h<=27, -30<=k<=30, -12<=l<=12                |               | -23<=h<=25, -8<=k<=12, -26<=l<=27                 |                | -23<=h<=20, -19<=k<=18, -20<=l<=19                  |                  |
| <b>Reflections collected</b>            | 121840                                            |               | 35972                                             |                | 47235                                               |                  |
| <b>Independent reflections</b>          | 10480 [R(int) = 0.0495]                           |               | 8644 [R(int) = 0.0236]                            |                | 4921 [R(int) = 0.0300]                              |                  |
| <b>Completeness to theta = 67.684 °</b> | 99.40%                                            |               | 99.9%                                             |                | 100.00%                                             |                  |
| <b>Absorption correction</b>            | Semi-empirical from equivalents                   |               | Gaussian                                          |                | Gaussian                                            |                  |
| <b>Max. and min. transmission</b>       | Value not reported by XDS                         |               | 1.000 and 0.543                                   |                | 1.000 and 0.416                                     |                  |
| <b>Data / restraints / parameters</b>   | 10480 / 0 / 556                                   |               | 8644 / 0 / 448                                    |                | 4921 / 0 / 256                                      |                  |
| <b>Goodness-of-fit on F<sup>2</sup></b> | 1.069                                             |               | 1.027                                             |                | 1.068                                               |                  |
| <b>Final R indices [I &gt; 2σ(I)]</b>   | R <sub>1</sub> = 0.0721, wR <sub>2</sub> = 0.2157 |               | R <sub>1</sub> = 0.0447, wR <sub>2</sub> = 0.1191 |                | R <sub>1</sub> = 0.0368, wR <sub>2</sub> = 0.0945   |                  |
| <b>R indices (all data)</b>             | R <sub>1</sub> = 0.0841, wR <sub>2</sub> = 0.2282 |               | R <sub>1</sub> = 0.0474, wR <sub>2</sub> = 0.1216 |                | R <sub>1</sub> = 0.0390, wR <sub>2</sub> = 0.0962   |                  |
| <b>Largest diff. peak and hole</b>      | 0.526 and -0.415 e.Å <sup>-3</sup>                |               | 0.309 and -0.221 e.Å <sup>-3</sup>                |                | 0.283 and -0.181 e.Å <sup>-3</sup>                  |                  |
| <b>CCDC Number</b>                      | 2534939                                           |               | 2534934                                           |                | 2534927                                             |                  |

**Table S1 (contd.):** Crystallographic Data for Isolated Compounds

| Compound                          | 1                                                   |          | 2                                                      |                   | 3/3-Me                                                                 |                |
|-----------------------------------|-----------------------------------------------------|----------|--------------------------------------------------------|-------------------|------------------------------------------------------------------------|----------------|
| Empirical formula                 | C <sub>59</sub> H <sub>89</sub> I Mg N <sub>2</sub> |          | C <sub>65.5</sub> H <sub>105</sub> Li N <sub>2</sub> O |                   | C <sub>47.5</sub> H <sub>70.5</sub> I <sub>0.5</sub> Mg N <sub>2</sub> |                |
| Formula weight                    | 977.53                                              |          | 943.45                                                 |                   | 757.31                                                                 |                |
| Temperature                       | 100(2) K                                            |          | 123.0(1) K                                             |                   | 123.0(1) K                                                             |                |
| Crystal system                    | Trigonal                                            |          | Monoclinic                                             |                   | Monoclinic                                                             |                |
| Space group                       | P <sub>3</sub> 2 <sub>1</sub>                       |          | P <sub>2</sub> <sub>1</sub> /c                         |                   | P <sub>2</sub> <sub>1</sub> /n                                         |                |
| Unit cell dimensions              | a = 10.9500(15) Å                                   | α = 90°  | a = 19.46810(10) Å                                     | α = 90°           | a = 10.1795(2) Å                                                       | α = 90°        |
|                                   | b = 10.9500(15) Å                                   | β = 90°  | b = 15.83380(10) Å                                     | β = 105.7560(10)° | b = 23.0996(4) Å                                                       | β = 99.324(2)° |
|                                   | c = 39.160(8) Å                                     | γ = 120° | c = 20.11950(10) Å                                     | γ = 90°           | c = 18.9134(3) Å                                                       | γ = 90°        |
| Volume                            | 4066.3(14) Å <sup>3</sup>                           |          | 5968.89(6) Å <sup>3</sup>                              |                   | 4388.58(14) Å <sup>3</sup>                                             |                |
| Z                                 | 3                                                   |          | 4                                                      |                   | 4                                                                      |                |
| Density (calculated)              | 1.198 Mg/m <sup>3</sup>                             |          | 1.050 Mg/m <sup>3</sup>                                |                   | 1.146 Mg/m <sup>3</sup>                                                |                |
| Absorption coefficient            | 0.640 mm <sup>-1</sup>                              |          | 0.443 mm <sup>-1</sup>                                 |                   | 3.338 mm <sup>-1</sup>                                                 |                |
| F(000)                            | 1566                                                |          | 2092                                                   |                   | 1632                                                                   |                |
| Crystal size                      | 0.210 x 0.130 x 0.040 mm <sup>3</sup>               |          | 0.440 x 0.220 x 0.090 mm <sup>3</sup>                  |                   | 0.180 x 0.150 x 0.060 mm <sup>3</sup>                                  |                |
| Theta range for data collection   | 1.560 to 26.371°                                    |          | 3.606 to 80.403°                                       |                   | 3.827 to 80.854°                                                       |                |
| Index ranges                      | -13<=h<=13, -13<=k<=13, -48<=l<=48                  |          | -24<=h<=24, -20<=k<=20, -25<=l<=21                     |                   | -12<=h<=12, -29<=k<=20, -23<=l<=23                                     |                |
| Reflections collected             | 103219                                              |          | 125181                                                 |                   | 47139                                                                  |                |
| Independent reflections           | 5576 [R(int) = 0.0315]                              |          | 12940 [R(int) = 0.0363]                                |                   | 9414 [R(int) = 0.0540]                                                 |                |
| Completeness to theta = 67.684 °  | 100.00%                                             |          | 99.80%                                                 |                   | 100.00%                                                                |                |
| Absorption correction             | Semi-empirical from equivalents                     |          | Gaussian                                               |                   | Gaussian                                                               |                |
| Max. and min. transmission        | Value not reported by XDS                           |          | 1.000 and 0.343                                        |                   | 0.771 and 0.140                                                        |                |
| Data / restraints / parameters    | 5576 / 0 / 291                                      |          | 12940 / 164 / 710                                      |                   | 9414 / 7 / 476                                                         |                |
| Goodness-of-fit on F <sup>2</sup> | 1.076                                               |          | 1.066                                                  |                   | 1.051                                                                  |                |
| Final R indices [I > 2sigma(I)]   | R <sub>1</sub> = 0.0223, wR <sub>2</sub> = 0.0642   |          | R <sub>1</sub> = 0.0475, wR <sub>2</sub> = 0.1297      |                   | R <sub>1</sub> = 0.0450, wR <sub>2</sub> = 0.1170                      |                |
| R indices (all data)              | R <sub>1</sub> = 0.0224, wR <sub>2</sub> = 0.0643   |          | R <sub>1</sub> = 0.0518, wR <sub>2</sub> = 0.1343      |                   | R <sub>1</sub> = 0.0570, wR <sub>2</sub> = 0.1268                      |                |
| Largest diff. peak and hole       | 0.308 and -0.357 e.Å <sup>-3</sup>                  |          | 0.676 and -0.393 e.Å <sup>-3</sup>                     |                   | 0.453 and -0.467 e.Å <sup>-3</sup>                                     |                |
| CCDC Number                       | 2534940                                             |          | 2534936                                                |                   | 2534926                                                                |                |

**Table S1 (contd.):** Crystallographic Data for Isolated Compounds

| Compound                                | 5                                                             |                 | 6                                                                                |               | 7                                                               |               |
|-----------------------------------------|---------------------------------------------------------------|-----------------|----------------------------------------------------------------------------------|---------------|-----------------------------------------------------------------|---------------|
| <b>Empirical formula</b>                | C <sub>50</sub> H <sub>74</sub> I Mg N <sub>2</sub>           |                 | C <sub>124</sub> H <sub>184</sub> Mg <sub>2</sub> N <sub>4</sub> Na <sub>2</sub> |               | C <sub>94</sub> H <sub>142</sub> Mg <sub>3</sub> N <sub>4</sub> |               |
| <b>Formula weight</b>                   | 854.32                                                        |                 | 1825.34                                                                          |               | 1401.04                                                         |               |
| <b>Temperature</b>                      | 123.0(1) K                                                    |                 | 100(2) K                                                                         |               | 100(2) K                                                        |               |
| <b>Crystal system</b>                   | Triclinic                                                     |                 | Triclinic                                                                        |               | Monoclinic                                                      |               |
| <b>Space group</b>                      | <i>P</i> -1                                                   |                 | <i>P</i> -1                                                                      |               | <i>P</i> 2 <sub>1</sub> / <i>n</i>                              |               |
| <b>Unit cell dimensions</b>             | a = 12.7396(3) Å                                              | α = 92.684(2)°  | a = 15.708(3) Å                                                                  | α = 86.06(3)° | a = 10.960(2) Å                                                 | α = 90°       |
|                                         | b = 14.1682(3) Å                                              | β = 107.429(2)° | b = 16.044(3) Å                                                                  | β = 86.00(3)° | b = 19.800(4) Å                                                 | β = 93.46(3)° |
|                                         | c = 14.5489(4) Å                                              | γ = 109.246(2)° | c = 22.901(5) Å                                                                  | γ = 76.73(3)° | c = 20.060(4) Å                                                 | γ = 90°       |
| <b>Volume</b>                           | 2334.36(10) Å <sup>3</sup>                                    |                 | 5596(2) Å <sup>3</sup>                                                           |               | 4345.2(15) Å <sup>3</sup>                                       |               |
| <b>Z</b>                                | 2                                                             |                 | 2                                                                                |               | 2                                                               |               |
| <b>Density (calculated)</b>             | 1.215 Mg/m <sup>3</sup>                                       |                 | 1.083 Mg/m <sup>3</sup>                                                          |               | 1.071 Mg/m <sup>3</sup>                                         |               |
| <b>Absorption coefficient</b>           | 5.757 mm <sup>-1</sup>                                        |                 | 0.078 mm <sup>-1</sup>                                                           |               | 0.080 mm <sup>-1</sup>                                          |               |
| <b>F(000)</b>                           | 906                                                           |                 | 2004                                                                             |               | 1540                                                            |               |
| <b>Crystal size</b>                     | 0.310 x 0.210 x 0.170 mm <sup>3</sup>                         |                 | 0.120 x 0.100 x 0.040 mm <sup>3</sup>                                            |               | 0.080 x 0.050 x 0.020 mm <sup>3</sup>                           |               |
| <b>Theta range for data collection</b>  | 3.899 to 79.617°                                              |                 | 0.893 to 28.806°                                                                 |               | 1.446 to 26.371°                                                |               |
| <b>Index ranges</b>                     | -16<= <i>h</i> <=16, -18<= <i>k</i> <=16, -15<= <i>l</i> <=18 |                 | -20<= <i>h</i> <=21, -21<= <i>k</i> <=21, -30<= <i>l</i> <=30                    |               | -13<= <i>h</i> <=13, -24<= <i>k</i> <=24, -25<= <i>l</i> <=25   |               |
| <b>Reflections collected</b>            | 29075                                                         |                 | 68112                                                                            |               | 101682                                                          |               |
| <b>Independent reflections</b>          | 9690 [R(int) = 0.0541]                                        |                 | 19715 [R(int) = 0.0682]                                                          |               | 8690 [R(int) = 0.1530]                                          |               |
| <b>Completeness to theta = 67.684 °</b> | 99.10%                                                        |                 | 87.80%                                                                           |               | 98.10%                                                          |               |
| <b>Absorption correction</b>            | Semi-empirical from equivalents                               |                 | Semi-empirical from equivalents                                                  |               | Semi-empirical from equivalents                                 |               |
| <b>Max. and min. transmission</b>       | 1.00000 and 0.56875                                           |                 | Value not reported by XDS                                                        |               | Value not reported by XDS                                       |               |
| <b>Data / restraints / parameters</b>   | 9690 / 0 / 501                                                |                 | 19715 / 0 / 1201                                                                 |               | 8690 / 240 / 522                                                |               |
| <b>Goodness-of-fit on F<sup>2</sup></b> | 1.103                                                         |                 | 1.075                                                                            |               | 0.946                                                           |               |
| <b>Final R indices [I &gt; 2σ(I)]</b>   | R <sub>1</sub> = 0.0389, wR <sub>2</sub> = 0.1030             |                 | R <sub>1</sub> = 0.0916, wR <sub>2</sub> = 0.2593                                |               | R <sub>1</sub> = 0.0783, wR <sub>2</sub> = 0.2104               |               |
| <b>R indices (all data)</b>             | R <sub>1</sub> = 0.0424, wR <sub>2</sub> = 0.1050             |                 | R <sub>1</sub> = 0.1245, wR <sub>2</sub> = 0.2974                                |               | R <sub>1</sub> = 0.2076, wR <sub>2</sub> = 0.2972               |               |
| <b>Largest diff. peak and hole</b>      | 0.952 and -0.821 e.Å <sup>-3</sup>                            |                 | 0.917 and -0.492 e.Å <sup>-3</sup>                                               |               | 0.347 and -0.230 e.Å <sup>-3</sup>                              |               |
| <b>CCDC Number</b>                      | 2534933                                                       |                 | 2534928                                                                          |               | 2534938                                                         |               |

**Table S1 (contd.):** Crystallographic Data for Isolated Compounds

| Compound                                | 8                                                                |                | 9                                                                                                |               | 10                                                                                               |                |
|-----------------------------------------|------------------------------------------------------------------|----------------|--------------------------------------------------------------------------------------------------|---------------|--------------------------------------------------------------------------------------------------|----------------|
| <b>Empirical formula</b>                | C <sub>130</sub> H <sub>206</sub> Mg <sub>3</sub> N <sub>4</sub> |                | C <sub>138</sub> H <sub>202</sub> Cr <sub>2</sub> Mg <sub>2</sub> N <sub>4</sub> O <sub>10</sub> |               | C <sub>152</sub> H <sub>234</sub> Mg <sub>2</sub> Mo <sub>2</sub> N <sub>4</sub> O <sub>10</sub> |                |
| <b>Formula weight</b>                   | 1897.91                                                          |                | 2229.64                                                                                          |               | 2517.92                                                                                          |                |
| <b>Temperature</b>                      | 100(2) K                                                         |                | 100(2) K                                                                                         |               | 100(2) K                                                                                         |                |
| <b>Crystal system</b>                   | Monoclinic                                                       |                | Monoclinic                                                                                       |               | Monoclinic                                                                                       |                |
| <b>Space group</b>                      | C2/c                                                             |                | P2 <sub>1</sub> /c                                                                               |               | P2 <sub>1</sub> /n                                                                               |                |
| <b>Unit cell dimensions</b>             | a = 28.460(6) Å                                                  | α = 90°        | a = 28.490(6) Å                                                                                  | α = 90°       | a = 21.490(4) Å                                                                                  | α = 90°        |
|                                         | b = 15.350(3) Å                                                  | β = 112.19(3)° | b = 16.970(3) Å                                                                                  | β = 97.79(3)° | b = 13.590(3) Å                                                                                  | β = 100.63(3)° |
|                                         | c = 30.730(6) Å                                                  | γ = 90°        | c = 26.340(5) Å                                                                                  | γ = 90°       | c = 25.000(5) Å                                                                                  | γ = 90°        |
| <b>Volume</b>                           | 12430(5) Å <sup>3</sup>                                          |                | 12617(4) Å <sup>3</sup>                                                                          |               | 7176(3) Å <sup>3</sup>                                                                           |                |
| <b>Z</b>                                | 4                                                                |                | 4                                                                                                |               | 2                                                                                                |                |
| <b>Density (calculated)</b>             | 1.014 Mg/m <sup>3</sup>                                          |                | 1.174 Mg/m <sup>3</sup>                                                                          |               | 1.165 Mg/m <sup>3</sup>                                                                          |                |
| <b>Absorption coefficient</b>           | 0.071 mm <sup>-1</sup>                                           |                | 0.241 mm <sup>-1</sup>                                                                           |               | 0.240 mm <sup>-1</sup>                                                                           |                |
| <b>F(000)</b>                           | 4200                                                             |                | 4840                                                                                             |               | 2724                                                                                             |                |
| <b>Crystal size</b>                     | 0.080 x 0.050 x 0.020 mm <sup>3</sup>                            |                | 0.110 x 0.090 x 0.030 mm <sup>3</sup>                                                            |               | 0.110 x 0.100 x 0.020 mm <sup>3</sup>                                                            |                |
| <b>Theta range for data collection</b>  | 1.535 to 26.371°                                                 |                | 0.721 to 26.372°                                                                                 |               | 1.382 to 26.373°                                                                                 |                |
| <b>Index ranges</b>                     | -35 ≤ h ≤ 35, -19 ≤ k ≤ 19, -38 ≤ l ≤ 38                         |                | -35 ≤ h ≤ 33, -21 ≤ k ≤ 21, -32 ≤ l ≤ 32                                                         |               | -26 ≤ h ≤ 26, -16 ≤ k ≤ 16, -31 ≤ l ≤ 31                                                         |                |
| <b>Reflections collected</b>            | 111398                                                           |                | 227507                                                                                           |               | 190732                                                                                           |                |
| <b>Independent reflections</b>          | 12466 [R(int) = 0.0866]                                          |                | 25662 [R(int) = 0.1366]                                                                          |               | 14647 [R(int) = 0.0570]                                                                          |                |
| <b>Completeness to theta = 67.684°</b>  | 99.70%                                                           |                | 99.90%                                                                                           |               | 99.80%                                                                                           |                |
| <b>Absorption correction</b>            | Semi-empirical from equivalents                                  |                | Semi-empirical from equivalents                                                                  |               | Semi-empirical from equivalents                                                                  |                |
| <b>Max. and min. transmission</b>       | Value not reported by XDS                                        |                | Value not reported by XDS                                                                        |               | Value not reported by XDS                                                                        |                |
| <b>Data / restraints / parameters</b>   | 12466 / 662 / 720                                                |                | 25662 / 409 / 1383                                                                               |               | 14647 / 593 / 819                                                                                |                |
| <b>Goodness-of-fit on F<sup>2</sup></b> | 0.99                                                             |                | 1.028                                                                                            |               | 1.047                                                                                            |                |
| <b>Final R indices [I &gt; 2σ(I)]</b>   | R <sub>1</sub> = 0.0759, wR <sub>2</sub> = 0.2144                |                | R <sub>1</sub> = 0.0869, wR <sub>2</sub> = 0.2290                                                |               | R <sub>1</sub> = 0.0445, wR <sub>2</sub> = 0.1297                                                |                |
| <b>R indices (all data)</b>             | R <sub>1</sub> = 0.1436, wR <sub>2</sub> = 0.2629                |                | R <sub>1</sub> = 0.1588, wR <sub>2</sub> = 0.2880                                                |               | R <sub>1</sub> = 0.0486, wR <sub>2</sub> = 0.1338                                                |                |
| <b>Largest diff. peak and hole</b>      | 0.293 and -0.253 e.Å <sup>-3</sup>                               |                | 0.767 and -0.486 e.Å <sup>-3</sup>                                                               |               | 0.794 and -0.370 e.Å <sup>-3</sup>                                                               |                |
| <b>CCDC Number</b>                      | 2534929                                                          |                | 2534937                                                                                          |               | 2534935                                                                                          |                |

**Table S1 (contd.):** Crystallographic Data for Isolated Compounds

| Compound                                | 11                                                                                              |                | 12                                                                                                              |         |
|-----------------------------------------|-------------------------------------------------------------------------------------------------|----------------|-----------------------------------------------------------------------------------------------------------------|---------|
| <b>Empirical formula</b>                | C <sub>144</sub> H <sub>220</sub> Mg <sub>2</sub> Mn <sub>2</sub> N <sub>4</sub> O <sub>8</sub> |                | C <sub>150</sub> H <sub>234</sub> Fe <sub>2</sub> Mg <sub>2</sub> N <sub>4</sub> Na <sub>2</sub> O <sub>8</sub> |         |
| <b>Formula weight</b>                   | 2293.73                                                                                         |                | 2427.7                                                                                                          |         |
| <b>Temperature</b>                      | 123.0(1) K                                                                                      |                | 100(2) K                                                                                                        |         |
| <b>Crystal system</b>                   | Monoclinic                                                                                      |                | Orthorhombic                                                                                                    |         |
| <b>Space group</b>                      | <i>P2<sub>1</sub></i>                                                                           |                | <i>Pbcn</i>                                                                                                     |         |
| <b>Unit cell dimensions</b>             | a = 12.5782(5) Å                                                                                | α = 90°        | a = 22.520(5) Å                                                                                                 | α = 90° |
|                                         | b = 36.5924(17) Å                                                                               | β = 93.938(3)° | b = 30.790(6) Å                                                                                                 | β = 90° |
|                                         | c = 14.8905(5) Å                                                                                | γ = 90°        | c = 20.820(4) Å                                                                                                 | γ = 90° |
| <b>Volume</b>                           | 6837.4(5) Å <sup>3</sup>                                                                        |                | 14436(5) Å <sup>3</sup>                                                                                         |         |
| <b>Z</b>                                | 2                                                                                               |                | 4                                                                                                               |         |
| <b>Density (calculated)</b>             | 1.114 Mg/m <sup>3</sup>                                                                         |                | 1.117 Mg/m <sup>3</sup>                                                                                         |         |
| <b>Absorption coefficient</b>           | 2.008 mm <sup>-1</sup>                                                                          |                | 0.270 mm <sup>-1</sup>                                                                                          |         |
| <b>F(000)</b>                           | 2500                                                                                            |                | 5296                                                                                                            |         |
| <b>Crystal size</b>                     | 0.280 x 0.210 x 0.190 mm <sup>3</sup>                                                           |                | 0.210 x 0.100 x 0.090 mm <sup>3</sup>                                                                           |         |
| <b>Theta range for data collection</b>  | 3.522 to 81.308°                                                                                |                | 1.120 to 26.372°                                                                                                |         |
| <b>Index ranges</b>                     | -16 ≤ h ≤ 15, -43 ≤ k ≤ 46, -14 ≤ l ≤ 19                                                        |                | -28 ≤ h ≤ 28, -38 ≤ k ≤ 38, -25 ≤ l ≤ 25                                                                        |         |
| <b>Reflections collected</b>            | 75283                                                                                           |                | 338054                                                                                                          |         |
| <b>Independent reflections</b>          | 24636 [R(int) = 0.1442]                                                                         |                | 14741 [R(int) = 0.1215]                                                                                         |         |
| <b>Completeness to theta = 67.684 °</b> | 99.90%                                                                                          |                | 99.80%                                                                                                          |         |
| <b>Absorption correction</b>            | Semi-empirical from equivalents                                                                 |                | Semi-empirical from equivalents                                                                                 |         |
| <b>Max. and min. transmission</b>       | 1.00000 and 0.52544                                                                             |                | Value not reported by XDS                                                                                       |         |
| <b>Data / restraints / parameters</b>   | 24636 / 1841 / 1401                                                                             |                | 14741 / 266 / 711                                                                                               |         |
| <b>Goodness-of-fit on F<sup>2</sup></b> | 1.02                                                                                            |                | 1.028                                                                                                           |         |
| <b>Final R indices [I &gt; 2σ(I)]</b>   | R <sub>1</sub> = 0.1041, wR <sub>2</sub> = 0.2556                                               |                | R <sub>1</sub> = 0.0605, wR <sub>2</sub> = 0.1596                                                               |         |
| <b>R indices (all data)</b>             | R <sub>1</sub> = 0.1571, wR <sub>2</sub> = 0.2940                                               |                | R <sub>1</sub> = 0.0941, wR <sub>2</sub> = 0.1795                                                               |         |
| <b>Largest diff. peak and hole</b>      | 1.075 and -0.523 e.Å <sup>-3</sup>                                                              |                | 0.668 and -0.400 e.Å <sup>-3</sup>                                                                              |         |
| <b>CCDC Number</b>                      | 2534930                                                                                         |                | 2534932                                                                                                         |         |

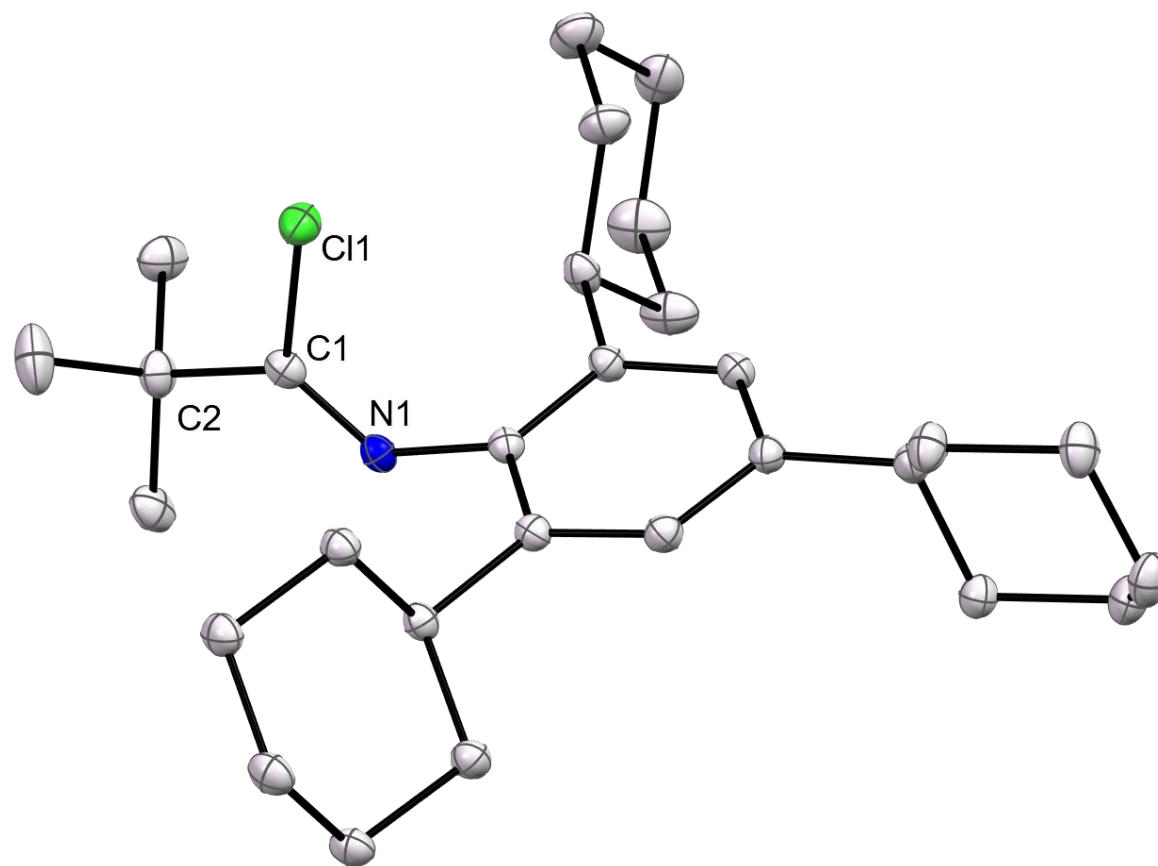

**Figure S91:** Molecular structure of (TCHP)NC(Cl)Bu' (thermal ellipsoids shown at 30% probability; hydrogen atoms omitted).

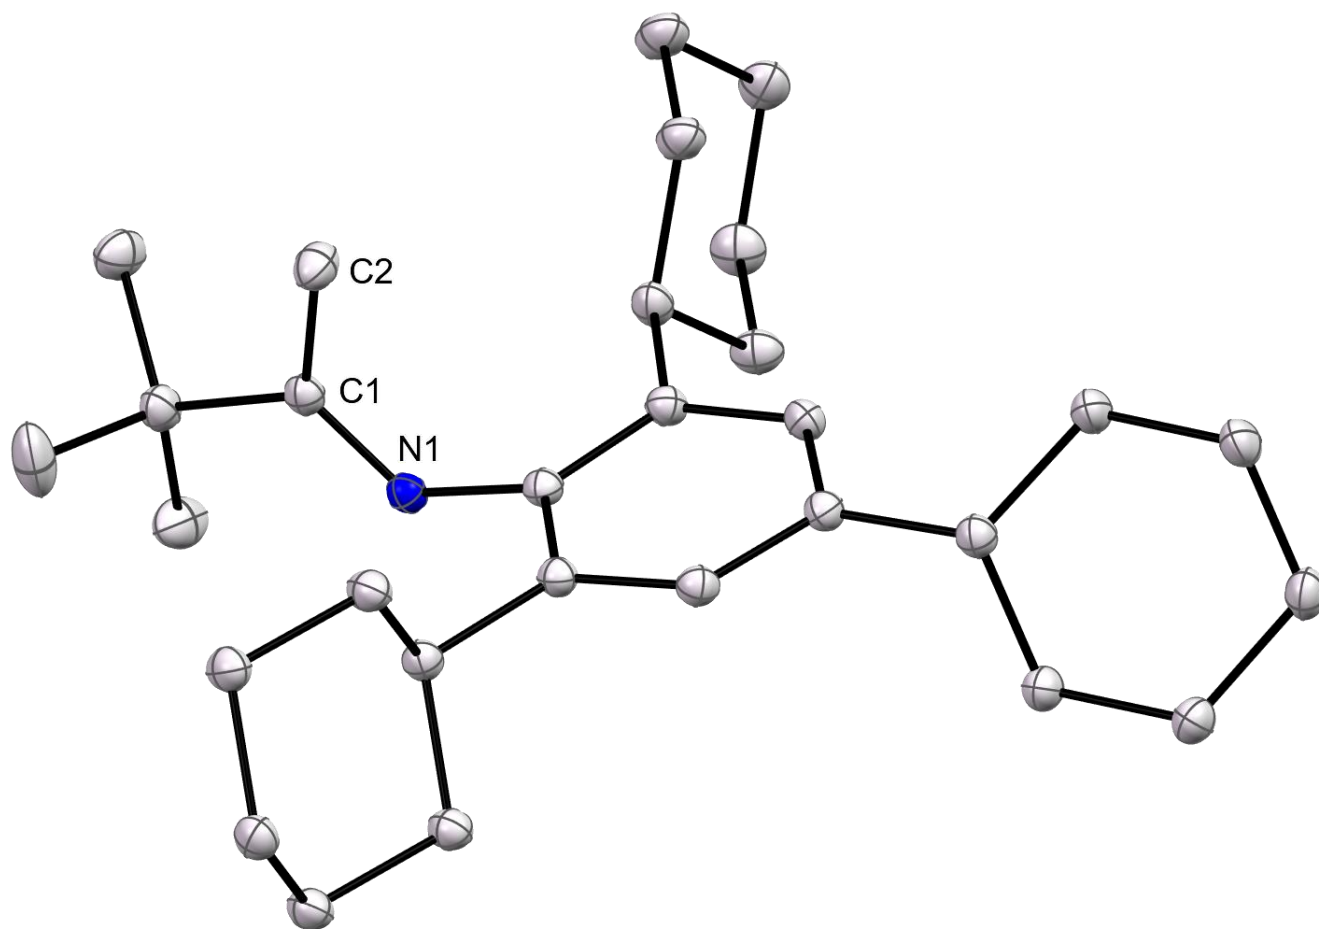

**Figure S92:** Molecular structure of (TCHP)NC(Me)Bu' (thermal ellipsoids shown at 30% probability; hydrogen atoms omitted).

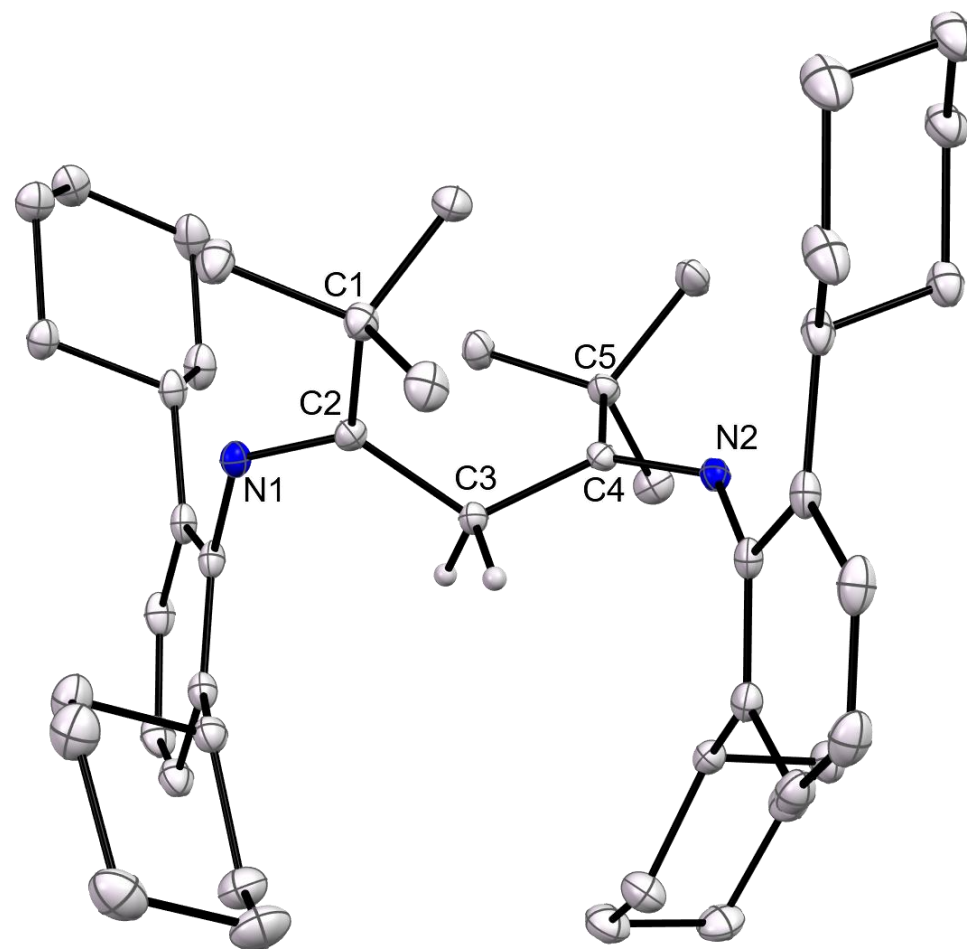

**Figure S93:** Molecular structure of the bis(imine) tautomer of  $^{\text{DCHP}}\text{NacnacH}$  (thermal ellipsoids shown at 30% probability; hydrogen atoms, except backbone methylene protons, omitted).

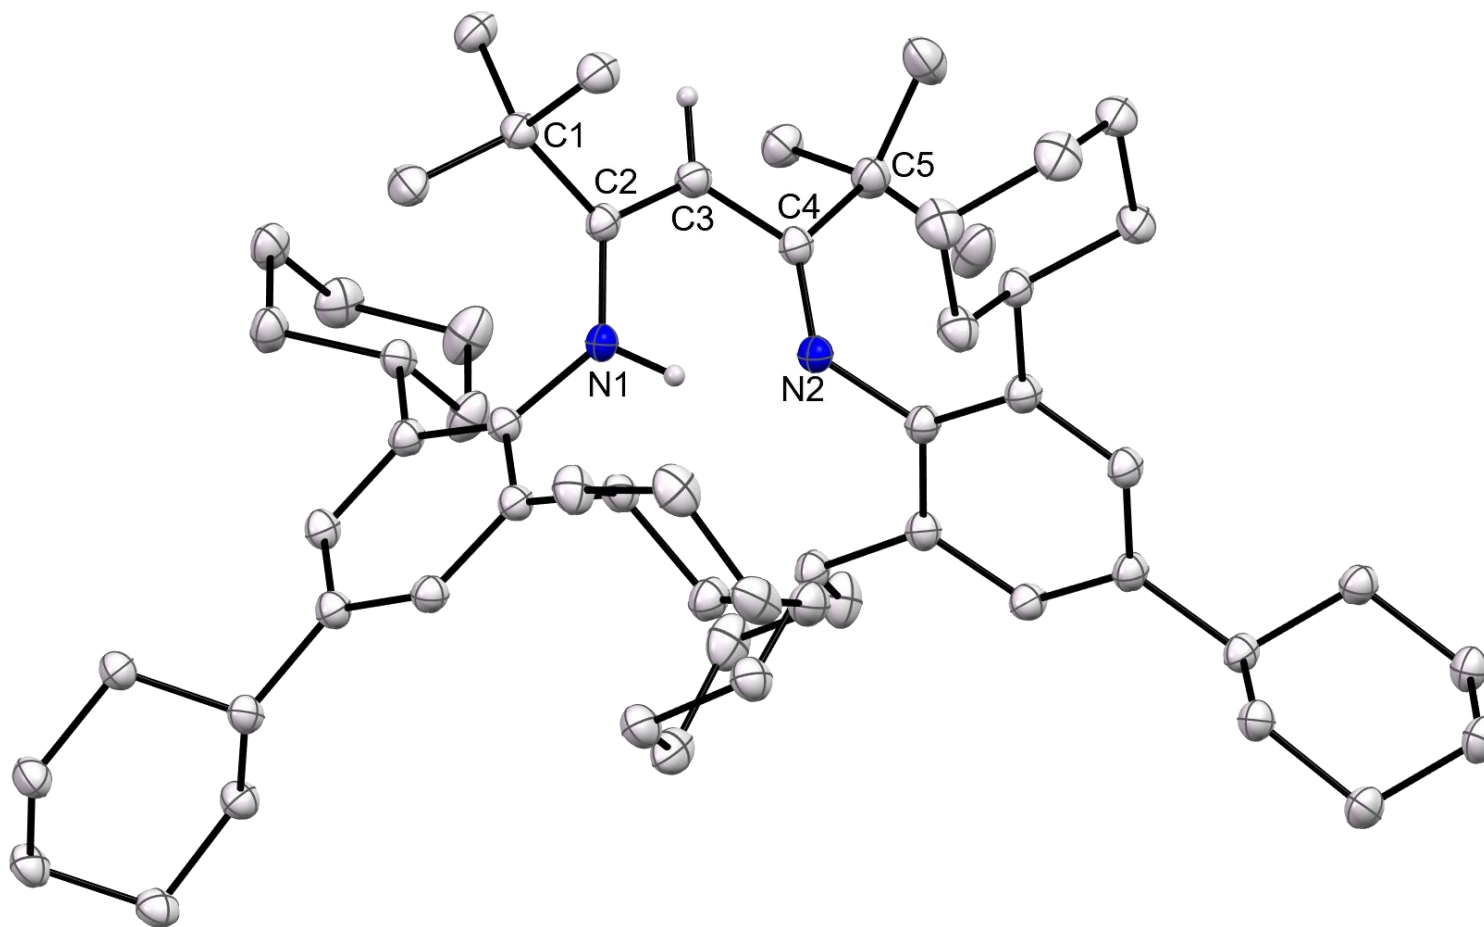

**Figure S94:** Molecular structure of the enamine tautomer of <sup>TCHP</sup>NacnacH (thermal ellipsoids shown at 30% probability; hydrogen atoms, except amine and backbone methine protons, omitted).

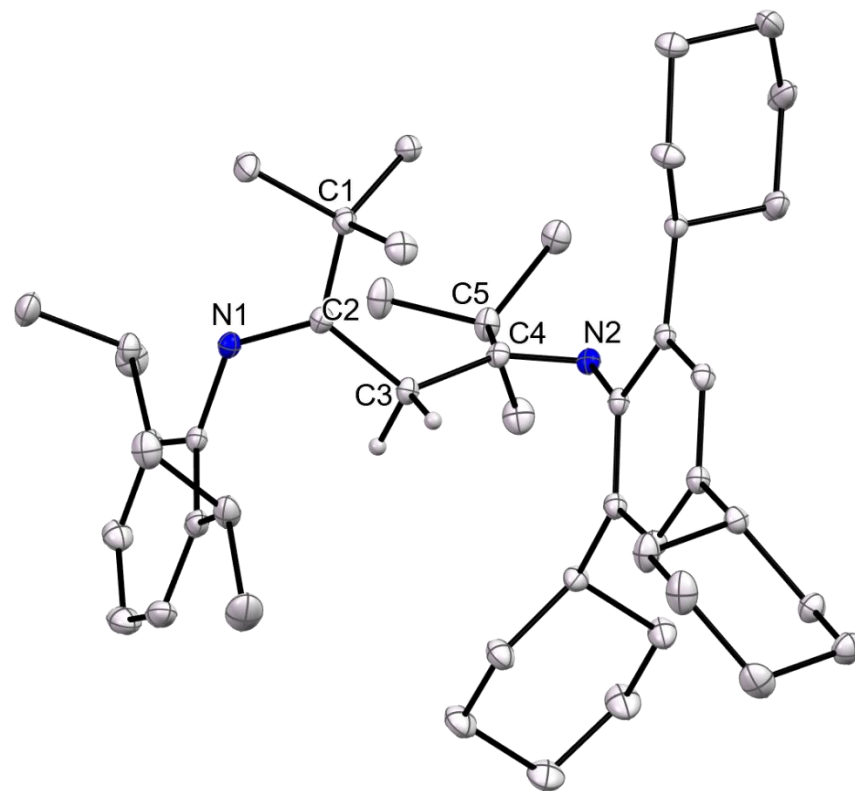

**Figure S95:** Molecular structure of the bis(imine) tautomer of  $^{\text{TCHP/Dip}}\text{NacnacH}$  (thermal ellipsoids shown at 30% probability; hydrogen atoms, except backbone methylene protons, omitted).

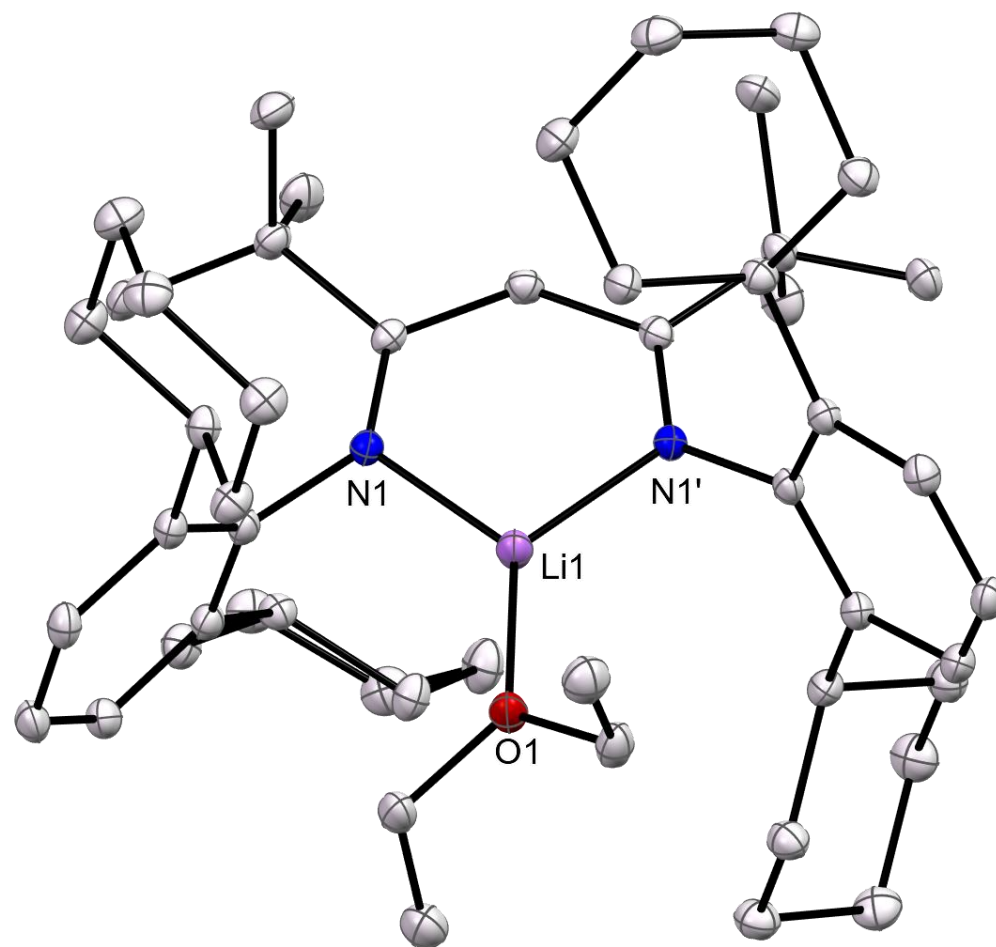

**Figure S96:** Molecular structure of  $[(^{\text{DCHP}}\text{Nacnac})\text{Li}(\text{OEt}_2)]$  (thermal ellipsoids shown at 30% probability; hydrogen atoms omitted).

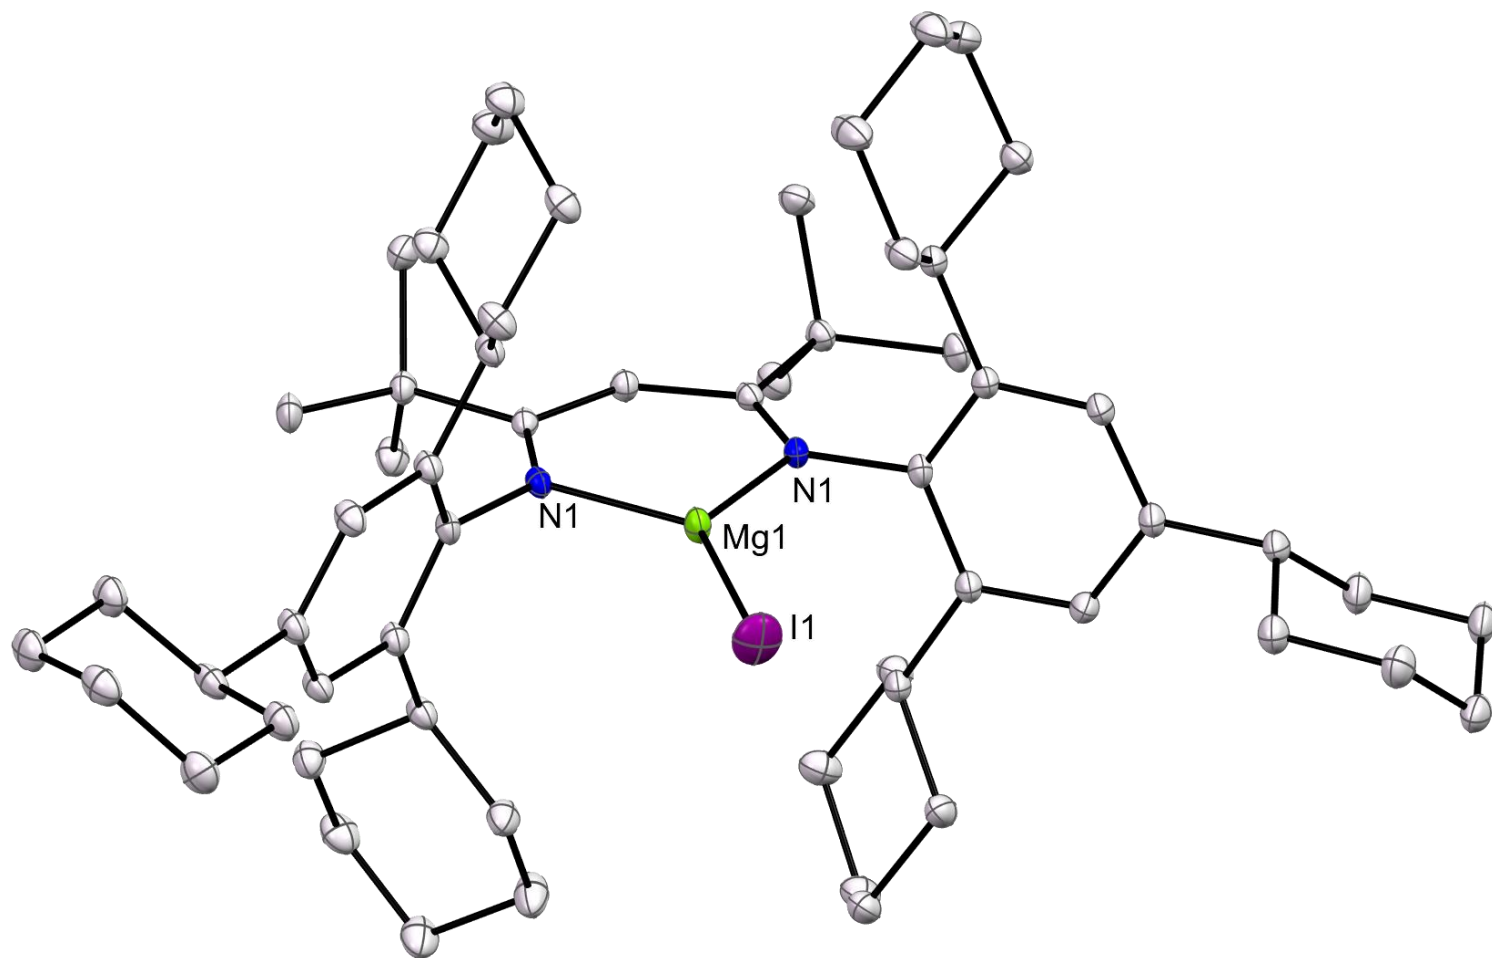

**Figure S97:** Molecular structure of compound **1** (thermal ellipsoids shown at 25% probability; hydrogen atoms omitted).

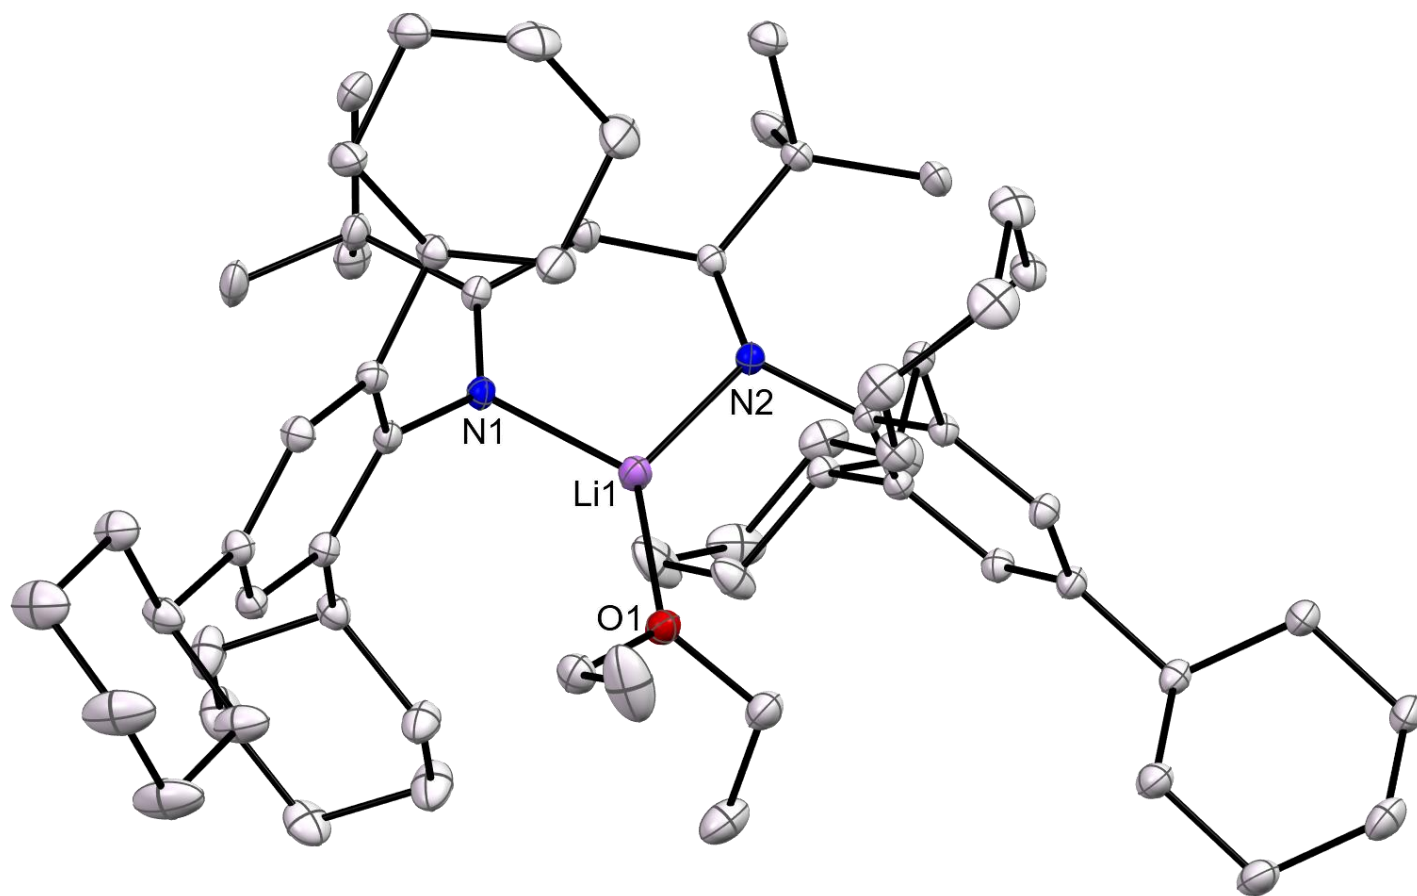

**Figure S98:** Molecular structure of compound 2 (thermal ellipsoids shown at 30% probability; hydrogen atoms omitted).

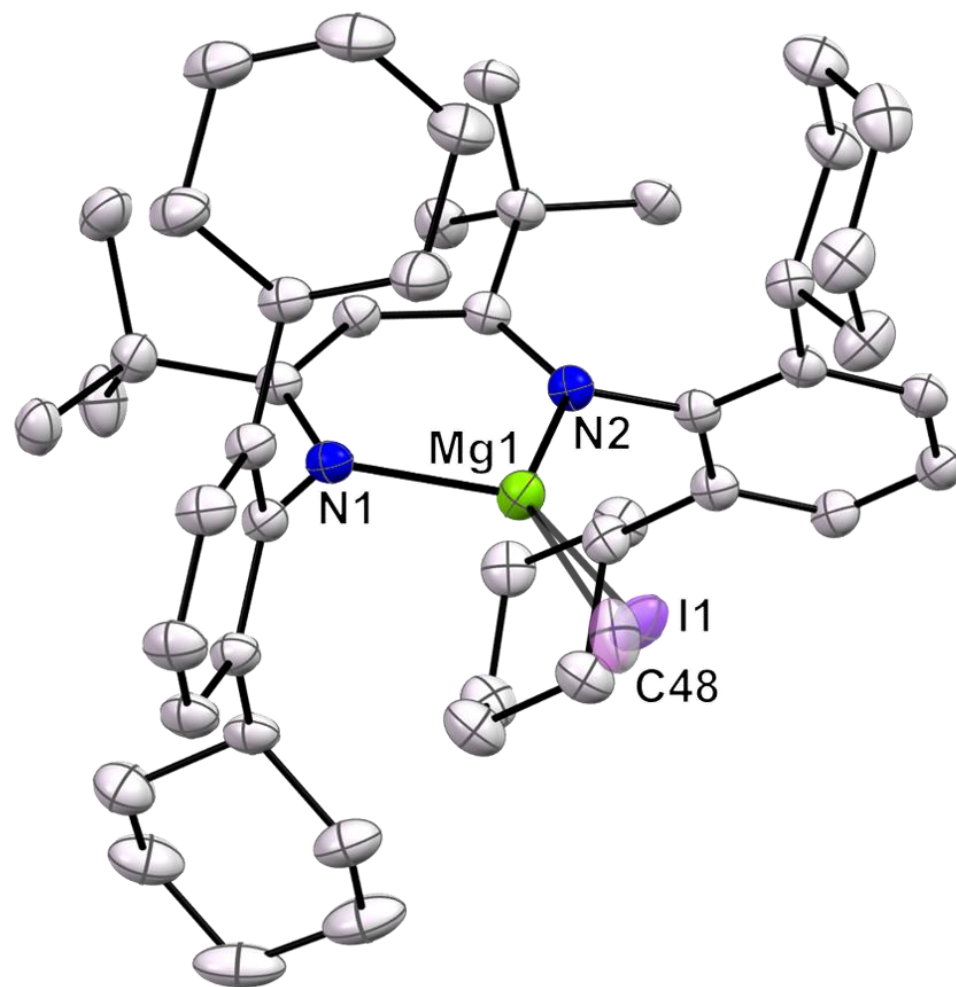

**Figure S99:** Molecular structure of the co-crystallised mixture of compounds **3** and **3-Me** (thermal ellipsoids shown at 30% probability; hydrogen atoms omitted).

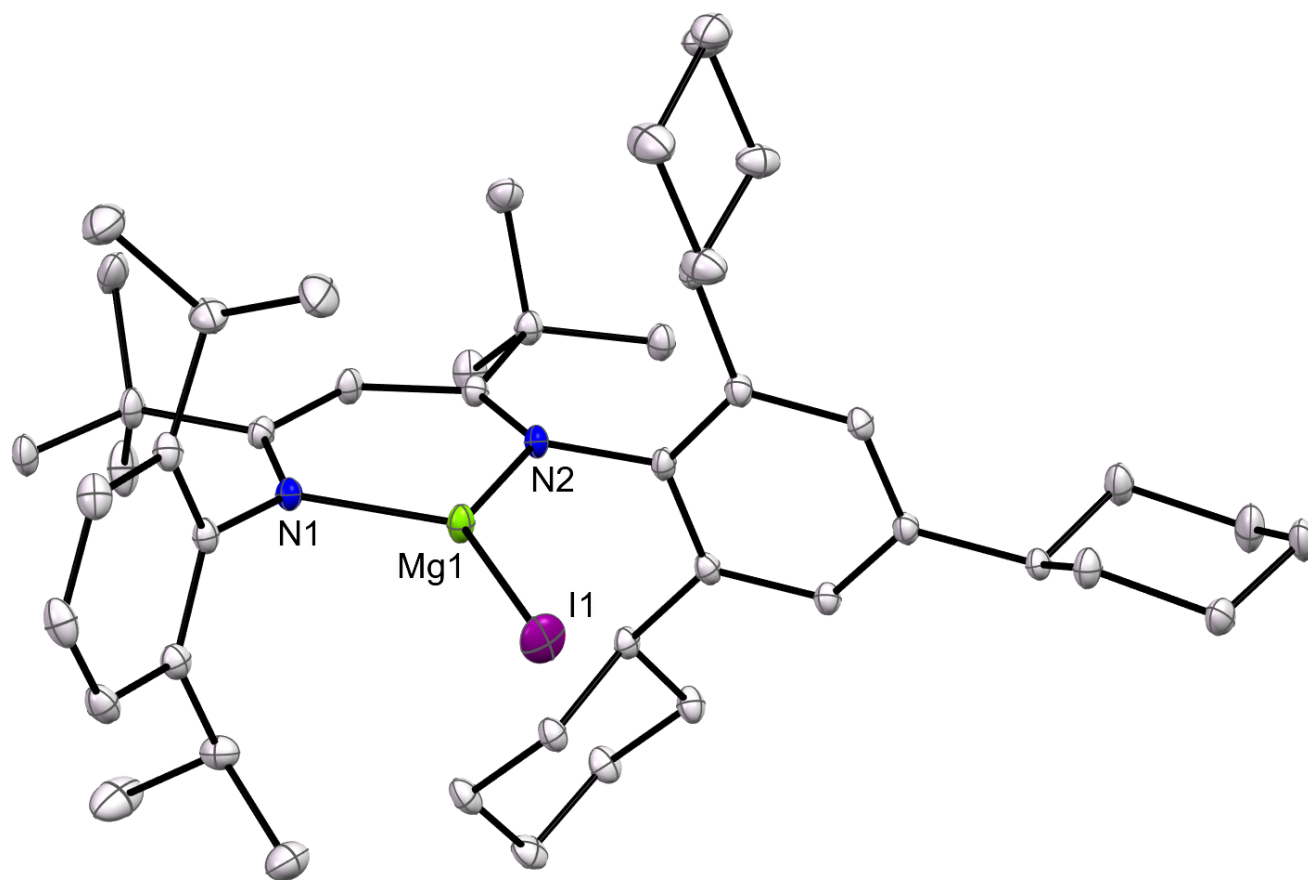

**Figure S100:** Molecular structure of compound **5** (thermal ellipsoids shown at 25% probability; hydrogen atoms omitted).

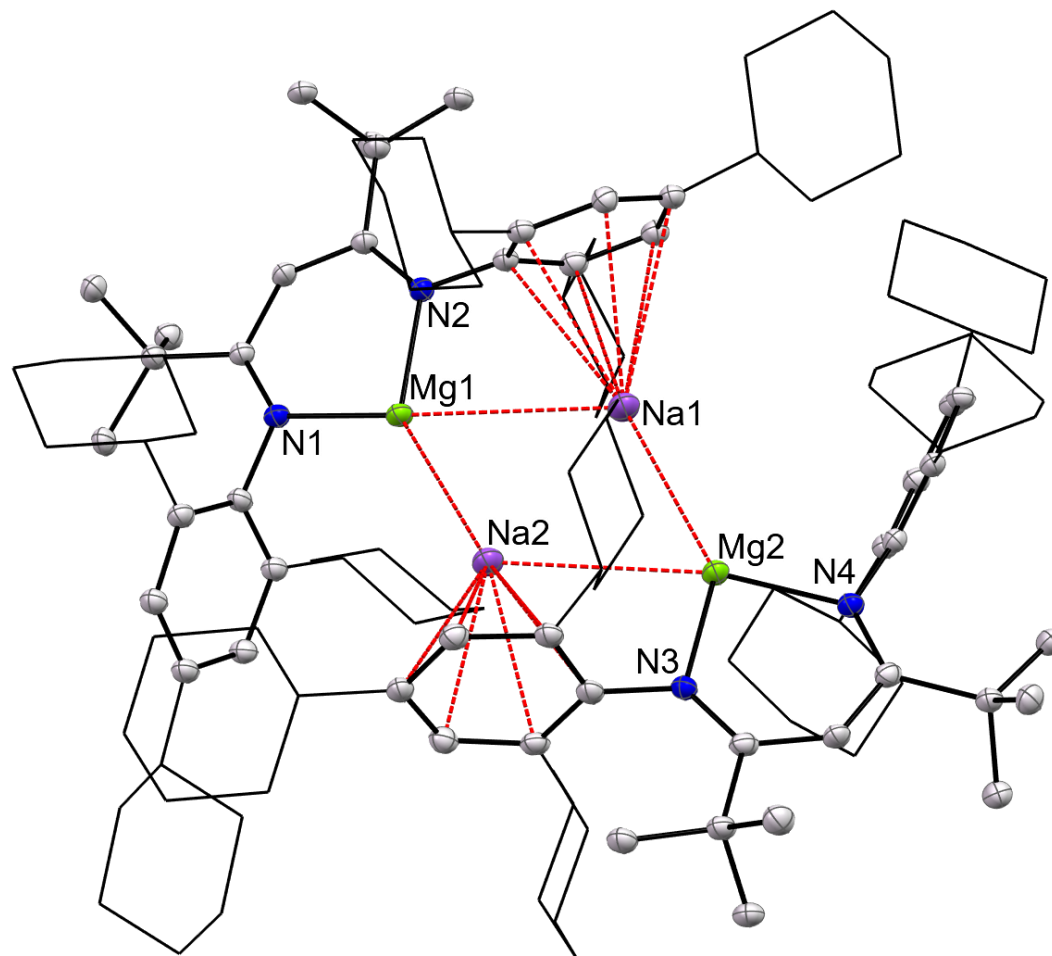

**Figure S101:** Molecular structure of **6** (25% thermal ellipsoids; hydrogen atoms omitted; cyclohexyl groups shown as wireframe for clarity).

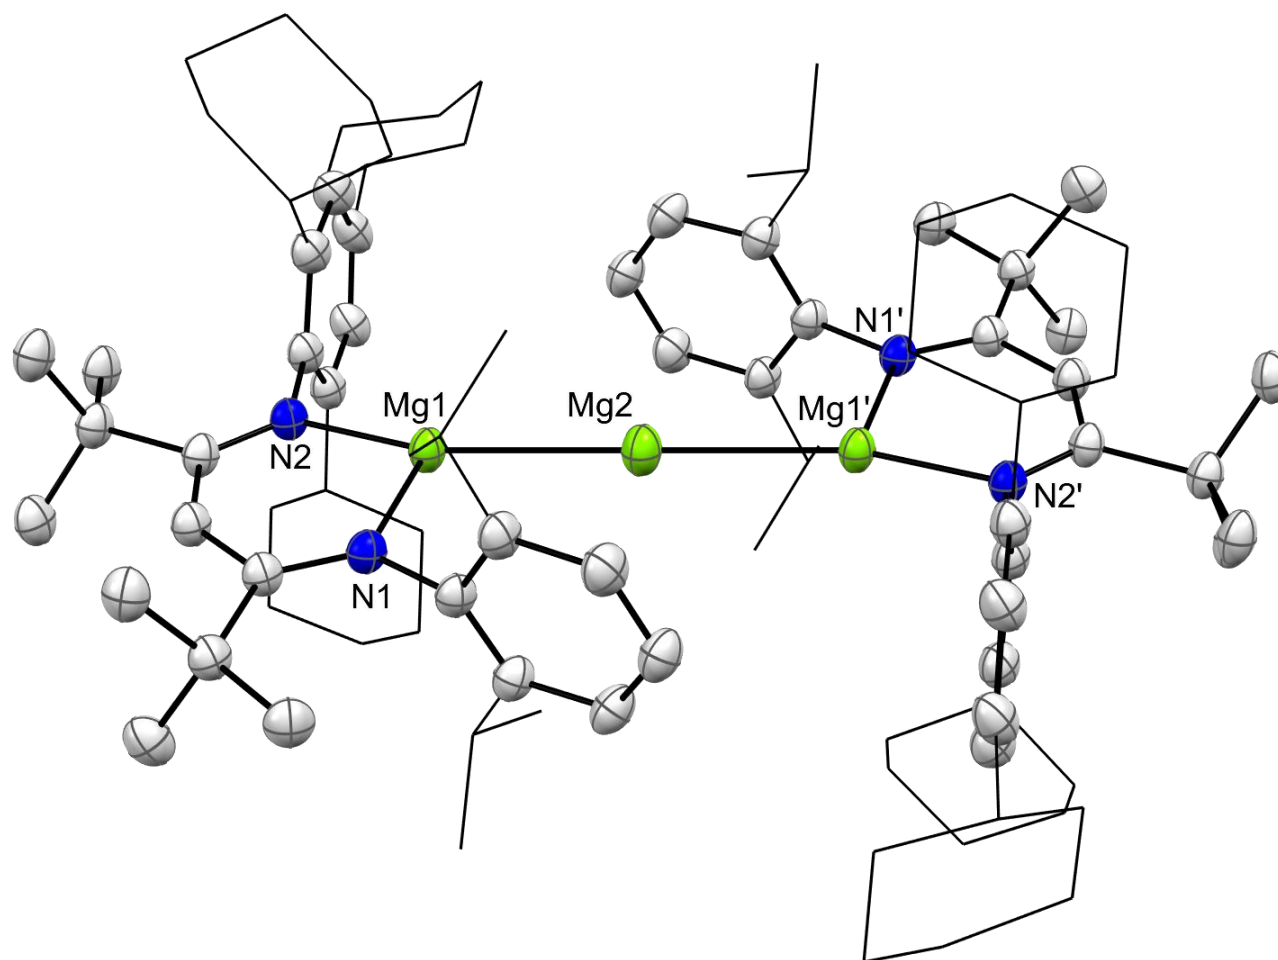

**Figure S102:** Molecular structure of **7** (25% thermal ellipsoids; hydrogen atoms omitted; cyclohexyl and isopropyl groups shown as wireframe for clarity).

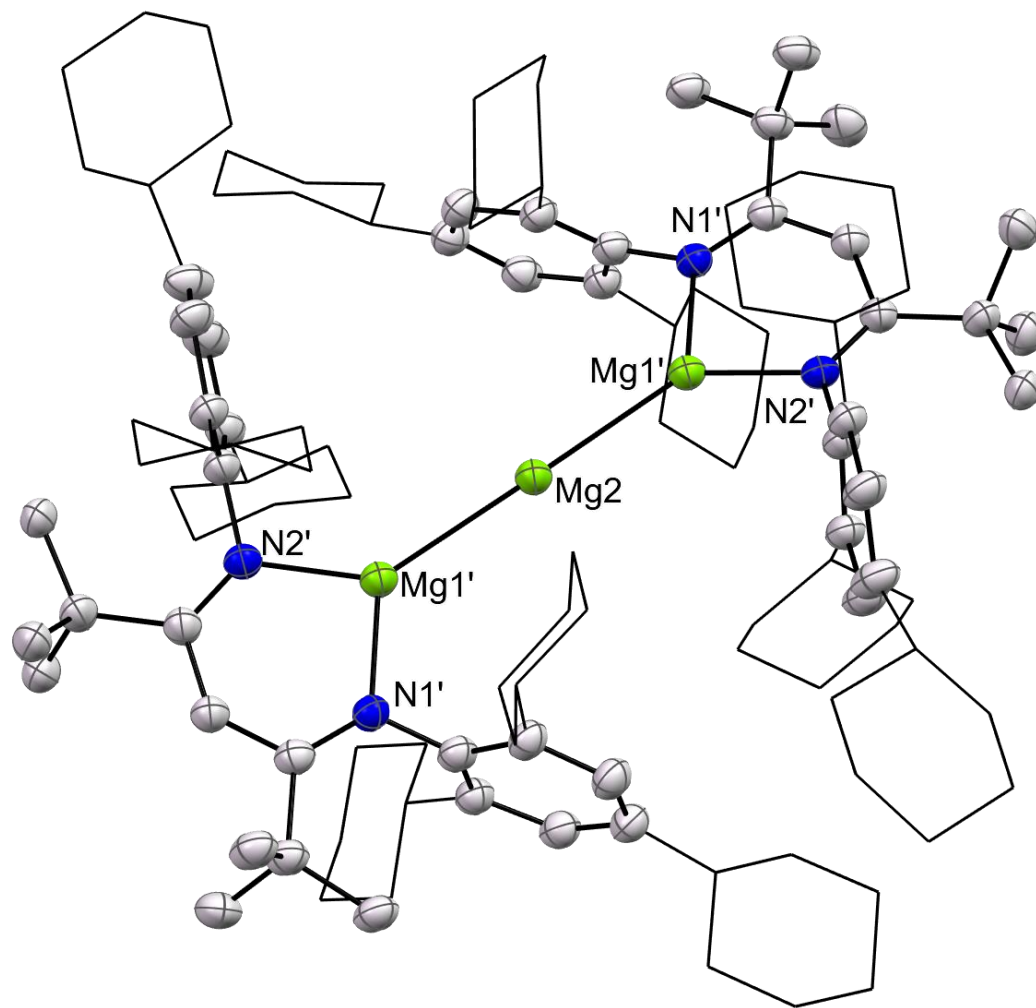

**Figure S103:** Molecular structure of **8** (25% thermal ellipsoids; hydrogen atoms omitted; cyclohexyl groups shown as wireframe for clarity).

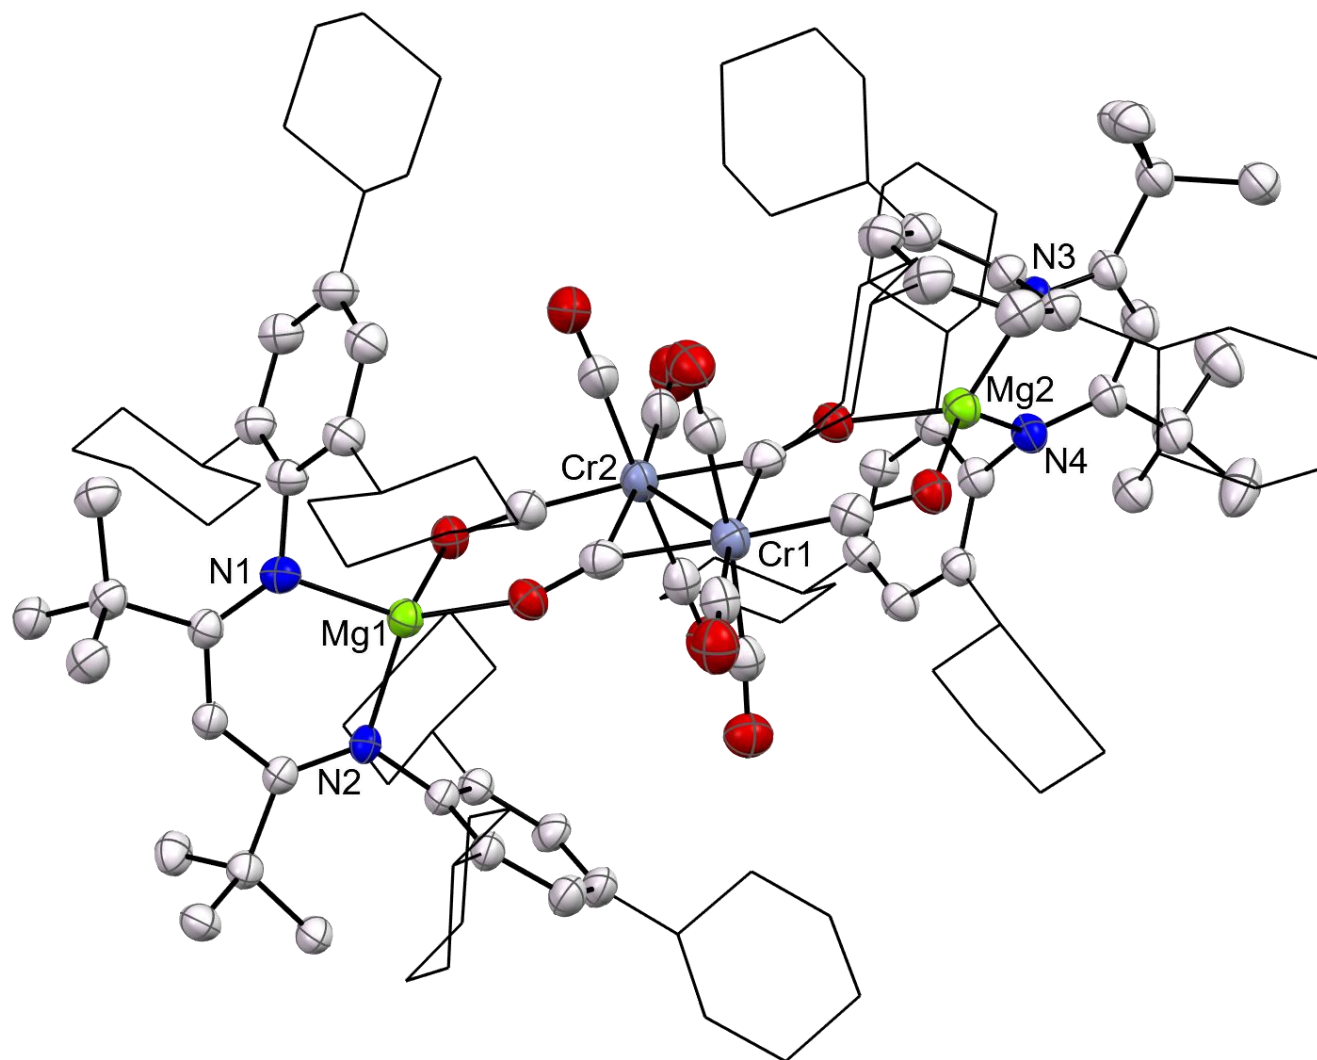

**Figure S104:** Molecular structure of **9** (25% thermal ellipsoids; hydrogen atoms omitted; cyclohexyl groups shown as wireframe for clarity).

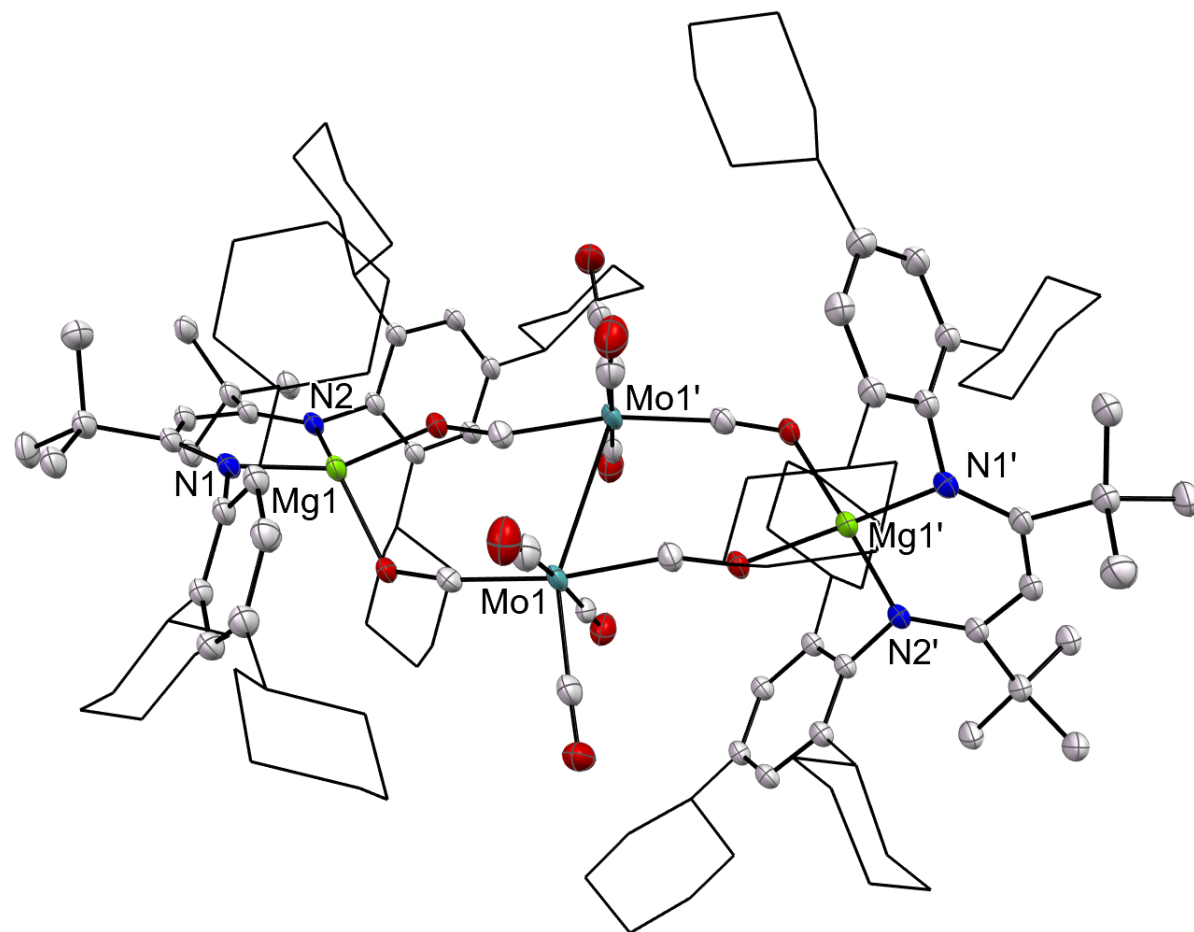

**Figure S105:** Molecular structure of **10** (25% thermal ellipsoids; hydrogen atoms omitted; cyclohexyl groups shown as wireframe for clarity).

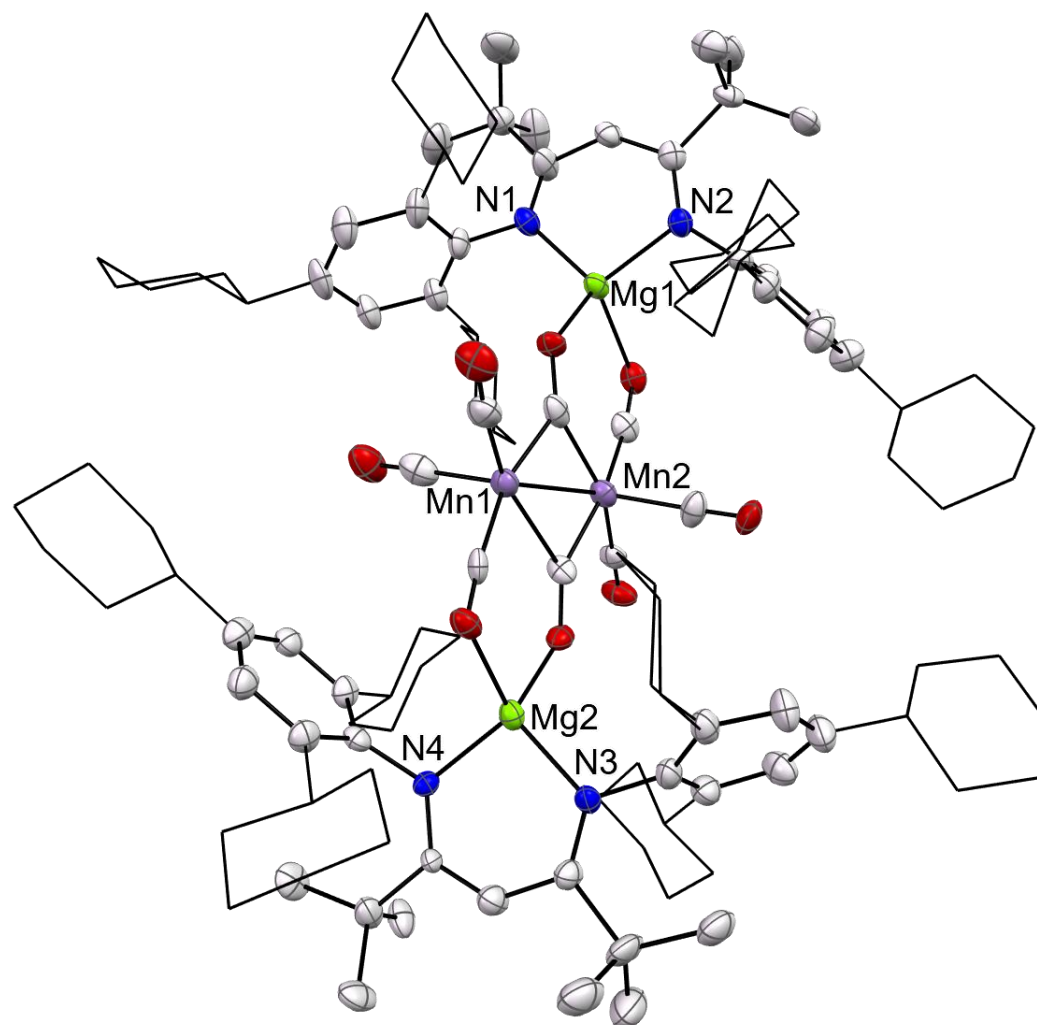

**Figure S106:** Molecular structure of **11** (25% thermal ellipsoids; hydrogen atoms omitted; cyclohexyl groups shown as wireframe for clarity).

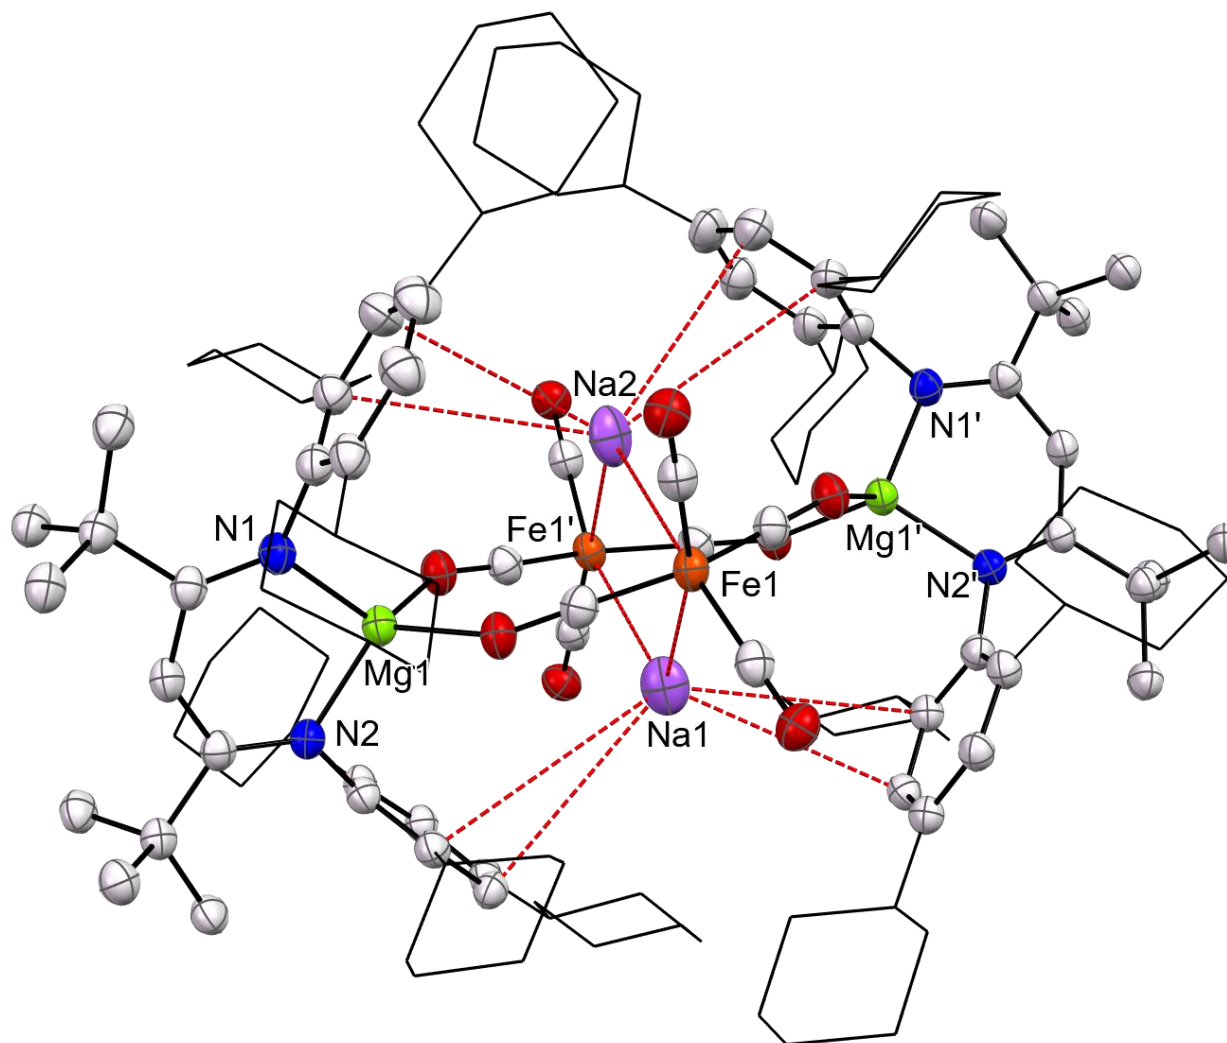

**Figure S107:** Molecular structure of **12** (25% thermal ellipsoids; hydrogen atoms omitted; cyclohexyl groups shown as wireframe for clarity).

### 3. Computational

All calculations were carried out using Gaussian 09 (Revision D01).<sup>[S10]</sup> All structures were fully optimised without the use of symmetry constraints (keyword: nosymm) at a B3PW91/def2svp level of theory.<sup>[S11–13]</sup> Grimme 3D dispersion corrections were included in the optimisation process using Becke-Johnson dampening (GD3BJ).<sup>[S14]</sup> Frequency analyses were performed on all stationary points to confirm their nature as minima. Energies were determined at the updated B3PW91/def2tzvp level of theory including Grimme 3D dispersion corrections (GD3BJ). This computational model was used by Harder and co-workers on the only other reported magnesium(0) complex.<sup>[S15]</sup> The calculated structure matched the experimental data well, with the comparison tabulated below. Charges and key bonding metrics were calculated at the B3PW91-D3BJ/def2tzvp//def2svp level of theory using NBO 6.0.<sup>[S16]</sup> Non-Covalent Interaction (NCI) plots were performed using the DFT optimised geometry of **6** in the NCIPLOT 6.0 program.<sup>[S17]</sup> Atoms-In-Molecules (AIM) analysis was performed in the Multiwfn software package.<sup>[S18]</sup>

#### Comparison of Computational Model to Solid State Data

**Table S2:** Comparison of selected bond lengths and angles between the experimental and computational data for **6-8**.

|                        |                        |          | <b>XRD</b>                                | <b>DFT</b>                    |
|------------------------|------------------------|----------|-------------------------------------------|-------------------------------|
| <b>Bond length (Å)</b> | <b>6</b>               | Mg–Na    | 3.154(2), 3.528(2),<br>3.479(2), 3.217(2) | 3.061, 3.365,<br>3.021, 3.572 |
|                        |                        | Mg–Mg    | 5.812(2)                                  | 5.752                         |
|                        |                        | Na–Na    | 3.303(3)                                  | 3.063                         |
|                        |                        | Mg–N     | 2.108(3), 2.118(3),<br>2.136(3), 2.107(3) | 2.125, 2.154,<br>2.141, 2.137 |
|                        |                        | N–N      | 2.998(5), 2.997(4)                        | 3.054, 2.998                  |
|                        |                        | <b>7</b> | Mg–Mg                                     | 2.828, 2.828                  |
|                        | Mg–N                   |          | 2.053, 2.066,<br>2.053, 2.066             |                               |
|                        | <b>8</b>               | Mg–Mg    | 2.840, 2.840                              |                               |
|                        |                        | Mg–N     | 2.043, 2.050,<br>2.043, 2.050             |                               |
|                        | <b>Bond Angles (°)</b> | <b>6</b> | N–Mg–N                                    | 89.9(1), 90.4(1)              |
| <b>7</b>               |                        | N–Mg–N   | 93.14, 93.14                              |                               |
|                        |                        | Mg–Mg–Mg | 180.00                                    |                               |
| <b>8</b>               |                        | N–Mg–N   | 93.25                                     |                               |
|                        |                        | Mg–Mg–Mg | 177.89                                    |                               |

## Molecular Orbitals

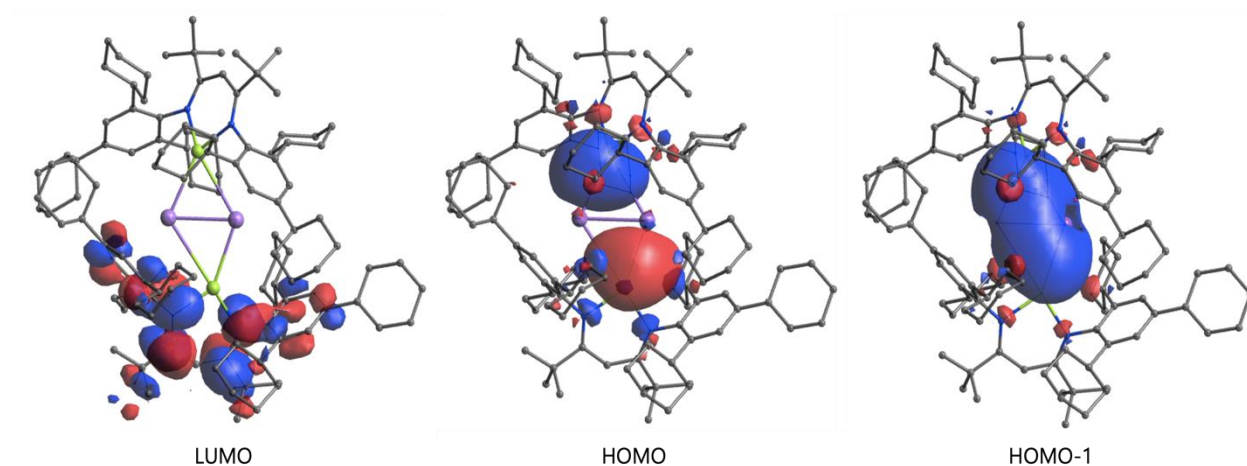

**Figure S108:** Selected frontier molecular orbitals of **6**. Energies calculated at the B3PW91(GD3BJ)/def2tzvp level of theory: LUMO = -0.949; HOMO = -2.724; HOMO-1 = -3.742 eV.

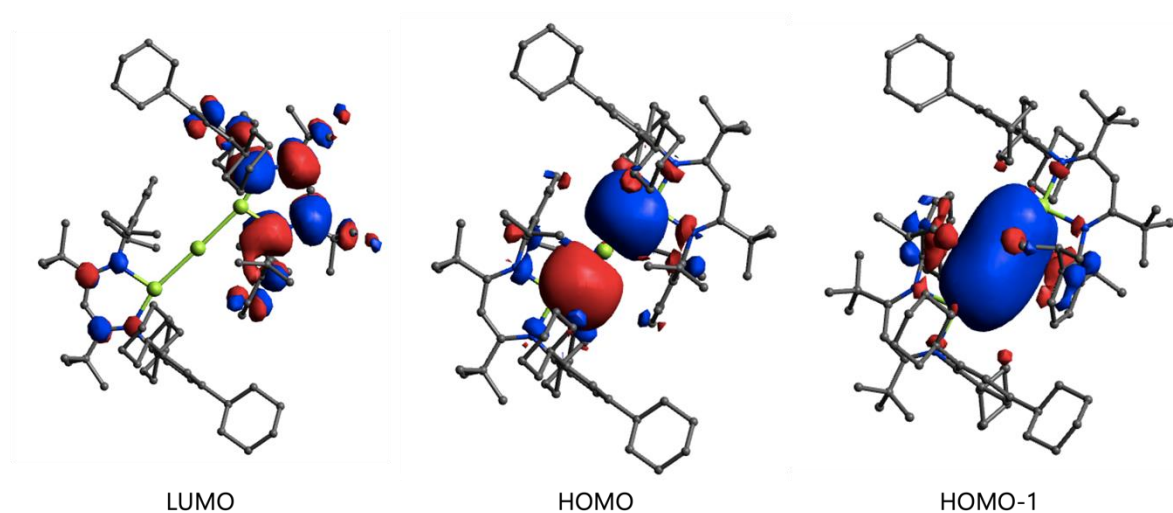

**Figure S109:** Selected frontier molecular orbitals of **7**. Energies calculated at the B3PW91(GD3BJ)/def2tzvp level of theory: LUMO = -0.820; HOMO = -3.209; HOMO-1 = -4.900 eV.

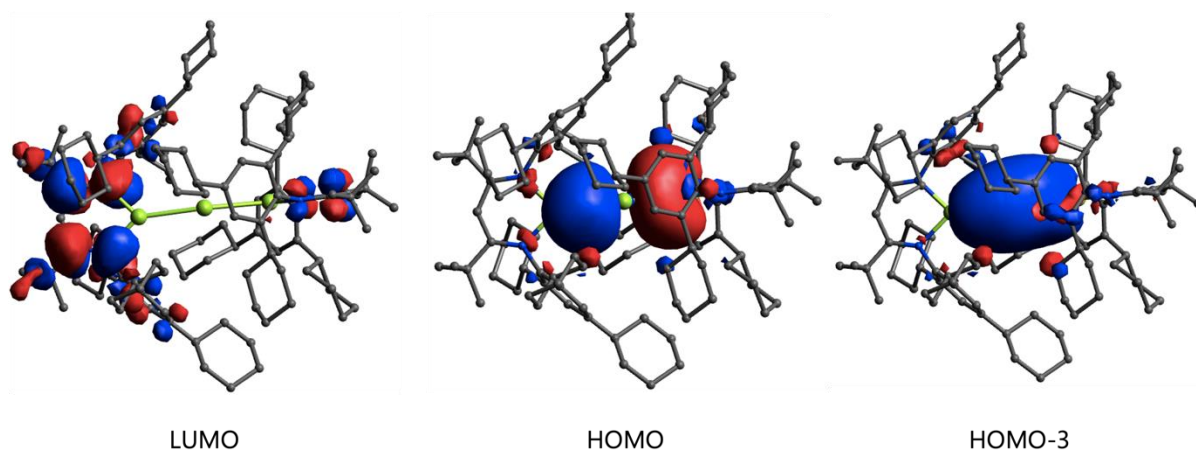

**Figure S110:** Selected frontier molecular orbitals of **8**. Energies calculated at the B3PW91(GD3BJ)/def2tzvp level of theory: LUMO = -0.929; HOMO = -3.337; HOMO-3 = -5.074 eV.

*Non-Covalent Interaction (NCI) Plot*

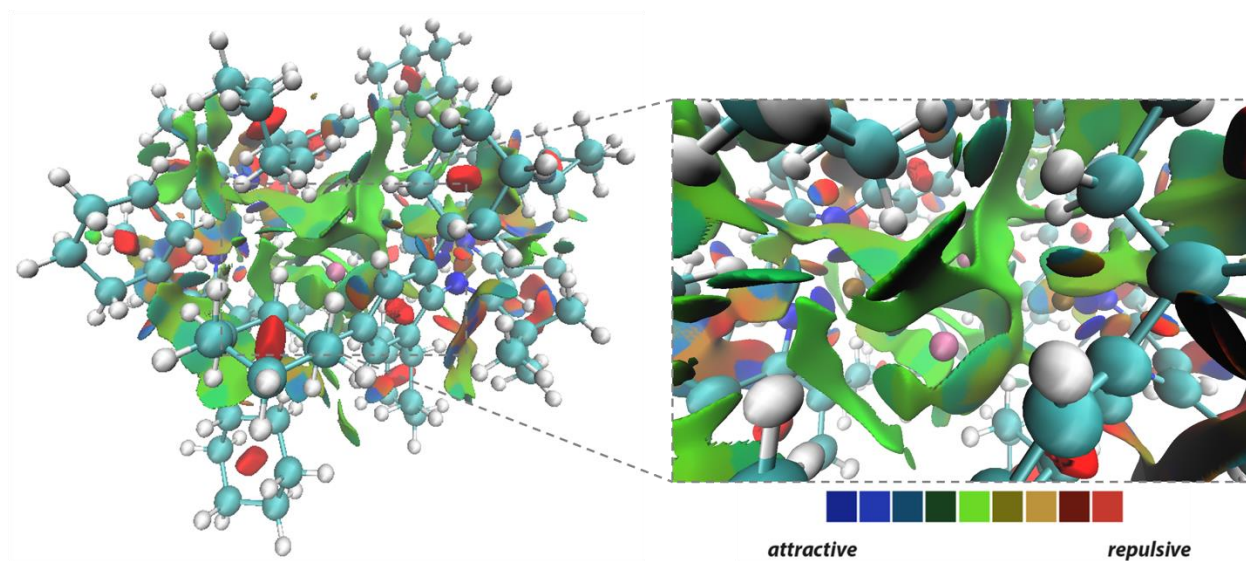

**Figure S111:** NCI plot of **6**.

### Atoms-In-Molecules (AIM) Calculations

|          | Bond    | Density of<br>all<br>electrons<br>$\rho(r)$ | Laplacian<br>of electron<br>density $\nabla^2$<br>$2\rho(r)$ | Lagrangian<br>kinetic<br>energy<br>$G(r)$ | Potential<br>energy<br>density<br>$V(r)$ | Energy<br>density<br>$H(r)$ | Ellipticity<br>of electron<br>density $\epsilon$ |
|----------|---------|---------------------------------------------|--------------------------------------------------------------|-------------------------------------------|------------------------------------------|-----------------------------|--------------------------------------------------|
| <b>6</b> | Mg1–Na1 | 0.016                                       | 0.019                                                        | 0.0009                                    | -0.0035                                  | -0.0025                     | 0.065                                            |
|          | Mg2–Na1 | 0.009                                       | 0.012                                                        | 0.0007                                    | -0.0018                                  | -0.0011                     | 0.072                                            |
|          | Mg2–Na2 | 0.015                                       | 0.019                                                        | 0.0009                                    | -0.0032                                  | -0.0023                     | 0.075                                            |
|          | Mg1–Na2 | 0.008                                       | 0.0076                                                       | 0.0022                                    | -0.0025                                  | -0.0003                     | 0.072                                            |
| <b>7</b> | Mg1–Mg2 | 0.030                                       | -0.0069                                                      | 0.0007                                    | -0.0107                                  | -0.0100                     | 0.038                                            |
|          | Mg2–Mg3 | 0.030                                       | -0.0067                                                      | 0.0007                                    | -0.0105                                  | -0.0099                     | 0.040                                            |
| <b>8</b> | Mg1–Mg2 | 0.028                                       | -0.0082                                                      | 0.0005                                    | -0.0092                                  | -0.0087                     | 0.023                                            |
|          | Mg2–Mg3 | 0.028                                       | -0.0084                                                      | 0.0005                                    | -0.0093                                  | -0.0087                     | 0.027                                            |

**Table S3:** Summary of select data from the QTAIM calculations of Bond Critical Points (BCPs).

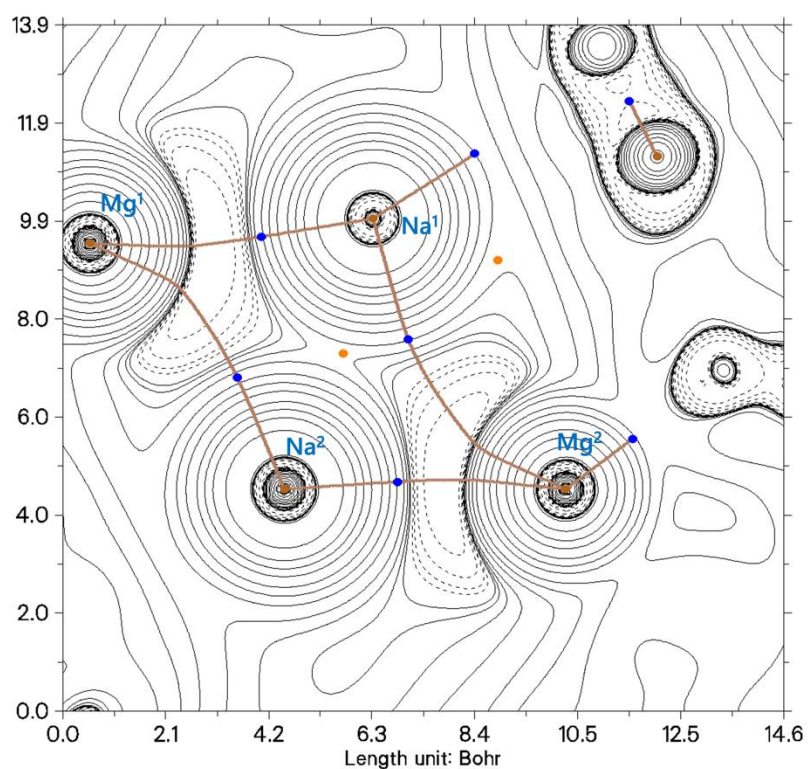

**Figure S112:** Laplacian distribution plot for **6**, from the AIM calculations. Bond- and ring critical points are shown as blue and orange dots respectively.

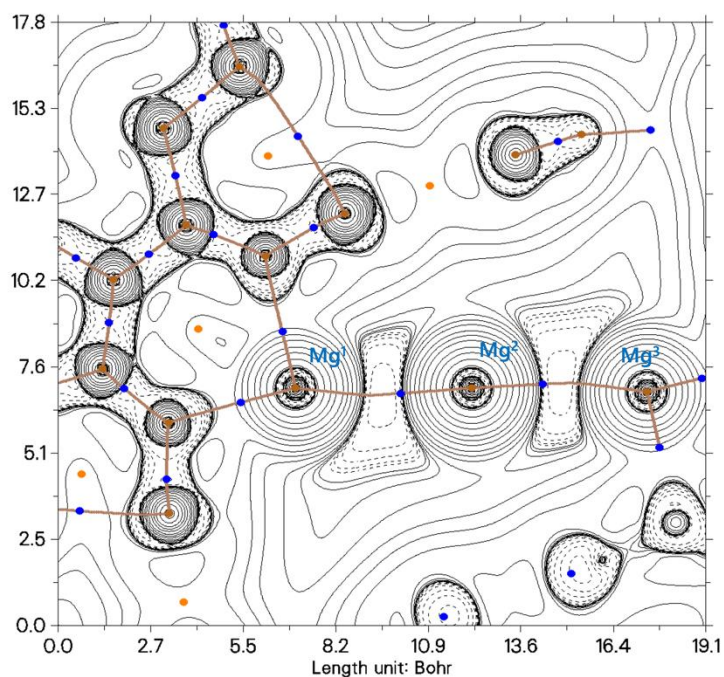

**Figure S113:** Laplacian distribution plot for **7**, from the AIM calculations. Bond- and ring critical points are shown as blue and orange dots respectively.

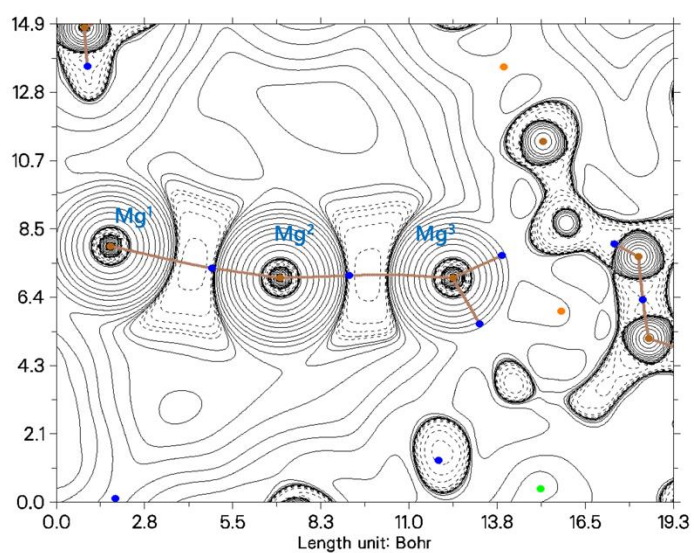

**Figure S114:** Laplacian distribution plot for **8**, from the AIM calculations. Bond- and ring critical points are shown as blue and orange dots respectively.

### Natural Bonding Orbital (NBO) Calculations

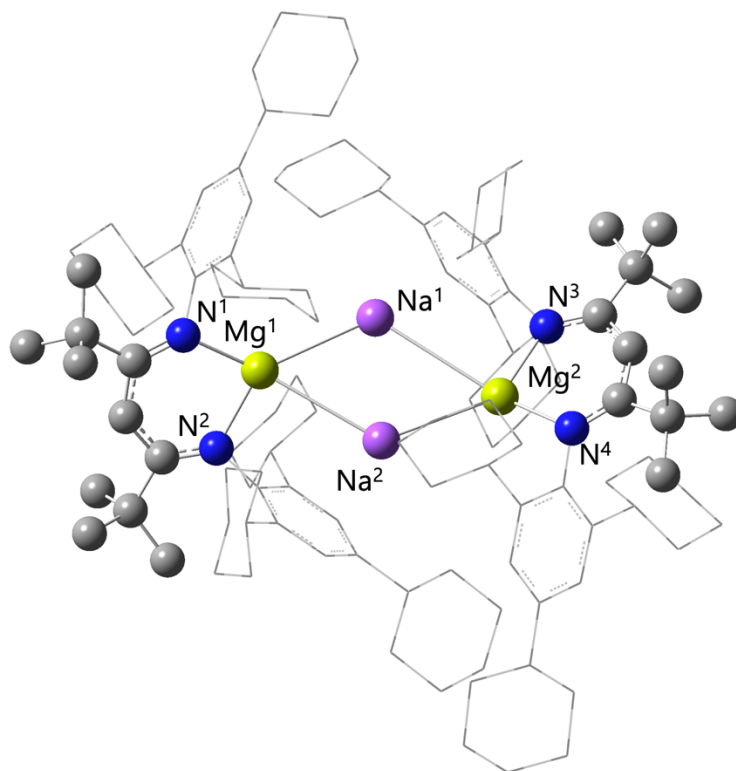

**Figure S115:** Labelled image of compound **6** used for NBO analysis. Hydrogen atoms omitted and tricyclohexylphenyl groups shown in wireframe for clarity.

**Table S4:** Select Natural population Analysis charges, and Bader charges (in parentheses), from the NBO and QTAIM analyses on compound **6**.

| Atom | Charge        | Atom | Charge |
|------|---------------|------|--------|
| Mg1  | +0.61 (+0.46) | N1   | -0.76  |
| Mg2  | +0.57 (+0.44) | N2   | -0.76  |
| Na1  | +0.37 (+0.69) | N3   | -0.76  |
| Na2  | +0.49 (+0.73) | N4   | -0.76  |

**Table S5:** Select Wiberg Bond Index (WBI) data from the NBO analysis on compound **6**.

| Bond    | WBI   | Bond    | WBI   |
|---------|-------|---------|-------|
| Mg1–N1  | 0.036 | Mg1–Na1 | 0.452 |
| Mg1–N2  | 0.035 | Mg1–Na2 | 0.071 |
| Mg2–N3  | 0.033 | Mg2–Na1 | 0.105 |
| Mg2–N4  | 0.035 | Mg2–Na2 | 0.396 |
| Mg1–Mg2 | 0.143 | Na1–Na2 | 0.190 |

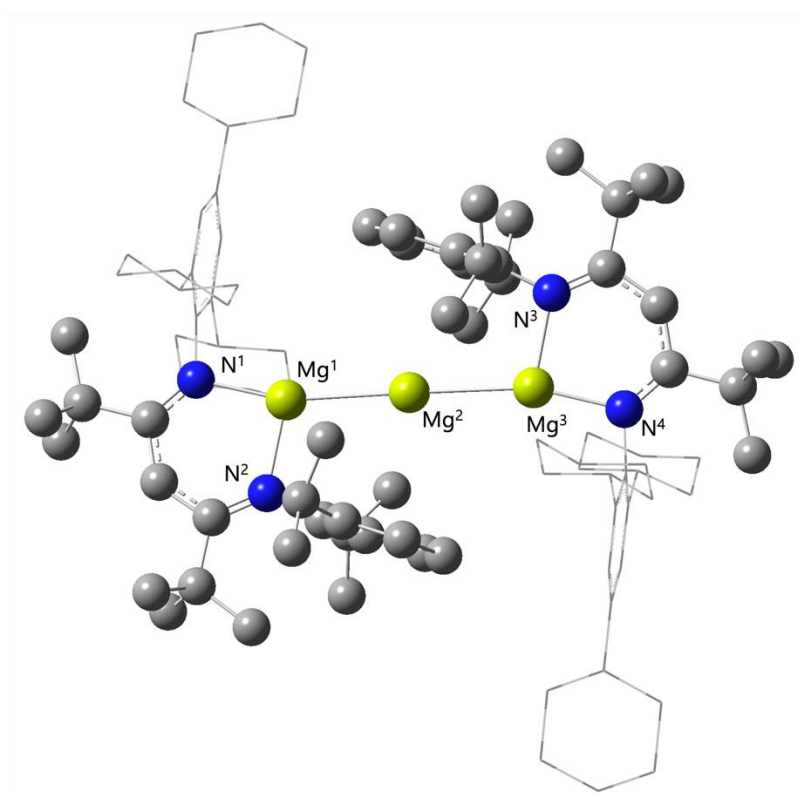

**Figure S116:** Labelled image of compound **7** used for NBO analysis. Hydrogen atoms omitted and tricyclohexylphenyl groups shown in wireframe for clarity.

**Table S6:** Select Natural population Analysis (NPA) charge and Wiberg Bond Index (WBI) data from the NBO analysis on compound **7**.

| Atom | NPA Charge | Bond    | WBI   |
|------|------------|---------|-------|
| Mg1  | +0.803     | Mg1–Mg2 | 0.508 |
| Mg2  | +0.337     | Mg2–Mg3 | 0.506 |
| Mg3  | +0.800     | -       | -     |

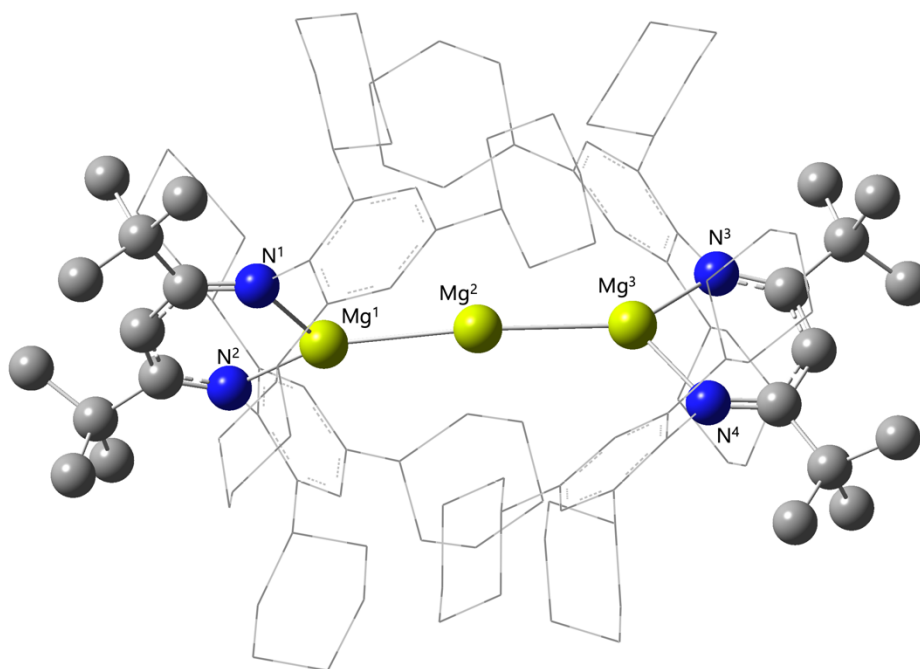

**Figure S117:** Labelled image of compound **8** used for NBO analysis. Hydrogen atoms omitted and tricyclohexylphenyl groups shown in wireframe for clarity.

**Table S7:** Select Natural population Analysis (NPA) charge and Wiberg Bond Index (WBI) data from the NBO analysis on compound **8**.

| Atom | NPA Charge | Bond    | WBI    |
|------|------------|---------|--------|
| Mg1  | +0.774     | Mg1–Mg2 | 0.498  |
| Mg2  | +0.408     | Mg2–Mg3 | 0.495  |
| Mg3  | +0.801     | Mg1–N1  | 0.0316 |
| N1   | -0.761     | Mg1–N3  | 0.0334 |
| N2   | -0.778     | Mg3–N3  | 0.0331 |
| N3   | -0.762     | Mg3–N4  | 0.0496 |
| N4   | -0.778     | -       |        |

### *Cartesian Coordinates*

|          |          |           |           |
|----------|----------|-----------|-----------|
| <b>6</b> |          |           |           |
| Mg       | 6.420201 | 11.495701 | 3.073608  |
| N        | 5.951253 | 10.022205 | 1.593510  |
| N        | 7.180531 | 12.817569 | 1.576592  |
| C        | 6.280669 | 8.896844  | -0.691374 |
| C        | 6.345288 | 10.087681 | 0.326327  |
| C        | 6.960612 | 11.236857 | -0.219439 |
| H        | 7.195053 | 11.132399 | -1.271252 |
| C        | 7.292508 | 12.511840 | 0.289973  |
| C        | 7.729921 | 13.515572 | -0.825354 |
| C        | 5.482309 | 7.665879  | -0.242846 |

|   |           |           |           |
|---|-----------|-----------|-----------|
| H | 5.630191  | 6.869854  | -0.989576 |
| H | 4.406134  | 7.865043  | -0.178573 |
| H | 5.801525  | 7.273012  | 0.727622  |
| C | 7.740832  | 8.450698  | -0.920470 |
| H | 8.212425  | 8.126747  | 0.018582  |
| H | 8.353982  | 9.262648  | -1.335165 |
| H | 7.769558  | 7.602728  | -1.623353 |
| C | 5.688899  | 9.331319  | -2.045401 |
| H | 5.614505  | 8.454576  | -2.707144 |
| H | 6.302392  | 10.078331 | -2.566350 |
| H | 4.677574  | 9.747087  | -1.930271 |
| C | 6.523261  | 13.693230 | -1.769180 |
| H | 6.198520  | 12.745122 | -2.217663 |
| H | 6.781277  | 14.389309 | -2.583144 |
| H | 5.666828  | 14.115349 | -1.221876 |
| C | 8.927048  | 12.950787 | -1.610547 |
| H | 9.782223  | 12.763828 | -0.944557 |
| H | 9.247775  | 13.678510 | -2.372494 |
| H | 8.693887  | 12.010963 | -2.128769 |
| C | 8.122060  | 14.923024 | -0.361184 |
| H | 7.334423  | 15.404361 | 0.229487  |
| H | 8.292896  | 15.542472 | -1.255697 |
| H | 9.041514  | 14.940119 | 0.234525  |
| C | 4.963240  | 9.173614  | 2.132811  |
| C | 3.615132  | 9.310741  | 1.706102  |
| C | 2.627163  | 8.542555  | 2.317818  |
| H | 1.595354  | 8.629090  | 1.970905  |
| C | 2.901255  | 7.669622  | 3.374743  |
| C | 4.220678  | 7.585191  | 3.810646  |
| H | 4.459401  | 6.918406  | 4.637645  |
| C | 5.258903  | 8.315238  | 3.219010  |
| C | 3.261407  | 10.303040 | 0.622438  |
| H | 4.064349  | 10.280321 | -0.127635 |
| C | 3.235484  | 11.742117 | 1.151466  |
| H | 2.431711  | 11.834158 | 1.900949  |
| H | 4.179048  | 11.961977 | 1.676279  |
| C | 3.026316  | 12.731829 | 0.013390  |
| H | 3.898494  | 12.678242 | -0.660475 |
| H | 2.998833  | 13.759811 | 0.403173  |
| C | 1.753677  | 12.428491 | -0.770765 |
| H | 0.878499  | 12.588767 | -0.114710 |
| H | 1.643150  | 13.130289 | -1.613846 |
| C | 1.744155  | 10.986670 | -1.271848 |
| H | 2.546382  | 10.858844 | -2.020938 |
| H | 0.797742  | 10.764026 | -1.791357 |
| C | 1.963881  | 9.999857  | -0.128063 |
| H | 1.107402  | 10.066741 | 0.565756  |
| H | 1.980786  | 8.964239  | -0.506436 |
| C | 6.675584  | 8.148845  | 3.721984  |
| H | 7.142586  | 9.155579  | 3.704191  |
| C | 6.767288  | 7.667053  | 5.169265  |
| H | 6.148231  | 8.311875  | 5.819516  |
| H | 6.343024  | 6.652343  | 5.260523  |
| C | 8.211685  | 7.638787  | 5.647665  |
| H | 8.607504  | 8.669609  | 5.642600  |
| H | 8.265959  | 7.288794  | 6.690490  |
| C | 9.073572  | 6.756594  | 4.750734  |
| H | 8.726745  | 5.710386  | 4.835468  |
| H | 10.120417 | 6.763791  | 5.094180  |
| C | 8.981301  | 7.202206  | 3.295682  |

|   |           |           |          |
|---|-----------|-----------|----------|
| H | 9.427132  | 8.207226  | 3.198793 |
| H | 9.572102  | 6.535158  | 2.646359 |
| C | 7.534733  | 7.261680  | 2.815648 |
| H | 7.100042  | 6.245913  | 2.783528 |
| H | 7.497629  | 7.654876  | 1.792327 |
| C | 1.787539  | 6.837932  | 3.966164 |
| H | 0.872164  | 7.459752  | 3.938380 |
| C | 2.005831  | 6.423342  | 5.422721 |
| H | 2.908673  | 5.791612  | 5.492623 |
| H | 2.201807  | 7.313390  | 6.042179 |
| C | 0.815424  | 5.636510  | 5.965011 |
| H | 0.999537  | 5.340417  | 7.010695 |
| H | -0.074788 | 6.291055  | 5.980948 |
| C | 0.523596  | 4.408554  | 5.105814 |
| H | -0.360264 | 3.872192  | 5.488327 |
| H | 1.372205  | 3.704445  | 5.183026 |
| C | 0.323752  | 4.790530  | 3.641099 |
| H | -0.596494 | 5.395738  | 3.547151 |
| H | 0.165877  | 3.889542  | 3.025747 |
| C | 1.504203  | 5.596080  | 3.105020 |
| H | 2.414146  | 4.969215  | 3.089244 |
| H | 1.324307  | 5.903410  | 2.062351 |
| C | 7.733351  | 13.928929 | 2.237425 |
| C | 9.126116  | 13.963580 | 2.518209 |
| C | 9.645477  | 15.020253 | 3.276566 |
| H | 10.720043 | 15.058141 | 3.463684 |
| C | 8.832824  | 16.022539 | 3.823509 |
| C | 7.458186  | 15.931745 | 3.587981 |
| H | 6.795582  | 16.685460 | 4.018839 |
| C | 6.892769  | 14.923447 | 2.797416 |
| C | 10.036009 | 12.834119 | 2.086800 |
| H | 9.539666  | 12.287388 | 1.270954 |
| C | 10.218449 | 11.830399 | 3.237292 |
| H | 10.694243 | 12.349415 | 4.090816 |
| H | 9.227432  | 11.482871 | 3.591807 |
| C | 11.074612 | 10.640454 | 2.823357 |
| H | 11.211510 | 9.959724  | 3.678318 |
| H | 10.534867 | 10.067675 | 2.048444 |
| C | 12.424236 | 11.091767 | 2.272053 |
| H | 13.013737 | 10.223210 | 1.935705 |
| H | 13.004781 | 11.566783 | 3.084234 |
| C | 12.250242 | 12.092425 | 1.131523 |
| H | 11.760316 | 11.588290 | 0.278868 |
| H | 13.232210 | 12.435538 | 0.766959 |
| C | 11.402662 | 13.286471 | 1.562689 |
| H | 11.271276 | 13.993393 | 0.727058 |
| H | 11.944114 | 13.835757 | 2.352380 |
| C | 9.423503  | 17.127017 | 4.668057 |
| H | 10.506365 | 17.154813 | 4.451187 |
| C | 9.270594  | 16.845710 | 6.171808 |
| H | 9.715175  | 15.869268 | 6.431215 |
| H | 8.195468  | 16.764644 | 6.412207 |
| C | 9.909373  | 17.943673 | 7.015041 |
| H | 9.754155  | 17.733187 | 8.083506 |
| H | 11.002238 | 17.925977 | 6.854239 |
| C | 9.368303  | 19.324021 | 6.657087 |
| H | 8.297169  | 19.373145 | 6.925783 |
| H | 9.874169  | 20.101428 | 7.252818 |
| C | 9.524119  | 19.606412 | 5.165344 |
| H | 10.599547 | 19.658815 | 4.915718 |

|    |           |           |           |
|----|-----------|-----------|-----------|
| H  | 9.097964  | 20.590487 | 4.910528  |
| C  | 8.867036  | 18.514779 | 4.325957  |
| H  | 8.999422  | 18.711383 | 3.249730  |
| H  | 7.779097  | 18.530025 | 4.513385  |
| C  | 5.403496  | 14.962241 | 2.529881  |
| H  | 5.166347  | 14.133623 | 1.842265  |
| C  | 4.594280  | 14.754945 | 3.817445  |
| H  | 4.872735  | 13.783153 | 4.263579  |
| H  | 4.888226  | 15.528130 | 4.548073  |
| C  | 3.092310  | 14.830724 | 3.577911  |
| H  | 2.785285  | 13.985952 | 2.938078  |
| H  | 2.553746  | 14.702743 | 4.530993  |
| C  | 2.698939  | 16.147828 | 2.914072  |
| H  | 1.614986  | 16.174343 | 2.714419  |
| H  | 2.907713  | 16.979012 | 3.612482  |
| C  | 3.481964  | 16.372592 | 1.623210  |
| H  | 3.230359  | 17.352449 | 1.185339  |
| H  | 3.176589  | 15.618495 | 0.878406  |
| C  | 4.987714  | 16.277820 | 1.848617  |
| H  | 5.306196  | 17.123983 | 2.481963  |
| H  | 5.526528  | 16.392438 | 0.894271  |
| Mg | 8.093036  | 12.651564 | 8.453973  |
| Na | 6.290577  | 11.109490 | 6.067336  |
| N  | 6.592457  | 12.169652 | 9.922700  |
| N  | 9.542174  | 12.696897 | 10.007727 |
| C  | 5.627712  | 11.981277 | 12.276623 |
| C  | 6.784003  | 12.077487 | 11.231431 |
| C  | 8.064080  | 12.178482 | 11.818659 |
| H  | 8.059000  | 12.033132 | 12.890198 |
| C  | 9.347801  | 12.448493 | 11.292170 |
| C  | 10.502162 | 12.294905 | 12.328958 |
| C  | 4.237414  | 11.652558 | 11.720562 |
| H  | 3.903631  | 12.363681 | 10.958267 |
| H  | 3.516505  | 11.693910 | 12.552138 |
| H  | 4.180922  | 10.647027 | 11.285256 |
| C  | 5.541500  | 13.375141 | 12.929751 |
| H  | 5.329087  | 14.143432 | 12.170889 |
| H  | 6.482206  | 13.647769 | 13.427777 |
| H  | 4.731477  | 13.398541 | 13.676472 |
| C  | 5.927174  | 10.921328 | 13.352186 |
| H  | 5.062552  | 10.830586 | 14.027668 |
| H  | 6.798285  | 11.165728 | 13.974349 |
| H  | 6.102804  | 9.933868  | 12.897885 |
| C  | 10.151981 | 12.956369 | 13.674015 |
| H  | 9.883791  | 14.015552 | 13.537734 |
| H  | 11.025939 | 12.914724 | 14.342321 |
| H  | 9.323556  | 12.464000 | 14.200622 |
| C  | 11.861686 | 12.864766 | 11.908045 |
| H  | 12.229455 | 12.445858 | 10.966737 |
| H  | 12.596082 | 12.620145 | 12.691435 |
| H  | 11.845195 | 13.956433 | 11.799367 |
| C  | 10.671043 | 10.775166 | 12.527455 |
| H  | 9.746191  | 10.313821 | 12.901924 |
| H  | 11.480468 | 10.569509 | 13.246382 |
| H  | 10.928218 | 10.287314 | 11.575180 |
| C  | 5.464015  | 11.782219 | 9.183120  |
| C  | 5.220486  | 10.398388 | 8.952263  |
| C  | 4.229808  | 10.023582 | 8.036715  |
| H  | 4.042689  | 8.961745  | 7.855975  |
| C  | 3.472462  | 10.967065 | 7.319126  |

|   |           |           |           |
|---|-----------|-----------|-----------|
| C | 3.729546  | 12.317360 | 7.567666  |
| H | 3.160565  | 13.075370 | 7.027791  |
| C | 4.707460  | 12.746497 | 8.475606  |
| C | 6.070507  | 9.369070  | 9.666376  |
| H | 6.279648  | 9.762517  | 10.673783 |
| C | 7.436195  | 9.187668  | 8.991708  |
| H | 7.280289  | 8.779448  | 7.979051  |
| H | 7.927788  | 10.165430 | 8.857101  |
| C | 8.339745  | 8.260223  | 9.794102  |
| H | 8.573482  | 8.744818  | 10.758392 |
| H | 9.301724  | 8.125922  | 9.274482  |
| C | 7.672988  | 6.909862  | 10.040366 |
| H | 7.559343  | 6.383600  | 9.074844  |
| H | 8.315022  | 6.270396  | 10.668004 |
| C | 6.296045  | 7.075495  | 10.679809 |
| H | 6.414495  | 7.494211  | 11.695651 |
| H | 5.809731  | 6.094210  | 10.804259 |
| C | 5.405871  | 8.004707  | 9.857766  |
| H | 4.420983  | 8.127269  | 10.337969 |
| H | 5.219887  | 7.538523  | 8.873930  |
| C | 2.398802  | 10.509853 | 6.355009  |
| H | 2.770358  | 9.593435  | 5.858853  |
| C | 1.117462  | 10.138317 | 7.121874  |
| H | 1.349589  | 9.375042  | 7.882726  |
| H | 0.775887  | 11.031136 | 7.676540  |
| C | 0.009747  | 9.650520  | 6.194328  |
| H | -0.900969 | 9.429352  | 6.774904  |
| H | 0.322035  | 8.699428  | 5.731752  |
| C | -0.286273 | 10.662970 | 5.091694  |
| H | -1.057588 | 10.271464 | 4.407714  |
| H | -0.706764 | 11.580160 | 5.543516  |
| C | 0.981855  | 11.015712 | 4.320017  |
| H | 0.764778  | 11.774877 | 3.550922  |
| H | 1.348448  | 10.126238 | 3.783679  |
| C | 2.084141  | 11.517176 | 5.245164  |
| H | 1.756908  | 12.471357 | 5.693550  |
| H | 3.003631  | 11.730402 | 4.673929  |
| C | 4.894554  | 14.229613 | 8.709938  |
| H | 5.761318  | 14.349746 | 9.381745  |
| C | 5.196282  | 14.995945 | 7.417532  |
| H | 6.090582  | 14.552144 | 6.946316  |
| H | 4.364137  | 14.855713 | 6.707925  |
| C | 5.402413  | 16.483377 | 7.669396  |
| H | 6.305569  | 16.621004 | 8.289198  |
| H | 5.600237  | 17.003824 | 6.717325  |
| C | 4.197098  | 17.100342 | 8.374187  |
| H | 3.326618  | 17.064048 | 7.693882  |
| H | 4.377317  | 18.166068 | 8.592050  |
| C | 3.859365  | 16.346119 | 9.657997  |
| H | 2.953706  | 16.766893 | 10.124750 |
| H | 4.675604  | 16.489451 | 10.387390 |
| C | 3.674478  | 14.851724 | 9.410019  |
| H | 2.781840  | 14.690791 | 8.779281  |
| H | 3.476086  | 14.329910 | 10.359308 |
| C | 10.631779 | 13.328360 | 9.380498  |
| C | 10.784862 | 14.730838 | 9.517668  |
| C | 11.696217 | 15.391502 | 8.692389  |
| H | 11.819938 | 16.471145 | 8.788386  |
| C | 12.450931 | 14.721331 | 7.725426  |
| C | 12.299632 | 13.339145 | 7.625849  |

|    |           |           |           |
|----|-----------|-----------|-----------|
| H  | 12.891934 | 12.790221 | 6.889161  |
| C  | 11.406240 | 12.626039 | 8.428530  |
| C  | 9.956999  | 15.479457 | 10.541353 |
| H  | 9.875632  | 14.832361 | 11.429703 |
| C  | 10.584455 | 16.789856 | 11.022208 |
| H  | 11.619683 | 16.610221 | 11.356013 |
| H  | 10.647940 | 17.502826 | 10.181870 |
| C  | 9.759812  | 17.423319 | 12.139287 |
| H  | 10.221206 | 18.370579 | 12.463253 |
| H  | 9.769721  | 16.755517 | 13.019840 |
| C  | 8.316012  | 17.653629 | 11.700133 |
| H  | 8.300332  | 18.407380 | 10.891574 |
| H  | 7.722270  | 18.074038 | 12.528460 |
| C  | 7.684023  | 16.362206 | 11.191414 |
| H  | 7.597351  | 15.639631 | 12.021426 |
| H  | 6.658662  | 16.548927 | 10.836864 |
| C  | 8.513314  | 15.725836 | 10.082880 |
| H  | 8.519098  | 16.364705 | 9.184195  |
| H  | 8.049227  | 14.773744 | 9.782512  |
| C  | 13.348501 | 15.471985 | 6.772702  |
| H  | 13.321978 | 16.538765 | 7.062026  |
| C  | 12.811149 | 15.377180 | 5.338188  |
| H  | 12.780064 | 14.313915 | 5.039108  |
| H  | 11.769610 | 15.726324 | 5.325191  |
| C  | 13.663712 | 16.159335 | 4.346455  |
| H  | 13.598754 | 17.237173 | 4.583181  |
| H  | 13.265263 | 16.043908 | 3.324425  |
| C  | 15.123163 | 15.714494 | 4.406457  |
| H  | 15.738973 | 16.313389 | 3.715712  |
| H  | 15.193973 | 14.667597 | 4.058572  |
| C  | 15.673561 | 15.806713 | 5.828808  |
| H  | 16.715189 | 15.447360 | 5.861073  |
| H  | 15.702715 | 16.867957 | 6.136644  |
| C  | 14.814046 | 15.023356 | 6.819040  |
| H  | 15.202123 | 15.129974 | 7.844805  |
| H  | 14.869217 | 13.946759 | 6.577892  |
| C  | 11.342022 | 11.119258 | 8.312829  |
| H  | 10.474245 | 10.778728 | 8.904706  |
| C  | 11.138211 | 10.631616 | 6.873722  |
| H  | 10.195057 | 11.054688 | 6.485827  |
| H  | 11.948491 | 11.019301 | 6.231908  |
| C  | 11.115564 | 9.111713  | 6.786044  |
| H  | 10.225455 | 8.738291  | 7.318579  |
| H  | 10.998808 | 8.798541  | 5.737129  |
| C  | 12.360704 | 8.477577  | 7.395381  |
| H  | 13.246074 | 8.760947  | 6.797231  |
| H  | 12.293256 | 7.377872  | 7.350483  |
| C  | 12.557540 | 8.946045  | 8.833632  |
| H  | 13.479130 | 8.517324  | 9.260671  |
| H  | 11.724089 | 8.572112  | 9.455519  |
| C  | 12.598165 | 10.467924 | 8.917238  |
| H  | 13.485317 | 10.843782 | 8.376658  |
| H  | 12.720858 | 10.788748 | 9.962446  |
| Na | 8.276740  | 13.367016 | 5.483942  |

7

|    |          |          |           |
|----|----------|----------|-----------|
| Mg | 5.475901 | 7.925828 | 8.094275  |
| N  | 6.351742 | 6.400026 | 9.256522  |
| N  | 5.535897 | 6.785678 | 6.384040  |
| C  | 6.406214 | 6.909801 | 10.573964 |

|   |           |           |           |
|---|-----------|-----------|-----------|
| C | 5.296780  | 6.741718  | 11.439786 |
| C | 5.277568  | 7.418509  | 12.664411 |
| H | 4.419484  | 7.289229  | 13.328078 |
| C | 6.305958  | 8.275411  | 13.040295 |
| H | 6.257576  | 8.827764  | 13.979959 |
| C | 7.372029  | 8.470941  | 12.168014 |
| H | 8.161789  | 9.172010  | 12.447607 |
| C | 7.441724  | 7.812270  | 10.934142 |
| C | 4.098118  | 5.898864  | 11.044063 |
| H | 4.337153  | 5.415064  | 10.084717 |
| C | 3.789069  | 4.797284  | 12.060327 |
| H | 4.658644  | 4.146483  | 12.233870 |
| H | 2.959093  | 4.165561  | 11.706485 |
| H | 3.490489  | 5.218414  | 13.033340 |
| C | 2.876284  | 6.794622  | 10.823271 |
| H | 2.607449  | 7.332289  | 11.746017 |
| H | 2.001954  | 6.207283  | 10.505809 |
| H | 3.081098  | 7.554318  | 10.050217 |
| C | 8.622326  | 8.085258  | 10.017483 |
| H | 8.424829  | 7.560786  | 9.068228  |
| C | 9.927868  | 7.531396  | 10.596154 |
| H | 10.180913 | 8.028840  | 11.546046 |
| H | 10.763959 | 7.695582  | 9.897969  |
| H | 9.861194  | 6.452209  | 10.794850 |
| C | 8.761021  | 9.577131  | 9.709278  |
| H | 7.865322  | 9.951233  | 9.188002  |
| H | 9.629801  | 9.766065  | 9.062646  |
| H | 8.888300  | 10.173327 | 10.624981 |
| C | 7.352422  | 4.080778  | 9.632856  |
| C | 6.694544  | 5.211688  | 8.787130  |
| C | 6.507336  | 4.857213  | 7.427405  |
| H | 6.840341  | 3.851500  | 7.199122  |
| C | 6.000685  | 5.545166  | 6.302480  |
| C | 6.048848  | 4.709036  | 4.989043  |
| C | 7.588216  | 4.403924  | 11.111474 |
| H | 8.229675  | 5.279589  | 11.257094 |
| H | 8.089344  | 3.540838  | 11.577302 |
| H | 6.658708  | 4.585294  | 11.660632 |
| C | 6.450746  | 2.833743  | 9.582368  |
| H | 5.451125  | 3.058847  | 9.983970  |
| H | 6.888517  | 2.030709  | 10.196323 |
| H | 6.322020  | 2.445207  | 8.563273  |
| C | 8.730624  | 3.761533  | 9.021748  |
| H | 8.661560  | 3.392939  | 7.989595  |
| H | 9.236486  | 2.989224  | 9.622685  |
| H | 9.369914  | 4.657639  | 9.013455  |
| C | 5.198785  | 3.440213  | 5.187138  |
| H | 5.571293  | 2.801597  | 5.999079  |
| H | 5.196248  | 2.842682  | 4.261675  |
| H | 4.155976  | 3.705497  | 5.420560  |
| C | 7.513545  | 4.329441  | 4.702376  |
| H | 8.134503  | 5.232056  | 4.595263  |
| H | 7.576375  | 3.762222  | 3.760089  |
| H | 7.954988  | 3.712940  | 5.496720  |
| C | 5.515153  | 5.402838  | 3.730970  |
| H | 4.458674  | 5.679257  | 3.816089  |
| H | 5.609173  | 4.701336  | 2.887148  |
| H | 6.073370  | 6.309484  | 3.472455  |
| C | 5.050846  | 7.646163  | 5.370422  |
| C | 5.931964  | 8.575598  | 4.770902  |

|    |           |           |           |
|----|-----------|-----------|-----------|
| C  | 5.410666  | 9.559339  | 3.929052  |
| H  | 6.100198  | 10.275967 | 3.474584  |
| C  | 4.043523  | 9.661834  | 3.658065  |
| C  | 3.192786  | 8.736427  | 4.265971  |
| H  | 2.118438  | 8.809425  | 4.073740  |
| C  | 3.663394  | 7.739191  | 5.125118  |
| C  | 7.415898  | 8.532397  | 5.050422  |
| H  | 7.609699  | 7.652661  | 5.685668  |
| C  | 8.258298  | 8.363079  | 3.778659  |
| H  | 7.934247  | 7.462632  | 3.232988  |
| H  | 8.075644  | 9.215453  | 3.100650  |
| C  | 9.747103  | 8.286340  | 4.103284  |
| H  | 9.939157  | 7.376116  | 4.700412  |
| H  | 10.335230 | 8.180064  | 3.177021  |
| C  | 10.206895 | 9.509538  | 4.892323  |
| H  | 10.109427 | 10.407530 | 4.255181  |
| H  | 11.275947 | 9.424482  | 5.147768  |
| C  | 9.370688  | 9.698322  | 6.155636  |
| H  | 9.684742  | 10.605463 | 6.696583  |
| H  | 9.552622  | 8.849686  | 6.838857  |
| C  | 7.880749  | 9.764424  | 5.839882  |
| H  | 7.285417  | 9.854755  | 6.766902  |
| H  | 7.663701  | 10.673465 | 5.250884  |
| C  | 2.693907  | 6.815272  | 5.824909  |
| H  | 3.286916  | 6.025724  | 6.314721  |
| C  | 1.938585  | 7.559192  | 6.936026  |
| H  | 2.659249  | 8.035014  | 7.626392  |
| H  | 1.367818  | 8.389307  | 6.482798  |
| C  | 0.994586  | 6.633628  | 7.693368  |
| H  | 1.592663  | 5.870966  | 8.222215  |
| H  | 0.451514  | 7.195103  | 8.471063  |
| C  | 0.019885  | 5.935093  | 6.749550  |
| H  | -0.647631 | 6.688700  | 6.293327  |
| H  | -0.629896 | 5.242055  | 7.308864  |
| C  | 0.763667  | 5.192371  | 5.641995  |
| H  | 0.049861  | 4.720963  | 4.946640  |
| H  | 1.351553  | 4.369464  | 6.088125  |
| C  | 1.704071  | 6.123089  | 4.880176  |
| H  | 1.104963  | 6.884140  | 4.350329  |
| H  | 2.253235  | 5.567487  | 4.102845  |
| Mg | 5.062396  | 9.939464  | 9.900319  |
| C  | 3.503465  | 10.751994 | 2.763562  |
| C  | 3.745508  | 12.151514 | 3.349874  |
| C  | 4.058807  | 10.666785 | 1.334659  |
| H  | 2.408995  | 10.611280 | 2.698015  |
| C  | 3.187985  | 13.251620 | 2.451351  |
| H  | 4.832566  | 12.300574 | 3.480277  |
| H  | 3.303477  | 12.214324 | 4.355802  |
| C  | 3.496428  | 11.767599 | 0.439053  |
| H  | 5.159431  | 10.754146 | 1.372247  |
| H  | 3.842954  | 9.671155  | 0.914539  |
| C  | 3.743699  | 13.152497 | 1.033117  |
| H  | 3.406498  | 14.241332 | 2.884836  |
| H  | 2.086524  | 13.166142 | 2.416162  |
| H  | 3.933845  | 11.696749 | -0.570408 |
| H  | 2.408544  | 11.614774 | 0.316593  |
| H  | 3.303183  | 13.932040 | 0.390058  |
| H  | 4.831781  | 13.346421 | 1.056676  |
| Mg | 4.701664  | 11.944437 | 11.742578 |
| N  | 3.543156  | 13.357488 | 10.683112 |

|   |           |           |           |
|---|-----------|-----------|-----------|
| N | 4.751219  | 13.121697 | 13.431486 |
| C | 3.304496  | 12.772705 | 9.419295  |
| C | 2.191782  | 11.914085 | 9.240205  |
| C | 2.081766  | 11.177536 | 8.055086  |
| H | 1.224734  | 10.513655 | 7.920258  |
| C | 3.053705  | 11.243635 | 7.063280  |
| H | 2.975771  | 10.631451 | 6.163549  |
| C | 4.164440  | 12.058148 | 7.260334  |
| H | 4.942835  | 12.082953 | 6.494954  |
| C | 4.316497  | 12.822257 | 8.423888  |
| C | 1.152005  | 11.719858 | 10.328589 |
| H | 1.393408  | 12.420031 | 11.142983 |
| C | -0.268287 | 12.029212 | 9.849856  |
| H | -0.346516 | 13.044083 | 9.432982  |
| H | -0.983359 | 11.949812 | 10.683748 |
| H | -0.593780 | 11.323718 | 9.069029  |
| C | 1.240181  | 10.299908 | 10.893991 |
| H | 1.050672  | 9.548469  | 10.111633 |
| H | 0.505744  | 10.144551 | 11.698030 |
| H | 2.245857  | 10.100869 | 11.301043 |
| C | 5.561692  | 13.677124 | 8.588077  |
| H | 5.537388  | 14.094200 | 9.607962  |
| C | 5.577588  | 14.849339 | 7.602186  |
| H | 5.608691  | 14.489952 | 6.561095  |
| H | 6.463928  | 15.482589 | 7.765519  |
| H | 4.685747  | 15.483415 | 7.706991  |
| C | 6.837767  | 12.844875 | 8.452165  |
| H | 6.876402  | 12.062684 | 9.227575  |
| H | 7.731612  | 13.474936 | 8.565578  |
| H | 6.899004  | 12.349582 | 7.471618  |
| C | 2.268876  | 15.553746 | 10.413193 |
| C | 3.125595  | 14.507068 | 11.186133 |
| C | 3.439449  | 14.906388 | 12.509471 |
| H | 3.029515  | 15.874895 | 12.771096 |
| C | 4.179803  | 14.313495 | 13.556034 |
| C | 4.249560  | 15.193725 | 14.839952 |
| C | 1.908673  | 15.186318 | 8.970446  |
| H | 2.790424  | 15.024705 | 8.341166  |
| H | 1.335296  | 16.019999 | 8.535527  |
| H | 1.289979  | 14.285798 | 8.902312  |
| C | 0.943691  | 15.760547 | 11.169630 |
| H | 0.388030  | 14.813894 | 11.249483 |
| H | 0.310171  | 16.479187 | 10.625744 |
| H | 1.093325  | 16.146294 | 12.186887 |
| C | 3.055750  | 16.876778 | 10.351730 |
| H | 3.256686  | 17.297725 | 11.345809 |
| H | 2.485742  | 17.624575 | 9.777834  |
| H | 4.023684  | 16.729593 | 9.848910  |
| C | 2.815128  | 15.420346 | 15.353250 |
| H | 2.180220  | 15.936816 | 14.621132 |
| H | 2.836893  | 16.028086 | 16.271780 |
| H | 2.333945  | 14.460162 | 15.595788 |
| C | 4.904065  | 16.539580 | 14.475933 |
| H | 5.916621  | 16.381394 | 14.073852 |
| H | 4.991942  | 17.168537 | 15.376042 |
| H | 4.331404  | 17.102155 | 13.726663 |
| C | 5.051757  | 14.616051 | 16.010898 |
| H | 4.644010  | 13.668453 | 16.379254 |
| H | 5.015617  | 15.339858 | 16.840242 |
| H | 6.105618  | 14.447511 | 15.762961 |

|   |           |           |           |
|---|-----------|-----------|-----------|
| C | 5.551370  | 12.399418 | 14.348929 |
| C | 6.959518  | 12.508156 | 14.279386 |
| C | 7.745218  | 11.645893 | 15.044968 |
| H | 8.832882  | 11.735601 | 14.982943 |
| C | 7.188685  | 10.677612 | 15.885709 |
| C | 5.796728  | 10.585604 | 15.933106 |
| H | 5.343372  | 9.827561  | 16.578334 |
| C | 4.965769  | 11.416069 | 15.174911 |
| C | 7.611388  | 13.526238 | 13.373371 |
| H | 6.812944  | 14.175236 | 12.978498 |
| C | 8.610889  | 14.433524 | 14.101991 |
| H | 8.116527  | 14.928319 | 14.953499 |
| H | 9.421832  | 13.819295 | 14.531076 |
| C | 9.213479  | 15.468572 | 13.156402 |
| H | 8.413698  | 16.145643 | 12.804530 |
| H | 9.939061  | 16.100001 | 13.694976 |
| C | 9.874620  | 14.802497 | 11.952513 |
| H | 10.739650 | 14.208393 | 12.299698 |
| H | 10.276773 | 15.563020 | 11.263133 |
| C | 8.897582  | 13.884535 | 11.222340 |
| H | 9.397640  | 13.376093 | 10.382531 |
| H | 8.089437  | 14.494846 | 10.781112 |
| C | 8.279638  | 12.857378 | 12.163907 |
| H | 7.538812  | 12.233006 | 11.630589 |
| H | 9.057951  | 12.159792 | 12.522271 |
| C | 3.466876  | 11.233483 | 15.215429 |
| H | 3.017518  | 12.073304 | 14.660442 |
| C | 3.047342  | 9.944905  | 14.493010 |
| H | 3.448981  | 9.947040  | 13.463237 |
| H | 3.521058  | 9.084098  | 14.997876 |
| C | 1.533316  | 9.771589  | 14.485291 |
| H | 1.085344  | 10.585472 | 13.888939 |
| H | 1.259272  | 8.830919  | 13.980300 |
| C | 0.956476  | 9.815845  | 15.897603 |
| H | 1.325649  | 8.944698  | 16.469125 |
| H | -0.141851 | 9.725567  | 15.868337 |
| C | 1.367816  | 11.097402 | 16.618639 |
| H | 0.972655  | 11.106023 | 17.647673 |
| H | 0.914500  | 11.964087 | 16.103699 |
| C | 2.884735  | 11.263932 | 16.634484 |
| H | 3.330081  | 10.451347 | 17.234786 |
| H | 3.165950  | 12.204945 | 17.134031 |
| C | 8.062948  | 9.766556  | 16.713486 |
| C | 8.967795  | 8.874239  | 15.850352 |
| C | 8.898583  | 10.550971 | 17.735364 |
| H | 7.393258  | 9.096522  | 17.283173 |
| C | 9.841511  | 7.958773  | 16.704039 |
| H | 9.613476  | 9.515569  | 15.223762 |
| H | 8.352480  | 8.284162  | 15.153676 |
| C | 9.773089  | 9.633595  | 18.585388 |
| H | 9.541012  | 11.268377 | 17.194194 |
| H | 8.230280  | 11.154713 | 18.370367 |
| C | 10.665737 | 8.752018  | 17.714923 |
| H | 10.498692 | 7.352790  | 16.059055 |
| H | 9.194802  | 7.244187  | 17.245231 |
| H | 10.382569 | 10.229939 | 19.284191 |
| H | 9.126134  | 8.990763  | 19.209823 |
| H | 11.265953 | 8.072344  | 18.341824 |
| H | 11.385356 | 9.391655  | 17.171665 |

## 8

|    |           |           |           |
|----|-----------|-----------|-----------|
| Mg | 7.584440  | 4.845971  | 19.423719 |
| N  | 7.331729  | 5.068260  | 17.339397 |
| N  | 9.649176  | 4.699151  | 19.090875 |
| C  | 5.935386  | 4.929817  | 17.239920 |
| C  | 5.093944  | 6.007831  | 17.591765 |
| C  | 3.735362  | 5.758450  | 17.795112 |
| H  | 3.081991  | 6.592205  | 18.063626 |
| C  | 3.172451  | 4.488572  | 17.648321 |
| C  | 4.023396  | 3.441873  | 17.278074 |
| H  | 3.614686  | 2.440718  | 17.145190 |
| C  | 5.391045  | 3.636214  | 17.066322 |
| C  | 5.618557  | 7.425313  | 17.674323 |
| H  | 6.706314  | 7.387166  | 17.499926 |
| C  | 4.999057  | 8.295030  | 16.566103 |
| H  | 5.222389  | 7.857121  | 15.581059 |
| H  | 3.899666  | 8.271734  | 16.667915 |
| C  | 5.473348  | 9.741978  | 16.628692 |
| H  | 6.562409  | 9.779363  | 16.444914 |
| H  | 5.003565  | 10.330120 | 15.823388 |
| C  | 5.169021  | 10.355089 | 17.991495 |
| H  | 4.073159  | 10.395057 | 18.131300 |
| H  | 5.527826  | 11.396374 | 18.041190 |
| C  | 5.789269  | 9.527814  | 19.111806 |
| H  | 6.886997  | 9.605190  | 19.053437 |
| H  | 5.508083  | 9.942059  | 20.090273 |
| C  | 5.377853  | 8.062913  | 19.047521 |
| H  | 5.911350  | 7.480707  | 19.820707 |
| H  | 4.309202  | 7.980392  | 19.293355 |
| C  | 6.299866  | 2.504729  | 16.636053 |
| H  | 7.074985  | 2.951755  | 15.993781 |
| C  | 7.066232  | 1.838635  | 17.786949 |
| H  | 6.350531  | 1.347902  | 18.469002 |
| H  | 7.593446  | 2.598817  | 18.385102 |
| C  | 8.078654  | 0.832151  | 17.249210 |
| H  | 8.835548  | 1.379543  | 16.659746 |
| H  | 8.624184  | 0.354618  | 18.078267 |
| C  | 7.407590  | -0.224332 | 16.377177 |
| H  | 8.156679  | -0.921496 | 15.967658 |
| H  | 6.730496  | -0.829571 | 17.006426 |
| C  | 6.600327  | 0.415864  | 15.250957 |
| H  | 7.291021  | 0.918765  | 14.550127 |
| H  | 6.074660  | -0.357084 | 14.666641 |
| C  | 5.603363  | 1.438604  | 15.787870 |
| H  | 4.847624  | 0.916019  | 16.397697 |
| H  | 5.055337  | 1.917284  | 14.959677 |
| C  | 7.973047  | 5.331808  | 14.892862 |
| C  | 8.258308  | 5.050950  | 16.397545 |
| C  | 9.626562  | 4.876390  | 16.705963 |
| H  | 10.277707 | 4.868062  | 15.841285 |
| C  | 10.298194 | 4.720398  | 17.936758 |
| C  | 8.705550  | 4.324038  | 13.989870 |
| H  | 9.799082  | 4.392562  | 14.060974 |
| H  | 8.435075  | 4.508091  | 12.938556 |
| H  | 8.416516  | 3.290420  | 14.235026 |
| C  | 8.500575  | 6.754969  | 14.622802 |
| H  | 7.986013  | 7.485719  | 15.265210 |
| H  | 8.319896  | 7.036878  | 13.572936 |
| H  | 9.578362  | 6.834120  | 14.822630 |
| C  | 6.497649  | 5.302434  | 14.481915 |

|    |           |           |           |
|----|-----------|-----------|-----------|
| H  | 6.044003  | 4.310586  | 14.599695 |
| H  | 6.430367  | 5.574491  | 13.416885 |
| H  | 5.887134  | 6.014948  | 15.045038 |
| C  | 10.121843 | 4.927563  | 20.398453 |
| C  | 10.071632 | 3.896382  | 21.357283 |
| C  | 10.217997 | 4.224099  | 22.710413 |
| H  | 10.173483 | 3.418611  | 23.445184 |
| C  | 10.398518 | 5.537927  | 23.139632 |
| C  | 10.513526 | 6.534239  | 22.160343 |
| H  | 10.691722 | 7.562591  | 22.484084 |
| C  | 10.393265 | 6.261692  | 20.800002 |
| C  | 9.874812  | 2.455991  | 20.933718 |
| H  | 9.754346  | 2.452630  | 19.836730 |
| C  | 11.091640 | 1.579058  | 21.265059 |
| H  | 11.997018 | 1.995385  | 20.796485 |
| H  | 11.269558 | 1.606354  | 22.354938 |
| C  | 10.878412 | 0.134186  | 20.822897 |
| H  | 11.762878 | -0.474628 | 21.072469 |
| H  | 10.781732 | 0.103921  | 19.722132 |
| C  | 9.623925  | -0.462751 | 21.455937 |
| H  | 9.765897  | -0.517230 | 22.550865 |
| H  | 9.470224  | -1.498183 | 21.110073 |
| C  | 8.395405  | 0.389742  | 21.153126 |
| H  | 8.165389  | 0.332104  | 20.076665 |
| H  | 7.511934  | -0.013090 | 21.675077 |
| C  | 8.610050  | 1.845517  | 21.545729 |
| H  | 8.687737  | 1.914555  | 22.643009 |
| H  | 7.738980  | 2.459809  | 21.259055 |
| C  | 10.542146 | 7.338859  | 19.746461 |
| H  | 11.040156 | 6.869496  | 18.882633 |
| C  | 9.205081  | 7.866264  | 19.206823 |
| H  | 8.647244  | 8.354114  | 20.023979 |
| H  | 8.585730  | 7.028672  | 18.851725 |
| C  | 9.429277  | 8.832645  | 18.048741 |
| H  | 9.890025  | 8.274977  | 17.214788 |
| H  | 8.465780  | 9.206544  | 17.669955 |
| C  | 10.331501 | 9.993583  | 18.452746 |
| H  | 10.509637 | 10.661896 | 17.594406 |
| H  | 9.816681  | 10.600235 | 19.219085 |
| C  | 11.655559 | 9.486036  | 19.018310 |
| H  | 12.282195 | 10.329290 | 19.351897 |
| H  | 12.220317 | 8.978122  | 18.215453 |
| C  | 11.435010 | 8.508124  | 20.168980 |
| H  | 12.398296 | 8.125800  | 20.544575 |
| H  | 10.967406 | 9.048679  | 21.009247 |
| Mg | 5.260854  | 4.858482  | 21.088074 |
| C  | 10.385672 | 5.938069  | 24.597357 |
| C  | 9.001859  | 6.501306  | 24.970488 |
| C  | 10.792858 | 4.831855  | 25.572683 |
| H  | 11.111496 | 6.764396  | 24.719162 |
| C  | 8.935864  | 6.956785  | 26.423285 |
| H  | 8.243451  | 5.721482  | 24.786386 |
| H  | 8.749548  | 7.330264  | 24.291861 |
| C  | 10.739134 | 5.307057  | 27.022238 |
| H  | 10.107543 | 3.974436  | 25.464554 |
| H  | 11.798895 | 4.460432  | 25.317990 |
| C  | 9.353481  | 5.841588  | 27.377027 |
| H  | 7.918898  | 7.306855  | 26.661713 |
| H  | 9.604085  | 7.825656  | 26.564807 |
| H  | 11.020726 | 4.485290  | 27.700820 |

|    |           |           |           |
|----|-----------|-----------|-----------|
| H  | 11.487109 | 6.106300  | 27.174605 |
| H  | 9.329421  | 6.195216  | 28.420773 |
| H  | 8.621438  | 5.016852  | 27.309188 |
| C  | 1.676559  | 4.328858  | 17.803443 |
| C  | 0.937546  | 4.994037  | 16.630030 |
| C  | 1.210114  | 2.885248  | 17.971519 |
| H  | 1.384164  | 4.874041  | 18.719628 |
| C  | -0.577287 | 4.899856  | 16.779691 |
| H  | 1.254665  | 4.498420  | 15.694529 |
| H  | 1.252178  | 6.046057  | 16.540189 |
| C  | -0.305297 | 2.785825  | 18.107332 |
| H  | 1.525707  | 2.292655  | 17.094995 |
| H  | 1.707766  | 2.446414  | 18.849971 |
| C  | -1.028745 | 3.450903  | 16.940804 |
| H  | -1.075482 | 5.367905  | 15.914854 |
| H  | -0.888016 | 5.477812  | 17.669273 |
| H  | -0.608672 | 1.730304  | 18.202277 |
| H  | -0.614305 | 3.280178  | 19.042441 |
| H  | -2.120287 | 3.399008  | 17.086838 |
| H  | -0.811672 | 2.896216  | 16.009754 |
| C  | 11.825264 | 4.450309  | 17.803813 |
| C  | 12.489785 | 5.440351  | 16.831931 |
| C  | 12.620623 | 4.510063  | 19.112228 |
| C  | 11.949788 | 3.015879  | 17.251625 |
| H  | 12.119305 | 5.352062  | 15.802194 |
| H  | 12.333347 | 6.480234  | 17.157812 |
| H  | 13.575014 | 5.256762  | 16.804155 |
| H  | 12.250820 | 3.805332  | 19.863274 |
| H  | 13.667431 | 4.246329  | 18.894591 |
| H  | 12.617862 | 5.509325  | 19.564955 |
| H  | 13.011108 | 2.739888  | 17.144424 |
| H  | 11.478027 | 2.294682  | 17.936626 |
| H  | 11.464245 | 2.914100  | 16.270884 |
| Mg | 3.278097  | 4.949161  | 23.146520 |
| N  | 2.449927  | 3.335067  | 24.215035 |
| N  | 2.346642  | 6.256679  | 24.492970 |
| C  | 2.737202  | 2.272402  | 23.337090 |
| C  | 4.041865  | 1.737496  | 23.286708 |
| C  | 4.398328  | 0.946096  | 22.193924 |
| H  | 5.420328  | 0.565166  | 22.137150 |
| C  | 3.500288  | 0.618652  | 21.174460 |
| C  | 2.195809  | 1.114453  | 21.280244 |
| H  | 1.460078  | 0.855655  | 20.519661 |
| C  | 1.798975  | 1.946404  | 22.331195 |
| C  | 5.026457  | 1.972356  | 24.412697 |
| H  | 4.496174  | 2.526994  | 25.205098 |
| C  | 5.509889  | 0.642698  | 25.015406 |
| H  | 4.646817  | 0.068156  | 25.388387 |
| H  | 5.962623  | 0.028400  | 24.217646 |
| C  | 6.539399  | 0.847776  | 26.121305 |
| H  | 6.071881  | 1.394839  | 26.960233 |
| H  | 6.858254  | -0.126489 | 26.526640 |
| C  | 7.740895  | 1.637726  | 25.610409 |
| H  | 8.252828  | 1.048067  | 24.827704 |
| H  | 8.478242  | 1.793475  | 26.415373 |
| C  | 7.298025  | 2.975446  | 25.029309 |
| H  | 6.916324  | 3.610026  | 25.844532 |
| H  | 8.152532  | 3.515307  | 24.595993 |
| C  | 6.223005  | 2.815896  | 23.964518 |
| H  | 5.868549  | 3.809758  | 23.636129 |

|   |           |           |           |
|---|-----------|-----------|-----------|
| H | 6.660979  | 2.348940  | 23.071719 |
| C | 0.401536  | 2.521441  | 22.417260 |
| H | 0.153897  | 2.599838  | 23.487086 |
| C | 0.305457  | 3.953152  | 21.872164 |
| H | 0.546380  | 3.952727  | 20.796676 |
| H | 1.060951  | 4.594001  | 22.353461 |
| C | -1.072296 | 4.552095  | 22.132901 |
| H | -1.199387 | 4.662148  | 23.224179 |
| H | -1.131572 | 5.568887  | 21.712469 |
| C | -2.188813 | 3.677442  | 21.569602 |
| H | -3.173602 | 4.095712  | 21.834806 |
| H | -2.137017 | 3.689190  | 20.466732 |
| C | -2.075323 | 2.235645  | 22.060054 |
| H | -2.272364 | 2.207013  | 23.147094 |
| H | -2.850743 | 1.609306  | 21.589542 |
| C | -0.689534 | 1.650741  | 21.792033 |
| H | -0.533342 | 1.575466  | 20.703566 |
| H | -0.619918 | 0.624697  | 22.189135 |
| C | 1.142058  | 2.130979  | 26.033476 |
| C | 1.624544  | 3.383980  | 25.245879 |
| C | 1.179758  | 4.612786  | 25.785092 |
| H | 0.479615  | 4.506471  | 26.603734 |
| C | 1.498123  | 5.948457  | 25.465066 |
| C | -0.382342 | 2.157604  | 26.237971 |
| H | -0.721525 | 3.013342  | 26.836754 |
| H | -0.700244 | 1.243068  | 26.762362 |
| H | -0.911738 | 2.191409  | 25.273663 |
| C | 1.848196  | 2.183097  | 27.402904 |
| H | 2.941217  | 2.159750  | 27.275772 |
| H | 1.558104  | 1.311820  | 28.011771 |
| H | 1.594206  | 3.094844  | 27.961285 |
| C | 1.491113  | 0.783069  | 25.396182 |
| H | 0.996396  | 0.627678  | 24.429723 |
| H | 1.159441  | -0.018337 | 26.074743 |
| H | 2.568516  | 0.660609  | 25.240691 |
| C | 3.104705  | 7.431698  | 24.318914 |
| C | 2.969720  | 8.191561  | 23.135756 |
| C | 3.934442  | 9.164035  | 22.840948 |
| H | 3.829282  | 9.739385  | 21.918858 |
| C | 5.020716  | 9.405803  | 23.683461 |
| C | 5.102856  | 8.670107  | 24.872111 |
| H | 5.939503  | 8.867012  | 25.546887 |
| C | 4.173320  | 7.692555  | 25.212922 |
| C | 1.763344  | 7.990240  | 22.242938 |
| H | 1.242047  | 7.090201  | 22.614180 |
| C | 0.768920  | 9.156885  | 22.355297 |
| H | 0.510629  | 9.335028  | 23.409911 |
| H | 1.259894  | 10.080234 | 21.998945 |
| C | -0.493938 | 8.894217  | 21.540348 |
| H | -1.187168 | 9.747408  | 21.622783 |
| H | -1.021221 | 8.023853  | 21.971251 |
| C | -0.168090 | 8.610689  | 20.076317 |
| H | 0.247509  | 9.525797  | 19.616621 |
| H | -1.086437 | 8.371175  | 19.515066 |
| C | 0.849178  | 7.481206  | 19.941120 |
| H | 0.393448  | 6.532969  | 20.274894 |
| H | 1.114568  | 7.335500  | 18.881811 |
| C | 2.101951  | 7.744847  | 20.769736 |
| H | 2.624469  | 8.629237  | 20.365884 |
| H | 2.804210  | 6.896636  | 20.693728 |

|   |           |           |           |
|---|-----------|-----------|-----------|
| C | 4.294280  | 6.895621  | 26.492266 |
| H | 3.273391  | 6.645263  | 26.818887 |
| C | 4.999312  | 5.548995  | 26.288836 |
| H | 6.040723  | 5.732533  | 25.974388 |
| H | 4.515304  | 4.993959  | 25.469944 |
| C | 4.955683  | 4.716567  | 27.565418 |
| H | 3.902214  | 4.469022  | 27.781087 |
| H | 5.472820  | 3.755390  | 27.416676 |
| C | 5.559505  | 5.468346  | 28.747870 |
| H | 5.477261  | 4.867997  | 29.668744 |
| H | 6.638753  | 5.615849  | 28.567631 |
| C | 4.895087  | 6.829549  | 28.938048 |
| H | 5.376360  | 7.381103  | 29.762243 |
| H | 3.841870  | 6.680820  | 29.237868 |
| C | 4.935785  | 7.655599  | 27.655176 |
| H | 4.427862  | 8.623623  | 27.797691 |
| H | 5.987347  | 7.889856  | 27.416509 |
| C | 6.144089  | 10.356676 | 23.342103 |
| C | 7.277054  | 9.610767  | 22.615973 |
| C | 5.724309  | 11.600041 | 22.554987 |
| H | 6.564566  | 10.712683 | 24.301427 |
| C | 8.462302  | 10.522371 | 22.319668 |
| H | 6.881264  | 9.190859  | 21.676640 |
| H | 7.592640  | 8.746882  | 23.220880 |
| C | 6.916133  | 12.510436 | 22.265988 |
| H | 5.270003  | 11.298756 | 21.595987 |
| H | 4.941914  | 12.144113 | 23.108714 |
| C | 8.033210  | 11.762360 | 21.540669 |
| H | 9.234630  | 9.967531  | 21.764388 |
| H | 8.929588  | 10.833393 | 23.271865 |
| H | 6.592312  | 13.383728 | 21.676353 |
| H | 7.308005  | 12.908335 | 23.219804 |
| H | 8.894888  | 12.428260 | 21.369518 |
| H | 7.674645  | 11.454184 | 20.542659 |
| C | 3.967281  | -0.260634 | 20.029830 |
| C | 4.509676  | -1.608305 | 20.535012 |
| C | 2.914766  | -0.499811 | 18.947669 |
| H | 4.813450  | 0.267116  | 19.547435 |
| C | 5.047762  | -2.473278 | 19.399698 |
| H | 3.691597  | -2.138309 | 21.055868 |
| H | 5.295662  | -1.442740 | 21.287654 |
| C | 3.445967  | -1.368104 | 17.811054 |
| H | 2.038020  | -0.996106 | 19.401749 |
| H | 2.557407  | 0.461769  | 18.550742 |
| C | 3.993281  | -2.697744 | 18.320202 |
| H | 5.409138  | -3.436724 | 19.794942 |
| H | 5.925716  | -1.973399 | 18.951363 |
| H | 2.655536  | -1.534941 | 17.061154 |
| H | 4.254123  | -0.825269 | 17.291140 |
| H | 4.410741  | -3.287034 | 17.487245 |
| H | 3.164658  | -3.295421 | 18.741782 |
| C | 0.662554  | 7.011943  | 26.238326 |
| C | 0.516178  | 6.657886  | 27.728295 |
| C | 1.194115  | 8.448201  | 26.178024 |
| C | -0.724836 | 6.996348  | 25.564678 |
| H | -0.078421 | 5.751293  | 27.902887 |
| H | 1.499901  | 6.514840  | 28.200938 |
| H | 0.007496  | 7.481136  | 28.252897 |
| H | 1.310613  | 8.816362  | 25.154402 |
| H | 0.474086  | 9.105879  | 26.689471 |

H 2.162165 8.560591 26.681812  
H -1.385600 7.745190 26.030382  
H -0.638372 7.235286 24.494097  
H -1.202239 6.009688 25.651269

#### 4. References

- [S1] G. M. Richardson, M. J. Evans, T. Rajeshkumar, J. A. J. McCone, S. A. Cameron, L. Maron, C. Jones, M. D. Anker, *Chem. Eur. J.*, 2024, **30**, e202400681.
- [S2] R. Savka, H. Plenio, *Eur. J. Inorg. Chem.*, 2014, **2014**, 6246–6253.
- [S3] J. Hicks, M. Juckel, A. Paparo, D. Dange, C. Jones, *Organometallics*, 2018, **37**, 24, 4810–4813.
- [S4] P. H. M. Budzelaar, A. B. van Oort, A. G. Orpen, *Eur. J. Inorg. Chem.*, 1998, **1998**, 1485–1494.
- [S5] N. P. Cowieson, D. Aragao, M. Clift, D. J. Ericsson, C. Gee, S. J. Harrop, N. Mudie, S. Panjikar, J. R. Price, A. Riboldi-Tunnicliffe, R. Williamson, and T. Caradoc-Davies. *J. Synchrotron Rad.*, 2015, **22**, 187–190.
- [S6] D. Aragão, J. Aishima, H. Cherukuvada, R. Clarcken, M. Clift, N. P. Cowieson, D. J. Ericsson, C. L. Gee, S. Macedo, N. Mudie, S. Panjikar, J. R. Price, A. Riboldi-Tunnicliffe, R. Rostan, R. Williamson, and T. T. Caradoc-Davies. *J. Synchrotron Rad.*, 2018, **25**, 885–891.
- [S7] T. M. McPhillips, S. E. McPhillips, H.-J. Chiu, A. E. Cohen, A. M. Deacon, P. J. Ellis, E. Garman, A. Gonzalez, N. K. Sauter, R. P. Phizackerley, S. M. Soltis, and P. Kuhn. *J. Synchrotron Rad.*, 2002, **9**, 401–406.
- [S8] W. Kabsch, *J. Appl. Crystallogr.*, 1993, **26**, 795–800.
- [S9] G. M. Sheldrick. SHELX-18, **2018**, University of Göttingen.
- [S10] M. J. Frisch, G. W. Trucks, H. B. Schlegel, G. E. Scuseria, M. A. Robb, J. R. Cheeseman, G. Scalmani, V. Barone, B. Mennucci, G. A. Petersson, H. Nakatsuji, M. Caricato, X. Li, H. P. Hratchian, A. F. Izmaylov, J. Bloino, G. Zheng, J. L. Sonnenberg, M. Hada, M. Ehara, K. Toyota, R. Fukuda, J. Hasegawa, M. Ishida, T. Nakajima, Y. Honda, O. Kitao, H. Nakai, T. Vreven, J. A. Montgomery, Jr., J. E. Peralta, F. Ogliaro, M. Bearpark, J. J. Heyd, E. Brothers, K. N. Kudin, V. N. Staroverov, T. Keith, R. Kobayashi, J. Normand, K. Raghavachari, A. Rendell, J. C. Burant, S. S. Iyengar, J. Tomasi, M. Cossi, N. Rega, J. M. Millam, M. Klene, J. E. Knox, J. B. Cross, V. Bakken, C. Adamo, J. Jaramillo, R. Gomperts, R. E. Stratmann, O. Yazyev, A. J. Austin, R. Cammi, C. Pomelli, J. W. Ochterski, R. L. Martin, K. Morokuma, V. G. Zakrzewski, G. A. Voth, P. Salvador, J. J. Dannenberg, S. Dapprich, A. D. Daniels, O. Farkas, J. B. Foresman, J. V. Ortiz, J. Cioslowski, D. J. Fox, *Gaussian 09, Revision D.01*, **2013**, Gaussian Inc., Wallingford CT,.

- [S11] A. D. Becke, *J. Chem. Phys.*, 1993, **98**, 1372-1377.
- [S12] J. P. Perdew in, *Electronic Structures of Solids '91*, P. Ziesche and H. Eschrig (eds), Akademie, Berlin, **1991**.
- [S13] F. Weigend and R. Ahlrichs, *Phys. Chem. Chem. Phys.*, 2005, **7**, 3297-3305.
- [S14] S. Grimme, J. Antony, S. Ehrlich and H. Kreig, *J. Chem. Phys.*, 2010, **132**, 154104.
- [S15] B. Rösch, T. X. Gentner, J. Eyselien, J. Langer, H. Elsen and S. Harder, *Nature*, 2021, **592**, 717-721.
- [S16] E. D. Glendening, J. K. Badenhop, A. E. Reed, J. E. Carpenter, J. A. Bohmann, C. M. Morales, C. R. Landis and F. Weinhold, NBO 6.0., 2013; F. Weinhold and C. R. Landis, *Chem. Educ. Res. Pr.*, 2001, **2**, 91–104.
- [S17] E. R. Johnson, S. Keinan, P. Mori-Sánchez, J. Contreras-García, A. J. Cohen and W. Yang, *J. Am. Chem. Soc.*, 2010, **132**, 6498–6506.
- [S18] T. Lu, and F. Chen. *J. Comput. Chem.*, 2012, **33**, 580-592.
